# Supplementary material for: The ecotoxicogenomic assessment of soil toxicity associated with the production chain of 2,5-furandicarboxylic acid (FDCA), a candidate bio-based green chemical building block
Source: Royal Society of Chemistry journal article supplement (doi:10.1039/c6gc00430j), 2016-01-01
Supplement: c6gc00430j2.xlsx [file c6gc00430j2.xlsx]

## Sheet: Table S1
Ecotoxicogenomic assessment of 2, 5-furandicarboxylic acid (FDCA), a candidate bio-based green chemical building block, in soil ecosystem
Guangquan Chen, Nico M. van Straalen and Dick Roelofs
Table S1: All significantly differentially expressed genes in Folsomia candida after two days exposure to soil spiked with EC50 concentration of HMF.
List of significant genes, description, fold change and adjusted p value encountered in the Limma package for microarray data analysis. Descriptions were derived from BLAST analysis.
This file contains:
Table S1_1 : All significantly up-regulated genes in Folosomia candida in response to EC50 of HMF in soil
Table S1_2 : All significantly down-regulated genes in Folosomia candida in response to EC50 of HMF in soil
GeneName		Name of the genes on the microarray slide
Log2 Fold change		Log2 Fold change (in response to phenanthrene compared to control)
adj p value		BH adjusted P-value
Molecular function		Sequence description derived from Blast2GO, e-value ≤ 1e-05

## Sheet: Table S1_1
Table S1_1 : All significantly up-regulated genes in Folosomia candida in response to EC50 of HMF in soil
GeneName	Log2 Fold change	adj p value	Molecular function
FCTS_1568	4.21441	0.0059221	histone h4
FCTS_3116	3.89974	0.00433688	dna-directed rna omega subunit family protein
FCTS_26397	3.83074	0.0384636	Unknown
FCTS_7013	3.80763	0.00294425	Unknown
FCTS_6524	3.80221	0.00276446	Unknown
FCTS_198	3.69634	0.0085619	Unknown
FCTS_2392	3.60746	0.00348091	chitin binding peritrophin-
FCTS_5870	3.4348	0.00147419	speckle-type poz isoform 1
FCTS_1740	3.41695	0.00226272	cyclin b3
FCTS_8005	3.25587	0.00341589	Unknown
FCTS_8496	3.20723	0.00767718	Unknown
FCTS_6182	3.16074	0.00219832	pumilio homolog 2
FCTS_8656	3.14249	0.00762123	nucleosome assembly protein 1-like 1
FCTS_13572	3.13284	0.00315182	Unknown
FCTS_8432	3.12866	0.0192747	histone 3
FCTS_15316	3.0373	0.00578544	Unknown
FCTS_789	3.02594	0.00268277	eh domain-binding protein 1
FCTS_5508	3.02053	0.010343	Unknown
FCTS_2178	2.99008	0.00871921	Unknown
FCTS_9370	2.98448	0.00519672	Unknown
FCTS_18917	2.94725	0.00542639	Unknown
FCTS_2654	2.93516	0.01059	Unknown
FCTS_8689	2.92868	0.0108464	Unknown
FCTS_922	2.91897	0.00530361	niemann-pick type c- isoform b
FCTS_3511	2.91729	0.00339689	Unknown
FCTS_6428	2.91655	0.0073097	btb domain containing 3
FCTS_2334	2.91568	0.011833	Unknown
FCTS_5910	2.89448	0.00755457	Unknown
FCTS_3653	2.8888	0.0100553	protein lethal essential for life-like
FCTS_12720	2.87271	0.00272692	acyl carrier protein
FCTS_14085	2.8669	0.00232269	protein split ends
FCTS_629	2.86019	0.00337383	Unknown
FCTS_8041	2.84942	0.00315182	Unknown
FCTS_9792	2.82067	0.00791654	Unknown
FCTS_417	2.79457	0.00157294	seven in absentia
FCTS_3799	2.79089	0.00187838	protein lethal essential for life-like
FCTS_16797	2.78946	0.00530827	star protein
FCTS_13136	2.78105	0.0205292	Unknown
FCTS_4435	2.77662	0.00227907	pinus taeda anonymous locus 0 5030 02 genomic sequence
FCTS_22688	2.77472	0.00868312	Unknown
FCTS_6102	2.77469	0.00200237	importin subunit alpha-2
FCTS_1264	2.77148	0.0163091	Unknown
FCTS_10968	2.77087	0.00660784	hypothetical protein BRAFLDRAFT 81927 [Branchiostoma floridae]
FCTS_1916	2.75745	0.00322787	Unknown
FCTS_11654	2.75416	0.00157861	chromobox protein 5
FCTS_19179	2.74972	0.00210452	Unknown
FCTS_1602	2.74563	0.00157294	protein piwi-like
FCTS_25749	2.73364	0.0032783	Unknown
FCTS_6373	2.72785	0.0058222	lethal essential for life l2efl
FCTS_12623	2.7243	0.0024338	Unknown
FCTS_17373	2.72394	0.013281	Unknown
FCTS_30497	2.72316	0.00325292	Unknown
FCTS_12977	2.71283	0.00299931	zinc finger protein
FCTS_5129	2.71012	0.00358729	Unknown
FCTS_12881	2.69209	0.00847171	zinc c2h2 type family protein
FCTS_14841	2.65753	0.00323816	Unknown
FCTS_6729	2.65547	0.0032136	type and c3hc4type zinc fingercontaining protein 1
FCTS_3358	2.65001	0.00209679	histone h1
FCTS_14075	2.64644	0.00138557	hypothetical protein DAPPUDRAFT 220993 [Daphnia pulex]
FCTS_14484	2.6433	0.00335667	Unknown
FCTS_24477	2.64302	0.0183396	Unknown
FCTS_8308	2.63998	0.0252748	fad linked oxidase domain protein
FCTS_6974	2.6351	0.00268277	Unknown
FCTS_23358	2.62806	0.00364894	transcription factor iiia
FCTS_20800	2.6263	0.00147419	noggin 2
FCTS_4907	2.61497	0.0116149	Unknown
FCTS_7679	2.60956	0.0100038	zinc c2h2 type family protein
FCTS_2882	2.6093	0.00217977	Unknown
FCTS_9625	2.60788	0.00435978	zinc finger protein 708
FCTS_13576	2.5988	0.00405622	Unknown
FCTS_7193	2.59266	0.00193894	Unknown
FCTS_5091	2.59167	0.00483423	zinc finger protein 235-like
FCTS_3741	2.59132	0.00395802	Unknown
FCTS_9518	2.59097	0.00226475	Unknown
FCTS_14142	2.58621	0.0103988	Unknown
FCTS_17559	2.57294	0.00805663	Unknown
FCTS_34821	2.57029	0.0125929	Unknown
FCTS_17348	2.5702	0.00232269	Unknown
FCTS_16822	2.56976	0.00700498	Unknown
FCTS_19207	2.56969	0.00143855	Unknown
FCTS_4843	2.5332	0.00213399	replication initiator 1
FCTS_14275	2.52512	0.00964573	Unknown
FCTS_14064	2.52488	0.0168255	Unknown
FCTS_15423	2.52377	0.0145901	transcription factor sp5
FCTS_11102	2.51966	0.00786249	dentin matrix protein partial
FCTS_3080	2.51869	0.0120732	Unknown
FCTS_4091	2.51375	0.00357334	homeobox protein ceh-26
FCTS_3942	2.50913	0.00180681	Unknown
FCTS_5067	2.50753	0.00376261	ebna2 binding protein p100
FCTS_2554	2.50538	0.00750722	ubiquitin conjugating enzyme 7 interacting protein
FCTS_4802	2.50065	0.00346435	Unknown
FCTS_2088	2.49888	0.0085122	13s condensin xcap-d2 partial
FCTS_19424	2.49873	0.00745467	Unknown
FCTS_8265	2.49528	0.00432648	scp-like extracellular protein
FCTS_3406	2.48288	0.0112601	acid phosphatase 1
FCTS_5235	2.47345	0.0200444	zinc finger
FCTS_22721	2.46911	0.00584649	Unknown
FCTS_15572	2.46613	0.00341589	patj homolog
FCTS_8371	2.4649	0.0191102	organic anion transporter
FCTS_12901	2.45825	0.00741601	Unknown
FCTS_18445	2.45722	0.00798705	Unknown
FCTS_18371	2.45474	0.00200168	Unknown
FCTS_6368	2.45471	0.00380565	hypothetical protein DDB G0270072 [Dictyostelium discoideum AX4]
FCTS_15676	2.44921	0.00606451	Unknown
FCTS_20122	2.41671	0.00738084	Unknown
FCTS_2029	2.4148	0.00282346	piwi-like protein 1-like
FCTS_8326	2.41211	0.00764491	Unknown
FCTS_15828	2.41018	0.0097107	histone h4 transcription factor-like
FCTS_18093	2.40857	0.0479002	Unknown
FCTS_12349	2.40823	0.00211968	mannose-6-phosphate isomerase-like protein
FCTS_3051	2.40776	0.00416771	zinc finger protein 366
FCTS_27584	2.40223	0.00179954	transcription factor iiia
FCTS_5190	2.39662	0.0106989	zinc finger protein 134-like
FCTS_145	2.39605	0.0113639	histone embryonic
FCTS_2076	2.39154	0.0161989	global transactivator
FCTS_22586	2.39147	0.00839267	Unknown
FCTS_11460	2.39026	0.00163437	regulator of nonsense transcripts 2
FCTS_9584	2.38972	0.00127993	cytochrome b5 domain containing 2
FCTS_16005	2.38564	0.00255077	Unknown
FCTS_31704	2.37333	0.0136126	Unknown
FCTS_11149	2.37103	0.00138557	Unknown
FCTS_6048	2.36923	0.00131	zinc c2h2 type family protein
FCTS_24145	2.36658	0.00280889	Unknown
FCTS_3000	2.36501	0.00401608	Unknown
FCTS_24701	2.35084	0.0125802	Unknown
FCTS_13826	2.3508	0.00861554	Unknown
FCTS_26840	2.34303	0.00815814	Unknown
FCTS_9948	2.33705	0.00354889	zinc finger protein 28
FCTS_9087	2.33478	0.00757263	Unknown
FCTS_11589	2.3344	0.0250731	zinc finger protein 568
FCTS_17975	2.33422	0.00508223	Unknown
FCTS_17468	2.32592	0.00451725	zinc finger protein 558
FCTS_9399	2.3244	0.00374358	trypsin-like proteinase
FCTS_5613	2.32412	0.00499845	Unknown
FCTS_8657	2.32306	0.00643075	jarid1a protein
FCTS_6075	2.31042	0.00250765	Unknown
FCTS_29450	2.30946	0.00715166	Unknown
FCTS_23951	2.30917	0.00352099	Unknown
FCTS_1603	2.30806	0.00506147	dna polymerase epsilon subunit 4-like
FCTS_522	2.30112	0.00542639	cg5274 cg5274-pa
FCTS_13626	2.29984	0.00450729	Unknown
FCTS_16346	2.2935	0.00305586	Unknown
FCTS_16264	2.29332	0.00284847	Unknown
FCTS_33613	2.29179	0.00314219	Unknown
FCTS_20214	2.28873	0.00346511	Unknown
FCTS_21621	2.28301	0.00190783	zinc c2h2 type family protein
FCTS_1555	2.27567	0.00219041	secretory carrier-associated membrane protein 1
FCTS_18130	2.27522	0.0138146	conserved plasmodium protein
FCTS_3661	2.27296	0.00167875	eukaryotic translation initiation factor 4h
FCTS_14103	2.27156	0.00240883	u3 small nucleolar rna-associated protein 6 homolog
FCTS_17678	2.26964	0.00317133	Unknown
FCTS_16545	2.25368	0.003189	Unknown
FCTS_3003	2.25223	0.00264674	h3k9 methyltransferase
FCTS_7	2.25058	0.00131	lkb1 interacting protein
FCTS_8797	2.24964	0.00568058	mitochondrial sodium hydrogen exchanger nha2
FCTS_35213	2.24954	0.00141155	Unknown
FCTS_15818	2.24863	0.00299162	zinc finger and scan domain-containing protein 2-like
FCTS_5913	2.24365	0.00451725	Unknown
FCTS_8660	2.24129	0.00315182	Unknown
FCTS_8036	2.23988	0.00348091	Unknown
FCTS_889	2.23567	0.00279002	tetraspanin isoform a
FCTS_23289	2.23392	0.00147419	Unknown
FCTS_5812	2.23153	0.00197001	pinus taeda anonymous locus 0 4541 01 genomic sequence
FCTS_7672	2.23147	0.00782894	h2a histone member x
FCTS_19889	2.23055	0.0223452	Unknown
FCTS_25677	2.23006	0.00404827	Unknown
FCTS_8135	2.22989	0.00587399	cyclin e
FCTS_4238	2.22749	0.00159522	heterochromatin protein 1
FCTS_35069	2.22743	0.00193894	Unknown
FCTS_14161	2.22701	0.0033268	Unknown
FCTS_8667	2.22442	0.00623776	calcium-dependent cysteine
FCTS_16741	2.22394	0.0151799	zinc finger protein 467-like
FCTS_7276	2.22279	0.00193894	Unknown
FCTS_12735	2.22249	0.00245227	Unknown
FCTS_13978	2.22198	0.00938967	Unknown
FCTS_17965	2.22005	0.005195	Unknown
FCTS_8542	2.21869	0.00467491	PREDICTED: uncharacterized protein LOC100853570 [Vitis vinifera]
FCTS_13310	2.21477	0.00248894	Unknown
FCTS_5691	2.21371	0.00170832	Unknown
FCTS_1072	2.21336	0.00269276	Unknown
FCTS_23718	2.21106	0.0124686	Unknown
FCTS_6263	2.21076	0.00367058	ligand-gated chloride channel homolog 3
FCTS_12104	2.20809	0.00727389	tumor protein p73-like
FCTS_13753	2.20659	0.00611784	Unknown
FCTS_10335	2.20314	0.00614651	glutamate-gated chloride channel
FCTS_16954	2.20131	0.00340091	Unknown
FCTS_12695	2.19936	0.00180681	Unknown
FCTS_16712	2.19914	0.0143939	Unknown
FCTS_6006	2.19563	0.00839807	Unknown
FCTS_6652	2.19461	0.00755845	juvenile hormone epoxide hydrolase 1-like
FCTS_5632	2.19215	0.00471122	bone morphogenetic protein 2 4
FCTS_111	2.19031	0.00929902	vasa
FCTS_545	2.19023	0.00558344	Unknown
FCTS_7581	2.18976	0.0046498	ankyrin repeat protein
FCTS_7467	2.18935	0.00218977	conserved hypothetical protein [Arthroderma otae CBS 113480]
FCTS_15522	2.18807	0.00201234	zinc finger
FCTS_5672	2.1863	0.00194232	Unknown
FCTS_1580	2.18475	0.00947492	Unknown
FCTS_2991	2.18413	0.00370467	protein roadkill-like
FCTS_15542	2.17531	0.00216014	Unknown
FCTS_15782	2.17525	0.0059221	Unknown
FCTS_8799	2.17349	0.00260871	4930453n24rik protein
FCTS_18616	2.17055	0.00440702	lipase family protein
FCTS_5375	2.16876	0.0203539	oocyte zinc finger protein 6-like
FCTS_66	2.16787	0.0365446	Unknown
FCTS_5598	2.16542	0.00432921	Unknown
FCTS_5879	2.16389	0.00907957	short spindle protein 4-like isoform 1
FCTS_10859	2.1637	0.00672122	zinc finger protein
FCTS_12978	2.16267	0.00309576	zinc finger protein 319-like
FCTS_10327	2.16115	0.00657021	host cell factor 1
FCTS_6715	2.16012	0.00219041	centrosomal protein of 112 kda isoform a
FCTS_3534	2.15893	0.0433554	protein kinase domain containing protein
FCTS_26450	2.15823	0.0188294	Unknown
FCTS_25861	2.15677	0.00378225	Unknown
FCTS_15335	2.15091	0.00131	acyl carrier protein
FCTS_14251	2.14955	0.00163143	cyclin-dependent kinase 2
FCTS_12822	2.14775	0.00590898	Unknown
FCTS_2232	2.14765	0.0101312	trna-dihydrouridine synthase 4-like
FCTS_18553	2.14715	0.00180681	Unknown
FCTS_14845	2.1462	0.00314219	Unknown
FCTS_3352	2.14291	0.00157294	Unknown
FCTS_14599	2.14052	0.00538498	Unknown
FCTS_7959	2.13325	0.00740435	Unknown
FCTS_101	2.13154	0.00966305	Unknown
FCTS_23456	2.13083	0.00145193	zinc finger protein 382
FCTS_4609	2.13017	0.00193894	Unknown
FCTS_3285	2.12965	0.00458394	beclin 1-associated autophagy-related key regulator
FCTS_10937	2.12813	0.00193894	polycomb protein
FCTS_6450	2.12223	0.00576497	Unknown
FCTS_6095	2.1212	0.00295548	PREDICTED: hypothetical protein [Saccoglossus kowalevskii]
FCTS_18572	2.12048	0.00247816	Unknown
FCTS_7420	2.11849	0.00632731	structural maintenance of chromosomes protein 2
FCTS_2983	2.11792	0.00218977	Unknown
FCTS_22070	2.11654	0.00270938	Unknown
FCTS_471	2.11582	0.00232269	ataxin-7-like protein 3-like
FCTS_2276	2.11386	0.0216463	brca1 associated ring
FCTS_11578	2.11287	0.00432921	probable glutamyl-trna amidotransferase subunit mitochondrial
FCTS_19695	2.10886	0.00202265	Unknown
FCTS_31013	2.10868	0.00180681	zinc finger protein
FCTS_3599	2.10843	0.0085547	ribonucleotide reductase m2 polypeptide
FCTS_2484	2.10807	0.00213139	cytochrome p450
FCTS_10478	2.10746	0.00322179	Unknown
FCTS_5447	2.10701	0.00323816	rna-binding protein mex3b-like
FCTS_29271	2.10581	0.01198	Unknown
FCTS_16619	2.10324	0.00157861	innexin inx7
FCTS_6128	2.09722	0.00409404	high mobility group protein
FCTS_3787	2.09675	0.00346435	Unknown
FCTS_4977	2.0964	0.00260754	probable 28s ribosomal protein mitochondrial-like
FCTS_10727	2.09576	0.00131	deoxycytidylate deaminase
FCTS_2227	2.09298	0.00333844	Unknown
FCTS_18013	2.08952	0.0019047	Unknown
FCTS_7241	2.08901	0.00262402	fizzy-related protein homolog
FCTS_14139	2.08629	0.00342188	rcc1 and btb domain-containing protein 1
FCTS_12030	2.08201	0.00251443	Unknown
FCTS_15642	2.08108	0.00365483	Unknown
FCTS_18043	2.08027	0.00568058	cg7508-pa
FCTS_2691	2.07779	0.00127993	Unknown
FCTS_21036	2.07777	0.00305586	ydr415c-like protein
FCTS_33105	2.07736	0.00281049	Unknown
FCTS_22969	2.07596	0.00192365	protein-cysteine n-palmitoyltransferase rasp-like
FCTS_13049	2.0745	0.0062682	Unknown
FCTS_289	2.07327	0.00131	pdz domain protein
FCTS_14797	2.07318	0.00978228	cubitus interruptus
FCTS_17113	2.07299	0.0109765	Unknown
FCTS_13698	2.07061	0.00533521	glycoside hydrolase family 5 protein
FCTS_8350	2.07042	0.00200168	serine threonine-protein kinase rio2-like
FCTS_4087	2.06994	0.00612179	isoform a
FCTS_5981	2.06567	0.0180623	Unknown
FCTS_6433	2.06535	0.00218977	Unknown
FCTS_5793	2.06524	0.0061365	Unknown
FCTS_6167	2.06521	0.00467659	Unknown
FCTS_1213	2.06468	0.0084964	cellular retinaldehyde binding protein
FCTS_3095	2.06416	0.00746798	williams-beuren syndrome chromosomal region 27
FCTS_9593	2.06287	0.00239475	Unknown
FCTS_22648	2.06243	0.0047882	casein kinase i isoform delta-like protein
FCTS_16858	2.05937	0.00452013	Unknown
FCTS_875	2.05767	0.00294531	peptidyl-prolyl cis-trans isomerase e
FCTS_8419	2.05154	0.00820032	amino acid permease -like
FCTS_5679	2.0496	0.0105967	Unknown
FCTS_32600	2.04945	0.00427063	Unknown
FCTS_12594	2.04922	0.00575669	Unknown
FCTS_32824	2.04685	0.00727389	piwi-like protein 2-like
FCTS_6205	2.04671	0.00347063	Unknown
FCTS_4762	2.04283	0.00191573	transmembrane protein 17-like
FCTS_20669	2.04253	0.00248972	Unknown
FCTS_3915	2.04197	0.00762961	ring finger protein 17-like
FCTS_12900	2.0417	0.00746526	hypothetical protein DDB G0268252 [Dictyostelium discoideum AX4]
FCTS_7141	2.03993	0.00131	Unknown
FCTS_5364	2.03902	0.0177249	Unknown
FCTS_24252	2.03902	0.00242596	Unknown
FCTS_28609	2.03685	0.00166682	n-acetyllactosaminide beta- -n-acetylglucosaminyltransferase-like
FCTS_49	2.03626	0.00299931	Unknown
FCTS_13859	2.03574	0.00363647	Unknown
FCTS_15418	2.03258	0.00239475	Unknown
FCTS_9225	2.03223	0.0030638	wd-40 repeat-containing protein
FCTS_25694	2.03077	0.00232269	Unknown
FCTS_6041	2.03053	0.00920685	Unknown
FCTS_7565	2.02956	0.00388816	Unknown
FCTS_17942	2.02899	0.00820028	Unknown
FCTS_4172	2.02616	0.00720569	Unknown
FCTS_19989	2.02243	0.00476152	Unknown
FCTS_2876	2.02219	0.0024005	Unknown
FCTS_26109	2.02214	0.00147357	Unknown
FCTS_2419	2.02109	0.00580724	large homolog 7
FCTS_9277	2.02039	0.00476152	cg12367 cg12367-pa
FCTS_17741	2.01998	0.002718	Unknown
FCTS_3547	2.01797	0.00299162	Unknown
FCTS_3886	2.0176	0.0160848	dynamin related protein family member (drp-1)
FCTS_10690	2.01421	0.00335667	Unknown
FCTS_13413	2.01276	0.0145441	sec14-like protein
FCTS_3409	2.01251	0.00512407	wd-40 repeat-containing protein
FCTS_751	2.01025	0.00775547	lupus la
FCTS_13628	2.00968	0.0119776	Unknown
FCTS_15754	2.00839	0.00347037	Unknown
FCTS_24254	2.00627	0.00415476	Unknown
FCTS_7333	2.0042	0.00193894	Unknown
FCTS_10119	2.00294	0.00763351	beta-mannanase [Sorangium cellulosum]
FCTS_1989	2.00185	0.00138557	Unknown
FCTS_12448	2.00174	0.0032136	Unknown
FCTS_13817	2.00089	0.0100439	Unknown
FCTS_15251	2.00036	0.00836379	Unknown
FCTS_25060	1.99887	0.00157727	Unknown
FCTS_7347	1.99597	0.0240266	Unknown
FCTS_7039	1.99526	0.00186178	sodium potassium-transporting atpase subunit beta-2-like
FCTS_32728	1.9934	0.00232269	Unknown
FCTS_7787	1.99318	0.00232269	Unknown
FCTS_16736	1.99257	0.00323346	Unknown
FCTS_7895	1.99067	0.00225835	g2 m phase-specific e3 ubiquitin-protein ligase
FCTS_12474	1.98944	0.00442075	Unknown
FCTS_15068	1.98806	0.00602339	Unknown
FCTS_12850	1.98731	0.00210452	interferon regulatory factor 2-binding protein 2-like
FCTS_15641	1.98622	0.00159522	Unknown
FCTS_19358	1.98414	0.00231895	Unknown
FCTS_8020	1.98302	0.00142018	c1orf149 homolog
FCTS_6203	1.98277	0.00478824	tho complex subunit 3-like
FCTS_4132	1.98254	0.00681571	Unknown
FCTS_28064	1.98169	0.00295548	Unknown
FCTS_22664	1.97945	0.00338431	Unknown
FCTS_3600	1.97579	0.00871921	ferredoxin-fold anticodon-binding domain-containing protein 1
FCTS_1211	1.97479	0.0289471	ataxin 7-like 1
FCTS_5268	1.97469	0.0024118	btb poz domain-containing protein 1 2
FCTS_1269	1.97326	0.00610194	Unknown
FCTS_23641	1.97073	0.00193894	Unknown
FCTS_8665	1.96836	0.00173039	aspartyl-trna mitochondrial
FCTS_12602	1.96796	0.00274813	Unknown
FCTS_12311	1.96677	0.00615676	cdc-like kinase isoform cra c
FCTS_1388	1.96525	0.00201234	Unknown
FCTS_14283	1.96136	0.00131	Unknown
FCTS_4808	1.95929	0.00993963	c9orf7 homolog
FCTS_14081	1.95802	0.00250765	Unknown
FCTS_27145	1.95778	0.0024338	Unknown
FCTS_1102	1.95598	0.00522057	dorsal switch protein isoform a
FCTS_15664	1.95553	0.00248894	hypothetical protein, conserved in Plasmodium species [Plasmodium knowlesi strain H]
FCTS_32280	1.95442	0.00131	hypothetical protein BRAFLDRAFT 61248 [Branchiostoma floridae]
FCTS_9630	1.9539	0.00232269	tata-box binding protein
FCTS_11271	1.95366	0.00342736	origin recognition complex subunit 4
FCTS_1920	1.95304	0.00127371	n-myristoyltransferase 2
FCTS_3682	1.95278	0.00500131	defense protein
FCTS_20854	1.95093	0.00280185	Unknown
FCTS_2804	1.94907	0.00968354	ras gtpase-activating protein ngap isoform 1
FCTS_2978	1.94783	0.00164336	hla-b associated transcript 1
FCTS_220	1.94479	0.0271582	dna topoisomerase 2-binding protein 1
FCTS_20	1.94472	0.00291194	nuclear protein hcc-1
FCTS_4579	1.94325	0.00333999	Unknown
FCTS_11256	1.94276	0.00518416	Unknown
FCTS_23555	1.94166	0.0061365	Unknown
FCTS_13507	1.94124	0.00131	zinc finger protein 271-like
FCTS_4733	1.94088	0.00131	Unknown
FCTS_754	1.93795	0.0112109	tyrosyl-dna phosphodiesterase 2-like
FCTS_7546	1.93743	0.00488848	thymidylate synthase
FCTS_15256	1.93696	0.00299931	Unknown
FCTS_15254	1.93689	0.00127993	Unknown
FCTS_12287	1.93686	0.00329502	Unknown
FCTS_8664	1.93552	0.00209679	aspartyl-trna mitochondrial
FCTS_5280	1.93499	0.00652814	gtpase rho
FCTS_16696	1.93174	0.00583286	zinc finger
FCTS_8886	1.93079	0.00741039	GF24516 [Drosophila ananassae]
FCTS_5814	1.93039	0.00131	Unknown
FCTS_18742	1.92851	0.00207275	fizzy-related protein
FCTS_9475	1.92837	0.00243062	Unknown
FCTS_8313	1.92815	0.0206682	ubiquitin conjugating enzyme 7 interacting protein
FCTS_88	1.92558	0.00721333	dna replication licensing factor mcm4
FCTS_1532	1.92537	0.00402649	sex-determining protein fem-1
FCTS_24775	1.92407	0.00131	pupal cuticle protein
FCTS_8037	1.92199	0.00193894	retinoblastoma-binding protein 8
FCTS_3874	1.92119	0.00476627	protein piwi-like
FCTS_9866	1.92087	0.0032136	threonine aspartase 1-like
FCTS_16537	1.92074	0.00147419	Unknown
FCTS_9310	1.92061	0.00420809	actin-binding protein anillin-like
FCTS_7918	1.92031	0.00166516	Unknown
FCTS_24747	1.92021	0.00294425	Unknown
FCTS_5376	1.91937	0.00657021	zinc finger protein 184
FCTS_12028	1.91799	0.00235509	set domain containing protein with a cysteine cluster at the c-terminus
FCTS_9499	1.91775	0.0032136	Unknown
FCTS_21063	1.91768	0.00476582	Unknown
FCTS_5544	1.9158	0.00657021	Unknown
FCTS_1325	1.91564	0.00470395	Unknown
FCTS_30349	1.91421	0.00468015	Unknown
FCTS_1525	1.91411	0.00815814	serine threonine-protein phosphatase 2a activator isoform b
FCTS_25203	1.91396	0.00280889	Unknown
FCTS_7639	1.91333	0.00249656	baculoviral iap repeat-containing protein 5-like
FCTS_18894	1.91152	0.00202026	Unknown
FCTS_8784	1.91144	0.00159522	Unknown
FCTS_3879	1.91079	0.00367221	wd40 repeat-containing protein smu1-like
FCTS_3846	1.90771	0.00881381	transcription initiation factor tfiid subunit 9
FCTS_2068	1.90732	0.00636528	cytoplasmic polyadenylation element-binding protein 1
FCTS_8141	1.90681	0.0030638	Unknown
FCTS_17075	1.90209	0.00201234	y309 rhopt ame: full=upf0314 protein rpal 0309
FCTS_6528	1.89997	0.0041458	Unknown
FCTS_11322	1.89711	0.00164336	Unknown
FCTS_6770	1.89654	0.00522696	Unknown
FCTS_1054	1.89628	0.00218977	yeats domain containing protein 4
FCTS_13513	1.89464	0.00362148	peroxisome biogenesis factor 2
FCTS_22213	1.89343	0.0032398	Unknown
FCTS_21894	1.89283	0.00703389	cell adhesion molecule
FCTS_1019	1.89244	0.00209679	udp-xylose and udp-n-acetylglucosamine transporter-like
FCTS_3767	1.89135	0.0113201	zinc finger protein
FCTS_2913	1.89134	0.00281701	nurim homolog
FCTS_1265	1.88641	0.00217329	Unknown
FCTS_7492	1.88634	0.00243986	Unknown
FCTS_4429	1.88415	0.00552508	tudor domain-containing protein 6-like
FCTS_6085	1.88294	0.00438462	fanconi complementation group i
FCTS_4833	1.88257	0.00312365	nucleoporin nup37
FCTS_5992	1.88095	0.0027546	dna repair and recombination protein rad54b-like
FCTS_19390	1.87892	0.0126131	Unknown
FCTS_7246	1.87824	0.0176753	Unknown
FCTS_31997	1.87655	0.00209679	Unknown
FCTS_1453	1.87575	0.00714526	na+ k+ atpase alpha subunit
FCTS_6992	1.87436	0.0058222	aurora kinase a-like
FCTS_6092	1.87287	0.00589462	Unknown
FCTS_10	1.87203	0.00264674	Unknown
FCTS_12760	1.87121	0.0138791	Unknown
FCTS_2214	1.86988	0.0119933	Unknown
FCTS_15383	1.86917	0.00365663	zinc finger protein
FCTS_5090	1.86823	0.00735753	zinc finger protein
FCTS_650	1.86796	0.00635912	negative elongation factor e-like
FCTS_10218	1.86694	0.00155663	Unknown
FCTS_2001	1.86404	0.00282241	Unknown
FCTS_20801	1.86189	0.00209679	Unknown
FCTS_21235	1.86164	0.00218977	low quality protein: zinc finger protein 160
FCTS_6842	1.86145	0.0138908	homeobox protein msx-1
FCTS_16517	1.86027	0.00141155	Unknown
FCTS_4138	1.86005	0.00732403	carboxypeptidase d-like
FCTS_1075	1.85979	0.00163786	viral a-type inclusion protein repeat containing protein
FCTS_1937	1.85761	0.00588908	rcc1 and btb domain-containing protein 1
FCTS_5464	1.85706	0.0162905	Unknown
FCTS_31587	1.85686	0.00124471	Unknown
FCTS_9755	1.85667	0.00542639	replication factor c subunit 3-like
FCTS_1117	1.85089	0.00298004	peroxidasin partial
FCTS_7538	1.85026	0.0116996	solute carrier family 22 (organic cation transporter) member 21-like
FCTS_10348	1.85017	0.00205959	Unknown
FCTS_9296	1.85012	0.00299931	Unknown
FCTS_14488	1.84883	0.00315313	guanine nucleotide-binding protein subunit beta-like protein 1-like
FCTS_2686	1.84576	0.00309576	tubulin gamma-1 chain
FCTS_22387	1.84574	0.00216014	Unknown
FCTS_2328	1.84567	0.00535179	probable palmitoyltransferase zdhhc16-like
FCTS_183	1.84497	0.00905221	Unknown
FCTS_10622	1.84388	0.00247356	Unknown
FCTS_12689	1.84384	0.0133129	ammonium transporter
FCTS_8119	1.84261	0.00417191	histone-lysine n-methyltransferase ehmt1-like isoform 2
FCTS_3961	1.84149	0.0105869	dna-directed rna polymerase ii 19 kda polypeptide
FCTS_14589	1.84111	0.0028672	upf0693 protein c10orf32 homolog
FCTS_12094	1.8407	0.0172391	Unknown
FCTS_32707	1.84058	0.00831915	Unknown
FCTS_10552	1.84016	0.0119026	leucine rich repeat family expressed
FCTS_12444	1.8401	0.00444454	Unknown
FCTS_3474	1.84005	0.00453454	Unknown
FCTS_6978	1.83793	0.01198	cap-specific mrna (nucleoside-2 -o-)-methyltransferase 1-like
FCTS_7215	1.83732	0.00762469	Unknown
FCTS_30516	1.83477	0.0182916	Unknown
FCTS_34697	1.83286	0.00235509	GH19962 [Drosophila grimshawi]
FCTS_11947	1.83184	0.00348466	zinc finger protein 561
FCTS_15022	1.83168	0.00657021	cell division protein kinase 20
FCTS_34582	1.82853	0.00193894	Unknown
FCTS_9610	1.82846	0.00913007	Unknown
FCTS_17001	1.82682	0.00686678	Unknown
FCTS_8769	1.82631	0.00856884	protein abrupt
FCTS_7698	1.82595	0.0032065	exosome complex exonuclease rrp45
FCTS_5620	1.82186	0.00127993	prostatic acid phosphatase-like
FCTS_6080	1.82028	0.00283621	dna mismatch repair protein msh6
FCTS_11381	1.82024	0.00191573	Unknown
FCTS_8653	1.8198	0.00785666	mitochondrial ribosomal protein s7
FCTS_15292	1.81803	0.00210814	Unknown
FCTS_13907	1.81726	0.00420809	Unknown
FCTS_17674	1.81686	0.00131	Unknown
FCTS_5579	1.81662	0.00193894	hypothetical protein BRAFLDRAFT 128634 [Branchiostoma floridae]
FCTS_3740	1.81657	0.00775547	probable cytosolic iron-sulfur protein assembly protein ciao1-like
FCTS_8710	1.81574	0.00193894	Unknown
FCTS_1716	1.81489	0.00592564	isoform b
FCTS_9904	1.81205	0.00380262	Unknown
FCTS_9348	1.81119	0.00852995	dna replication licensing factor mcm2
FCTS_8202	1.8109	0.00274785	rpap2 drome ame: full= rna polymerase ii subunit b1 ctd phosphatase rpap2 homolog ame: full=rna polymerase ii-associated protein 2
FCTS_25614	1.80987	0.00147419	mgc84630 partial
FCTS_11081	1.80981	0.00308976	ero1-like protein
FCTS_9252	1.80976	0.00523506	Unknown
FCTS_4979	1.80936	0.0255947	Unknown
FCTS_729	1.80922	0.00159522	Unknown
FCTS_2571	1.80838	0.00544796	Unknown
FCTS_9749	1.80797	0.00219724	Unknown
FCTS_5976	1.80614	0.00418333	Unknown
FCTS_8641	1.80607	0.00931871	conserved hypothetical protein [Ajellomyces capsulatus G186AR]
FCTS_10036	1.80513	0.00575669	glypican 6
FCTS_7125	1.80427	0.00165383	Unknown
FCTS_7191	1.80414	0.00250765	parafibromin
FCTS_15309	1.80328	0.0019193	Unknown
FCTS_6682	1.7989	0.015663	nucleolar complex protein 4 homolog
FCTS_30188	1.79884	0.0144501	atp-dependent rna helicase tdrd9
FCTS_8483	1.79825	0.00664152	max gene-associated protein
FCTS_11533	1.79798	0.0226036	Unknown
FCTS_2206	1.79693	0.00242596	cyclopentanone -monooxygenase
FCTS_4532	1.79647	0.00538181	zinc-finger protein 80-like
FCTS_15535	1.79646	0.00302131	Unknown
FCTS_2149	1.79637	0.0102334	Unknown
FCTS_7067	1.79591	0.00337528	1-aminocyclopropane-1-carboxylate synthase-like protein 1
FCTS_12479	1.79512	0.00251443	Unknown
FCTS_17560	1.79486	0.00158497	Unknown
FCTS_15369	1.79413	0.0123175	Unknown
FCTS_7024	1.7937	0.00586773	cre-sox-2 protein
FCTS_12372	1.79347	0.00722256	zinc finger protein
FCTS_9747	1.79319	0.00745467	tyrosine kinase
FCTS_16970	1.79216	0.00176442	novel protein
FCTS_4291	1.79154	0.0115506	Unknown
FCTS_20712	1.7914	0.00227907	zinc finger protein 45-like
FCTS_1348	1.79104	0.00194232	unnamed protein product [Fibrobacter succinogenes subsp. succinogenes S85]
FCTS_9320	1.7908	0.00180914	PREDICTED: uncharacterized protein LOC100871724 [Apis florea]
FCTS_1526	1.79049	0.00445352	pkmyt1 protein
FCTS_19601	1.79007	0.00239475	Unknown
FCTS_1634	1.78984	0.00625292	a chain solution structure of the anti-apoptotic protein bcl-xl in complex with an acyl-sulfonamide-based ligand
FCTS_14011	1.78891	0.00216014	protein regulator of cytokinesis 1
FCTS_9165	1.7871	0.00335801	Unknown
FCTS_4648	1.78709	0.00295548	zinc finger and scan domain containing 12
FCTS_4109	1.78677	0.00426743	cytoplasmic linker associated protein 2
FCTS_20296	1.78654	0.00210392	Unknown
FCTS_6841	1.78539	0.0119408	Unknown
FCTS_13096	1.78492	0.00193894	Unknown
FCTS_9387	1.78147	0.00155797	Unknown
FCTS_4028	1.78145	0.00274813	coiled-coil domain containing 88a
FCTS_11155	1.78038	0.0106849	basic-leucine zipper transcription regulator giant
FCTS_29496	1.77962	0.00383937	Unknown
FCTS_29562	1.77936	0.00162932	Unknown
FCTS_1253	1.77867	0.00243076	peroxisome biogenesis factor 10
FCTS_1522	1.77852	0.00800153	glucosyl glucuronosyl transferases
FCTS_10694	1.77782	0.00487319	Unknown
FCTS_2285	1.77723	0.00757615	Unknown
FCTS_1103	1.77698	0.00206727	seven in absentia homolog 1
FCTS_9664	1.7754	0.00578544	ken and barbie
FCTS_5749	1.77515	0.00371431	Unknown
FCTS_10909	1.77491	0.00226692	Unknown
FCTS_17008	1.77484	0.00375825	hypothetical protein DAPPUDRAFT 310676 [Daphnia pulex]
FCTS_9998	1.77466	0.00239475	Unknown
FCTS_2304	1.77441	0.0193246	proteasome subunit beta type-3-like
FCTS_28403	1.77422	0.0032253	Unknown
FCTS_5003	1.77399	0.00217728	Unknown
FCTS_8155	1.77377	0.00209114	Unknown
FCTS_520	1.77083	0.0346708	cathepsin l-like
FCTS_5847	1.77071	0.00500131	Unknown
FCTS_11291	1.7707	0.00325292	sumo-activating enzyme subunit 1
FCTS_4204	1.76777	0.025575	histone-lysine n-methyltransferase suv4-20
FCTS_4180	1.76697	0.00315945	cg9723-pa
FCTS_864	1.76676	0.00476509	Unknown
FCTS_9334	1.76464	0.00280889	af407275 1 geminin
FCTS_795	1.76189	0.00138557	zinc transporter zip1
FCTS_20429	1.76182	0.00171482	Unknown
FCTS_3452	1.76141	0.00444019	Unknown
FCTS_7674	1.76098	0.00353697	adp-ribosylation factor-like protein 6-interacting protein 1
FCTS_29048	1.75963	0.00341589	Unknown
FCTS_15287	1.75958	0.00580724	Unknown
FCTS_21128	1.7593	0.0025506	zinc finger protein
FCTS_27008	1.75731	0.00882851	Unknown
FCTS_10822	1.75593	0.00790963	rna-binding protein lin-28
FCTS_22119	1.75568	0.0103346	Unknown
FCTS_3023	1.75511	0.00644383	phosphatidylinositol n-acetylglucosaminyltransferase subunit h
FCTS_6834	1.75402	0.00297072	casein kinase ii subunit beta
FCTS_5584	1.75246	0.00517344	Unknown
FCTS_7413	1.75194	0.01198	Unknown
FCTS_2118	1.75063	0.012055	alpha- -glucosyltransferase alg10-a
FCTS_11368	1.75053	0.00180681	cg1397-pa
FCTS_3729	1.75026	0.00521717	dna primase small subunit
FCTS_1626	1.74901	0.00367481	protein arginine n-methyltransferase 5
FCTS_7705	1.74869	0.02346	catenin alpha-like
FCTS_5523	1.74811	0.00260589	replication factor c large subunit
FCTS_20261	1.74762	0.0129481	Unknown
FCTS_17402	1.74748	0.00218977	Unknown
FCTS_31572	1.7464	0.00131	Unknown
FCTS_26823	1.74637	0.00612722	oxalate formate antiporter
FCTS_26913	1.74634	0.00124471	Unknown
FCTS_2568	1.74605	0.00163786	Unknown
FCTS_3946	1.745	0.00662901	piwi
FCTS_1661	1.74442	0.00614507	ankyrin repeat and lem domain-containing protein 2
FCTS_21676	1.74423	0.00281531	Unknown
FCTS_17233	1.74378	0.00572777	phosphatidylinositol glycan anchor biosynthesis class u
FCTS_21144	1.74231	0.00283164	Unknown
FCTS_2527	1.74214	0.00360148	sentrin-specific protease 7-like
FCTS_7432	1.74194	0.00836991	Unknown
FCTS_17796	1.74064	0.00159345	Unknown
FCTS_25202	1.74061	0.00319984	Unknown
FCTS_4231	1.73894	0.0124913	Unknown
FCTS_2773	1.73886	0.00777863	chitin deacetylase 4
FCTS_6218	1.73858	0.00159522	phosphoinositide-binding protein
FCTS_14834	1.73833	0.00205986	Unknown
FCTS_33999	1.73816	0.00720569	atp-binding cassette sub-family a member
FCTS_7183	1.73808	0.00281389	Unknown
FCTS_5791	1.73748	0.0040417	Unknown
FCTS_10198	1.73677	0.00279002	Unknown
FCTS_7975	1.73372	0.0129617	protein
FCTS_18721	1.73177	0.00347063	zinc finger
FCTS_6123	1.73143	0.00269511	ubiquitin carboxyl-terminal hydrolase calypso-like
FCTS_22442	1.73051	0.00312401	histone-lysine n-
FCTS_7886	1.72961	0.00755845	Unknown
FCTS_26287	1.72863	0.00214268	Unknown
FCTS_1868	1.727	0.00387864	predicted protein [Nematostella vectensis]
FCTS_24674	1.72546	0.00512006	Unknown
FCTS_6581	1.72514	0.00836686	Unknown
FCTS_202	1.72512	0.00131	eukaryotic translation initiation factor 4e
FCTS_2701	1.72427	0.00347032	ftsj methyltransferase domain-containing protein 1-like
FCTS_2863	1.72401	0.00604862	Unknown
FCTS_5005	1.72287	0.00202026	serine threonine tyrosine-interacting protein
FCTS_3159	1.72197	0.0073097	aur protein kinase
FCTS_8991	1.72168	0.0133687	protein opi10 homolog
FCTS_1339	1.72156	0.00433688	Unknown
FCTS_12590	1.72142	0.00708143	Unknown
FCTS_2982	1.72056	0.00612722	Unknown
FCTS_10911	1.71972	0.00488169	viral a-type inclusion protein
FCTS_7794	1.71939	0.00165316	dolichyl-phosphate beta-glucosyltransferase
FCTS_1304	1.71835	0.0402593	zinc finger protein
FCTS_14628	1.71803	0.00242404	zinc finger protein 51
FCTS_4576	1.71715	0.00350087	Unknown
FCTS_23550	1.71653	0.00525347	mitochondrial intermediate peptidase
FCTS_5409	1.71523	0.00193894	rothmund-thomson syndrome dna helicase recq4
FCTS_628	1.71447	0.0475998	nuclear transcription factor gamma
FCTS_3947	1.71419	0.00222481	tho complex subunit 7 homolog
FCTS_4887	1.71405	0.00688532	Unknown
FCTS_2964	1.713	0.0032253	nucleoporin 50
FCTS_3306	1.71264	0.00782894	ensangg00000007685 protein
FCTS_7597	1.71151	0.00414257	gpn-loop gtpase 3
FCTS_11390	1.71131	0.0026374	Unknown
FCTS_5337	1.70992	0.00353697	Unknown
FCTS_5319	1.70927	0.00751857	sox14 protein
FCTS_9232	1.70843	0.00243297	Unknown
FCTS_11500	1.70769	0.0091358	members only
FCTS_18096	1.70643	0.00278411	Unknown
FCTS_19252	1.70335	0.00346398	Unknown
FCTS_7377	1.7031	0.00364398	Unknown
FCTS_8801	1.70264	0.00169366	Unknown
FCTS_35329	1.69952	0.00209679	Unknown
FCTS_187	1.69942	0.00299931	annexin isoform c
FCTS_21654	1.69938	0.00647098	Unknown
FCTS_24595	1.69932	0.00907957	Unknown
FCTS_5218	1.69903	0.0174645	dna replication licensing factor mcm6
FCTS_2509	1.69847	0.00942721	protein ariadne-1 homolog
FCTS_2174	1.69799	0.00205959	ubiquitin-conjugating enzyme e2 q2-like
FCTS_33016	1.69751	0.00124471	Unknown
FCTS_15912	1.69744	0.00780181	Unknown
FCTS_8080	1.69602	0.00643289	cell cycle checkpoint control protein rad9a-like
FCTS_13299	1.69439	0.00209114	Unknown
FCTS_28244	1.69377	0.0216463	Unknown
FCTS_7208	1.69364	0.00636768	protein hira homolog
FCTS_21795	1.69237	0.00159522	brain chitinase and chia
FCTS_3427	1.69133	0.0350112	Unknown
FCTS_179	1.69095	0.00210814	Unknown
FCTS_779	1.69091	0.0478523	venom carboxylesterase-6-like
FCTS_5074	1.69051	0.010792	synaptic vesicle membrane protein vat-1 homolog-like
FCTS_10366	1.69018	0.00816804	x-ray repair complementing defective repair in chinese hamster cells 1
FCTS_5658	1.68954	0.00153113	serine threonine-protein phosphatase 2a catalytic subunit alpha isoform
FCTS_24757	1.68949	0.00138557	isoform a
FCTS_11911	1.68867	0.00861032	ephrin type-a receptor 4-a-like
FCTS_9101	1.68784	0.00501672	Unknown
FCTS_2144	1.68751	0.00232269	sodium-coupled neutral amino acid transporter 7-like
FCTS_3756	1.68727	0.00673457	rna polymerase ii second largest subunit
FCTS_1460	1.68722	0.00157861	Unknown
FCTS_476	1.6854	0.00322787	Unknown
FCTS_13309	1.6851	0.00436672	Unknown
FCTS_7785	1.68487	0.00215838	predicted protein [Nematostella vectensis]
FCTS_300	1.68388	0.00205986	protein
FCTS_8156	1.68247	0.00708247	g-protein coupled receptor moody-like
FCTS_30558	1.68138	0.00269276	Unknown
FCTS_29609	1.68074	0.014419	Unknown
FCTS_10301	1.67898	0.0159306	Unknown
FCTS_15195	1.67893	0.00506694	gastrula zinc finger
FCTS_22287	1.67876	0.00142018	g-protein coupled receptor moody-like
FCTS_2567	1.67855	0.00680845	chromobox protein homolog 1-like
FCTS_8242	1.67753	0.00407316	protein zwilch homolog
FCTS_16474	1.67583	0.00191573	multidrug resistance-associated protein 1
FCTS_2126	1.67441	0.00153211	set and mynd domain-containing protein 4-like
FCTS_17062	1.67429	0.00334171	Unknown
FCTS_14643	1.67262	0.00230825	Unknown
FCTS_23662	1.67173	0.00124471	Unknown
FCTS_24884	1.67163	0.00127993	Unknown
FCTS_10682	1.6715	0.00127993	zinc finger protein
FCTS_3762	1.67102	0.00193894	3-hydroxyisobutyrate dehydrogenase
FCTS_23946	1.66992	0.00405622	Unknown
FCTS_2330	1.66981	0.00306955	protein with signal peptide plus thr possible mucin
FCTS_17407	1.669	0.00159522	double-strand-break repair protein rad21 homolog
FCTS_7611	1.66888	0.00505492	zinc finger protein
FCTS_3339	1.66846	0.0133786	ribonucleoside-diphosphate reductase large subunit
FCTS_7462	1.6673	0.00260754	metaxin 1
FCTS_19890	1.66728	0.00284529	Unknown
FCTS_11783	1.66622	0.00131	gpi ethanolamine phosphate transferase 2-like
FCTS_19755	1.66603	0.00432921	Unknown
FCTS_13604	1.66579	0.00483423	Unknown
FCTS_10829	1.66513	0.00179954	Unknown
FCTS_9236	1.66464	0.00367481	Unknown
FCTS_32220	1.66454	0.00697103	Unknown
FCTS_21246	1.66371	0.00220823	zinc carboxypeptidase family
FCTS_2411	1.66283	0.00209679	eukaryotic translation initiation factor theta subunit
FCTS_9170	1.66281	0.00298586	hypothetical protein KGM 05412 [Danaus plexippus]
FCTS_13872	1.66178	0.00228818	hypothetical protein BRAFLDRAFT 125500 [Branchiostoma floridae]
FCTS_6116	1.66081	0.00187838	frataxin mitochondrial-like
FCTS_6530	1.6605	0.00159192	Unknown
FCTS_5391	1.65848	0.00240883	protein fam188a homolog
FCTS_12761	1.65696	0.00309576	plasma kallikrein
FCTS_29862	1.65634	0.00383937	gamma-aminobutyric acid receptor alpha-like
FCTS_14146	1.65538	0.00432143	Unknown
FCTS_25261	1.65469	0.00298004	Unknown
FCTS_9042	1.65412	0.0050953	Unknown
FCTS_24526	1.65378	0.00167811	Unknown
FCTS_687	1.65341	0.00353543	non-structural maintenance of chromosomes element 4 homolog a-like
FCTS_6910	1.65172	0.00607591	Unknown
FCTS_4971	1.65073	0.00283359	zinc finger protein 2
FCTS_34849	1.65058	0.00197168	importin alpha-3 subunit
FCTS_8846	1.64912	0.00342188	Unknown
FCTS_13723	1.64824	0.00216014	dorsal switch protein isoform a
FCTS_21689	1.64778	0.00351447	zinc finger protein 177
FCTS_11600	1.64628	0.0016431	Unknown
FCTS_13550	1.64185	0.0298969	Unknown
FCTS_27709	1.64174	0.00284599	Unknown
FCTS_11897	1.63688	0.0121224	protein arginine n-
FCTS_8879	1.63587	0.0161544	dna polymerase epsilon subunit 2
FCTS_11413	1.63535	0.0146744	predicted protein [Thalassiosira pseudonana CCMP1335]
FCTS_11619	1.63511	0.0267852	Unknown
FCTS_21192	1.63454	0.00239475	Unknown
FCTS_19907	1.63445	0.00201726	Unknown
FCTS_9038	1.63323	0.00405498	Unknown
FCTS_20844	1.63167	0.00378579	Unknown
FCTS_7228	1.63056	0.00435902	n-acetyltransferase esco2
FCTS_6941	1.6301	0.00421123	signal peptide peptidase-like 2a
FCTS_31576	1.62924	0.00158511	gastrula zinc finger protein
FCTS_1965	1.62854	0.0082594	sec14-like protein 2
FCTS_4617	1.62804	0.00147854	elmo domain-containing protein 2
FCTS_5063	1.62803	0.00561176	oocyte zinc finger protein 6-like
FCTS_5179	1.62767	0.00700498	Unknown
FCTS_9446	1.62728	0.00699937	cdc45 cell division cycle 45-like ( cerevisiae)
FCTS_7434	1.62725	0.00875149	Unknown
FCTS_4919	1.62719	0.00995815	Unknown
FCTS_11613	1.62662	0.00270998	zinc finger protein 449
FCTS_8476	1.62588	0.00277912	zinc finger protein 235-like
FCTS_13672	1.62564	0.00162932	krueppel c2h2-type zinc finger
FCTS_2498	1.62538	0.0091883	heterochromatin protein 1
FCTS_14504	1.6244	0.00502678	zinc finger protein 271-like
FCTS_7712	1.62422	0.0014051	ddb1- and cul4-associated factor 7-like
FCTS_13354	1.62401	0.00209679	small vcp p97-interacting protein
FCTS_23489	1.62314	0.00124471	Unknown
FCTS_32523	1.62243	0.00124471	Unknown
FCTS_2241	1.62176	0.00124471	Unknown
FCTS_9726	1.62155	0.00967191	Unknown
FCTS_5552	1.62111	0.00209679	mki67 fha domain-interacting nucleolar phospho
FCTS_22187	1.61873	0.00282554	Unknown
FCTS_2608	1.61809	0.0028935	general transcription factor iih subunit 3-like
FCTS_32663	1.61793	0.00138557	Unknown
FCTS_10010	1.6176	0.00209679	zinc finger protein 511
FCTS_20255	1.61727	0.00138557	regulator of g-protein signaling 7
FCTS_17276	1.61646	0.00178787	Unknown
FCTS_20251	1.61645	0.00179791	Unknown
FCTS_31385	1.61597	0.00131	zinc transporter 5
FCTS_22518	1.61566	0.00176442	Unknown
FCTS_9511	1.61488	0.0251879	Unknown
FCTS_14106	1.6148	0.00661276	Unknown
FCTS_14148	1.61382	0.00339498	Unknown
FCTS_22523	1.6116	0.00159522	Unknown
FCTS_20573	1.61095	0.0387469	GJ14850 [Drosophila virilis]
FCTS_23454	1.60985	0.00184499	protein dead ringer-like
FCTS_6482	1.60969	0.00348466	Unknown
FCTS_13552	1.60799	0.00707259	polycomb protein sfmbt
FCTS_4079	1.60791	0.00202156	Unknown
FCTS_17096	1.60757	0.00602137	Unknown
FCTS_14365	1.6072	0.00131	Unknown
FCTS_20697	1.60665	0.0060042	Unknown
FCTS_11215	1.60604	0.00214266	Unknown
FCTS_14624	1.60604	0.00232269	Unknown
FCTS_20925	1.60596	0.00124471	c2h2 transcription factor
FCTS_15769	1.60457	0.034023	Unknown
FCTS_6105	1.60449	0.00201234	chromatin complexes subunit bap18-like isoform 1
FCTS_32869	1.60447	0.00348183	Unknown
FCTS_15534	1.60313	0.00131	Unknown
FCTS_1199	1.60298	0.00166682	actin-related protein 2
FCTS_27436	1.60271	0.00219041	phosphatidic acid phosphatase type 2b
FCTS_13806	1.60243	0.00434502	Unknown
FCTS_32134	1.60211	0.00745869	Unknown
FCTS_13579	1.60128	0.00298004	serine threonine-protein kinase fused-like
FCTS_4279	1.60044	0.00580752	ap-1 complex subunit sigma-2-like
FCTS_5859	1.59818	0.036254	tyrosine kinase
FCTS_14646	1.59741	0.00141109	Unknown
FCTS_14295	1.59688	0.00841789	PREDICTED: hypothetical protein LOC100557975 [Anolis carolinensis]
FCTS_7320	1.59684	0.00207301	poly
FCTS_11713	1.59597	0.00124471	zinc finger protein 132-like
FCTS_3863	1.59535	0.00341082	zinc finger mym-type protein 4-like
FCTS_7303	1.59402	0.00205959	n-glycosylase dna lyase-like
FCTS_3652	1.59378	0.00987071	Unknown
FCTS_32335	1.59348	0.00209679	Unknown
FCTS_29318	1.59347	0.00729019	Unknown
FCTS_30152	1.59266	0.00202026	Unknown
FCTS_4781	1.59147	0.00591523	prefoldin subunit 2
FCTS_17637	1.59099	0.00239475	Unknown
FCTS_2636	1.59061	0.00270306	Unknown
FCTS_11100	1.58961	0.00194807	Unknown
FCTS_9805	1.58947	0.00218372	probable histone acetyltransferase myst1
FCTS_12871	1.58811	0.0018291	zinc finger protein
FCTS_16046	1.58805	0.00814744	wd repeat domain phosphoinositide-interacting protein 2-like
FCTS_4327	1.58719	0.0123638	caspase partial
FCTS_3392	1.58489	0.0445268	Unknown
FCTS_639	1.58425	0.00218977	nucleoside diphosphate-linked moiety x motif mitochondrial-like
FCTS_12245	1.5842	0.00399583	Unknown
FCTS_3309	1.584	0.00465813	Unknown
FCTS_26807	1.58369	0.00312852	Unknown
FCTS_24624	1.5832	0.00244184	Unknown
FCTS_31332	1.58278	0.0133985	Unknown
FCTS_3206	1.58272	0.00820532	ras-related protein rab-2a
FCTS_8837	1.58269	0.00289276	ecdysone-induced protein 78c
FCTS_4841	1.58224	0.0159763	polycomb protein suz12
FCTS_8354	1.58132	0.00235509	Unknown
FCTS_32984	1.58121	0.00744828	Unknown
FCTS_7943	1.58096	0.00193894	Unknown
FCTS_6384	1.58023	0.00536191	Unknown
FCTS_16723	1.58012	0.00669525	Unknown
FCTS_11514	1.57983	0.0148305	plasma membrane calcium isoform j
FCTS_3401	1.57952	0.00239475	transcriptional adaptor 2
FCTS_10970	1.57942	0.00787845	Unknown
FCTS_5979	1.57795	0.00346398	zinc finger protein 429
FCTS_10011	1.5773	0.00783185	Unknown
FCTS_14885	1.57651	0.00280889	zgc:174890 protein
FCTS_10975	1.57629	0.00141155	Unknown
FCTS_2560	1.57614	0.0023091	Unknown
FCTS_3027	1.5754	0.00173039	protein strawberry notch-like
FCTS_21545	1.57526	0.00564501	probable exonuclease mut-7 homolog
FCTS_3097	1.57506	0.0157856	high-affinity copper uptake protein
FCTS_2408	1.57499	0.00444019	Unknown
FCTS_9179	1.57432	0.00383937	Unknown
FCTS_18481	1.57384	0.00216014	Unknown
FCTS_4045	1.57341	0.0202297	Unknown
FCTS_13484	1.57244	0.00209679	terminal uridylyltransferase 7
FCTS_12091	1.57184	0.00191573	set domain protein
FCTS_3351	1.56985	0.00794171	argonaute 3
FCTS_12036	1.56976	0.00131	transmembrane protein 20
FCTS_24141	1.56928	0.00900843	Unknown
FCTS_6794	1.56918	0.00850093	thiamin pyrophosphokinase
FCTS_12830	1.56802	0.00209679	Unknown
FCTS_18847	1.56769	0.0234032	probable rho gtpase-activating protein cg5521-like isoform 1
FCTS_15674	1.5675	0.00147419	regulator of chromosome condensation and btb domain containing protein 1
FCTS_16838	1.56693	0.00201234	Unknown
FCTS_4910	1.56602	0.00405498	set domain-containing protein c
FCTS_725	1.566	0.00814366	Unknown
FCTS_32352	1.56585	0.00124471	leucine-rich repeat-containing protein 40
FCTS_5902	1.56564	0.00243062	Unknown
FCTS_30963	1.56391	0.00184499	eh domain-containing protein 3
FCTS_32500	1.5616	0.00209679	Unknown
FCTS_14057	1.56118	0.0032136	atpase n2b
FCTS_18880	1.56023	0.00159522	Unknown
FCTS_9265	1.56015	0.00417903	zswim6 protein
FCTS_5797	1.55863	0.00138557	selenoprotein l
FCTS_7613	1.55863	0.00157294	Unknown
FCTS_6136	1.5584	0.00239475	cyclin-dependent kinases regulatory subunit 1-like
FCTS_12230	1.55797	0.00141477	abhydrolase domain-containing protein fam108c1-like
FCTS_815	1.55727	0.00249828	Unknown
FCTS_3712	1.55724	0.00159522	seven in absentia family protein
FCTS_19010	1.55678	0.00127993	zinc finger protein 271-like
FCTS_9131	1.55626	0.00672122	endonuclease iii-like protein 1-like
FCTS_30980	1.556	0.00315182	Unknown
FCTS_21653	1.55368	0.00209679	Unknown
FCTS_24287	1.55243	0.00780621	Unknown
FCTS_10358	1.55233	0.00651818	zinc finger protein 160
FCTS_9544	1.55102	0.00904124	pantothenate kinase
FCTS_3448	1.54949	0.00274785	cyclin-related protein fam58a-like isoform 1
FCTS_18938	1.5491	0.00218977	Unknown
FCTS_1752	1.54886	0.00226475	tigger transposable element-derived protein 4-like
FCTS_4288	1.5488	0.00888495	exonuclease 1
FCTS_19119	1.54853	0.00163786	Unknown
FCTS_1944	1.54792	0.00346435	golgin subfamily a member 6-like protein 1- partial
FCTS_16095	1.54778	0.00334171	e3 ubiquitin-protein ligase rglg2
FCTS_788	1.54726	0.00691531	ribosome biogenesis protein wdr12 homolog
FCTS_6989	1.54675	0.00208158	Unknown
FCTS_27355	1.54669	0.00312852	Unknown
FCTS_11843	1.54637	0.00384528	Unknown
FCTS_8359	1.54627	0.00452013	Unknown
FCTS_817	1.54583	0.00369858	myosin xv
FCTS_3509	1.5455	0.00205512	motile sperm domain-containing protein 1-like
FCTS_25674	1.54546	0.00138557	btb domain containing 1
FCTS_8188	1.54382	0.00138557	saga-associated factor 29 homolog
FCTS_10336	1.54359	0.00444019	Unknown
FCTS_29027	1.54293	0.00159522	zinc finger protein 561
FCTS_2944	1.54282	0.00558344	Unknown
FCTS_10037	1.54276	0.00157861	Unknown
FCTS_3851	1.54249	0.00197807	enolase-phosphatase e1
FCTS_14607	1.54146	0.00793466	Unknown
FCTS_1469	1.54103	0.00179791	caspase 8
FCTS_9412	1.54094	0.0123244	Unknown
FCTS_9248	1.53907	0.00653571	transport and golgi organization protein 11
FCTS_10583	1.53894	0.00640665	Unknown
FCTS_13003	1.5386	0.00210814	Unknown
FCTS_13744	1.53754	0.00164336	m-phase inducer phosphatase 2
FCTS_10997	1.53637	0.00484588	Unknown
FCTS_5633	1.53517	0.00762123	Unknown
FCTS_838	1.53456	0.0241106	Unknown
FCTS_6778	1.53382	0.00191573	ruvb-like 1-like
FCTS_10308	1.53371	0.010938	Unknown
FCTS_22516	1.53322	0.00973829	adenylate cyclase
FCTS_11294	1.53304	0.00451852	sentrin sumo-specific protease senp7
FCTS_2999	1.53293	0.00541747	28s ribosomal protein mitochondrial
FCTS_9603	1.53249	0.00369298	Unknown
FCTS_5729	1.532	0.00955645	g1 s-specific cyclin c
FCTS_28607	1.53175	0.00240001	Unknown
FCTS_8288	1.53173	0.0123432	Unknown
FCTS_10724	1.5315	0.0043566	Unknown
FCTS_7091	1.53138	0.0298969	cdk5 regulatory subunit associated protein 1-like 1
FCTS_27842	1.53096	0.00393811	Unknown
FCTS_1704	1.53063	0.0275034	polycomb group ring finger protein 3-like
FCTS_6196	1.52918	0.0258217	Unknown
FCTS_8099	1.52879	0.00184661	trna guanosine-2 -o-methyltransferase trm11 homolog
FCTS_11627	1.52855	0.00400557	protein opi10 homolog
FCTS_13098	1.52851	0.00249656	mitochondrial import inner membrane translocase subunit tim22-like
FCTS_4133	1.52799	0.00131	daxx protein
FCTS_10228	1.52782	0.00558229	protein kiaa0317-like
FCTS_2780	1.5273	0.00200237	Unknown
FCTS_10511	1.52725	0.00298542	phosphatidylinositol-4-phosphate 5-kinase type-2
FCTS_1951	1.52713	0.00268277	h aca ribonucleoprotein complex subunit 2-like
FCTS_9285	1.5267	0.00673795	glucose dehydrogenase
FCTS_8956	1.5264	0.00180681	Unknown
FCTS_5404	1.52634	0.00670925	dna replication licensing factor mcm5
FCTS_7884	1.52495	0.00517344	Unknown
FCTS_442	1.5247	0.0062682	Unknown
FCTS_22813	1.52461	0.00184499	Unknown
FCTS_18160	1.52455	0.00232296	meiotic nuclear division protein 1 homolog
FCTS_6421	1.5242	0.025248	seven in absentia
FCTS_12414	1.52411	0.00315182	Unknown
FCTS_14897	1.5236	0.0149636	poly -specific ribonuclease (deadenylation nuclease)
FCTS_1418	1.52344	0.00202236	Unknown
FCTS_10815	1.52331	0.00607591	novel protein vertebrate family with sequence similarity member a1
FCTS_12891	1.52315	0.00529102	hedgehog receptor patched
FCTS_14817	1.52205	0.00193894	Unknown
FCTS_24216	1.52198	0.00209679	Unknown
FCTS_28067	1.52173	0.00819647	otu domain containing 3
FCTS_10873	1.5216	0.00131	oocyte zinc finger protein 6-like
FCTS_15743	1.5212	0.00329537	Unknown
FCTS_33924	1.52075	0.00124471	zinc finger
FCTS_1392	1.5182	0.00674079	probable rna-binding protein orb2-like
FCTS_3140	1.51795	0.00142018	protein arv1
FCTS_6949	1.51728	0.0225978	dual specificity mitogen-activated protein kinase kinase 7
FCTS_17121	1.51684	0.0084318	zinc finger protein
FCTS_5839	1.51647	0.00345183	max gene-associated protein
FCTS_33018	1.51587	0.00124471	Unknown
FCTS_13765	1.51507	0.00139072	wd repeat-containing protein 24
FCTS_14042	1.51459	0.00179791	Unknown
FCTS_4753	1.51437	0.00974874	e3 sumo-protein ligase nse2-like
FCTS_8843	1.51435	0.00465145	Unknown
FCTS_3464	1.51432	0.00657023	dna polymerase epsilon subunit 3
FCTS_31030	1.51393	0.0290023	Unknown
FCTS_3444	1.51362	0.00368085	Unknown
FCTS_9847	1.51361	0.0027087	trm5 trna methyltransferase 5 homolog ( cerevisiae) isoform cra a
FCTS_7727	1.51268	0.00347037	geranylgeranyl pyrophosphate synthase-like
FCTS_22159	1.5119	0.00522057	Unknown
FCTS_581	1.5112	0.00212463	transcription initiation factor tfiid subunit 12
FCTS_3869	1.51094	0.00530867	Unknown
FCTS_21645	1.5108	0.00131	Unknown
FCTS_2751	1.51074	0.00306223	dual oxidase 1
FCTS_2580	1.50979	0.00193894	dna-directed rna polymerase iii subunit rpc8
FCTS_1798	1.50971	0.0165762	tfiih basal transcription factor complex helicase xpd subunit-like
FCTS_2617	1.50887	0.00193894	rna helicase sde3
FCTS_2021	1.50853	0.00193894	Unknown
FCTS_32217	1.50826	0.0062434	Unknown
FCTS_8487	1.50797	0.00317714	2-aminoethanethiol dioxygenase
FCTS_34585	1.507	0.00374358	low quality protein: zinc finger protein 292-like
FCTS_5667	1.50635	0.00761003	filamentous hemagglutinin family n-terminal domain protein
FCTS_19049	1.506	0.00218977	Unknown
FCTS_10209	1.50584	0.00206889	zinc finger and btb domain-containing protein 6
FCTS_9997	1.50584	0.00164336	PREDICTED: hypothetical protein LOC100571332, partial [Acyrthosiphon pisum]
FCTS_20853	1.50565	0.00218977	Unknown
FCTS_9565	1.5055	0.00193894	Unknown
FCTS_4721	1.50408	0.020071	serine threonine kinase 40
FCTS_27528	1.50339	0.00138557	Unknown
FCTS_17244	1.5023	0.00223884	Unknown
FCTS_5312	1.50186	0.00388161	fanconi-associated nuclease 1
FCTS_7202	1.50156	0.0153803	rhomboid-related protein 3-like
FCTS_9885	1.50143	0.00425392	Unknown
FCTS_12852	1.50069	0.00124471	negative elongation factor b-like
FCTS_2824	1.50066	0.00767246	e3 ubiquitin-protein ligase trim33
FCTS_34199	1.50027	0.00288345	protein o-mannosyltransferase 1-like
FCTS_12439	1.49996	0.00651151	inhibitor of growth protein 1-like
FCTS_5099	1.49819	0.00201234	lamin dm0-like
FCTS_2229	1.49813	0.00651151	dna-directed rna polymerase iii subunit rpc3-like
FCTS_14464	1.49754	0.0262536	Unknown
FCTS_6576	1.49665	0.0275356	membrane-associated guanylate kinase
FCTS_26677	1.49664	0.00247356	Unknown
FCTS_30066	1.49631	0.00564863	Unknown
FCTS_12825	1.49629	0.00227838	Unknown
FCTS_7815	1.49569	0.0255886	Unknown
FCTS_3230	1.49518	0.0126288	Unknown
FCTS_2240	1.49378	0.00514159	zinc finger protein
FCTS_10213	1.49365	0.0159803	Unknown
FCTS_18476	1.49275	0.00194232	Unknown
FCTS_14871	1.4927	0.00298004	Unknown
FCTS_9618	1.49266	0.00138557	Unknown
FCTS_2347	1.49257	0.00205986	plasma alpha-l-fucosidase
FCTS_7784	1.4925	0.00334171	protein o-mannosyltransferase 1-like
FCTS_5852	1.49214	0.00202575	nibrin
FCTS_16364	1.49202	0.00819595	low quality protein: neogenin-like
FCTS_10194	1.49178	0.00270998	Unknown
FCTS_19269	1.49108	0.00387513	Unknown
FCTS_10409	1.49107	0.00131	Unknown
FCTS_5665	1.49097	0.0490738	integrator complex subunit 2
FCTS_9219	1.49011	0.00124471	Unknown
FCTS_5778	1.48976	0.00612429	Unknown
FCTS_18642	1.48884	0.0134719	heterogeneous nuclear ribonucleoprotein u-like protein 1
FCTS_2331	1.48872	0.00660226	ring finger protein 115
FCTS_3249	1.48831	0.00158565	actin-binding protein
FCTS_9086	1.48792	0.00157294	y150 brasb ame: full=upf0314 protein bbta 0150
FCTS_17640	1.48768	0.00138557	ubiquitin-protein ligase
FCTS_6422	1.48677	0.00328788	tudor domain-containing protein 12-like
FCTS_19942	1.48572	0.00700284	Unknown
FCTS_10644	1.48567	0.0061378	Unknown
FCTS_9675	1.48522	0.00367481	sortilin-related receptor-like
FCTS_19904	1.48502	0.00266719	probable palmitoyltransferase zdhhc6-like
FCTS_5322	1.4843	0.00882851	snare protein sed5 syntaxin 5
FCTS_8158	1.48393	0.00141609	high-affinity camp-specific and ibmx-insensitive 3 -cyclic
FCTS_21266	1.48303	0.00420925	Unknown
FCTS_30703	1.48243	0.00147419	tpr domain-containing protein
FCTS_12143	1.48226	0.00950289	Unknown
FCTS_21347	1.48211	0.00699614	Unknown
FCTS_7907	1.48201	0.0205295	Unknown
FCTS_14424	1.48194	0.00297324	Unknown
FCTS_4679	1.48189	0.00891694	Unknown
FCTS_15153	1.48185	0.00142018	Unknown
FCTS_8446	1.48147	0.0147009	hexaprenyl pyrophosphate
FCTS_5896	1.48123	0.0117344	histone acetyltransferase type b catalytic subunit-like
FCTS_9172	1.4812	0.0198389	neuroendocrine convertase 1-like
FCTS_6142	1.48019	0.00444019	zinc finger protein partial
FCTS_12722	1.47945	0.011629	Unknown
FCTS_956	1.47921	0.00193894	gpn-loop gtpase 3-like
FCTS_11680	1.47897	0.00200469	Unknown
FCTS_2851	1.47798	0.00720569	agap000415-pa isoform 2
FCTS_29183	1.47777	0.00230046	Unknown
FCTS_11571	1.47773	0.00878654	Unknown
FCTS_3896	1.47766	0.0029356	protein piwi-like
FCTS_2070	1.47724	0.0154551	eukaryotic translation initiation factor 3 subunit j
FCTS_11179	1.47724	0.00213941	Unknown
FCTS_6227	1.47641	0.00482031	Unknown
FCTS_28543	1.47627	0.00765826	Unknown
FCTS_12754	1.47621	0.00223604	dead-box helicase dbp80
FCTS_28270	1.47515	0.00348466	Unknown
FCTS_12007	1.47423	0.0336002	facilitated trehalose transporter tret1-like
FCTS_3455	1.474	0.0218153	Unknown
FCTS_3041	1.47276	0.00216014	udp-galactose transporter
FCTS_5278	1.47264	0.0157843	nuclear pore complex protein nup93 isoform 1
FCTS_9873	1.47249	0.0270392	Unknown
FCTS_18101	1.47152	0.00474134	hypothetical protein G5I 10126 [Acromyrmex echinatior]
FCTS_17220	1.4713	0.00247356	Unknown
FCTS_13975	1.47065	0.00232269	pci domain-containing protein 2
FCTS_13830	1.47045	0.00209679	Unknown
FCTS_6087	1.47039	0.00802694	suppressor of hairless protein partial
FCTS_18821	1.47031	0.00147578	Unknown
FCTS_9556	1.46868	0.00846065	Unknown
FCTS_1124	1.46836	0.00138557	extracellular sulfatase sulf-1 homolog
FCTS_14492	1.46795	0.00256375	tfiih basal transcription factor complex p52 subunit
FCTS_85	1.46623	0.00289276	n-alpha-acetyltransferase catalytic subunit-like
FCTS_11218	1.46614	0.00553104	Unknown
FCTS_5443	1.46562	0.00420613	Unknown
FCTS_8765	1.46467	0.00147419	loss of heterozygosity 11 chromosomal region 2 gene a protein homolog
FCTS_5841	1.46435	0.0361222	protein transport protein sec61 subunit gamma
FCTS_15496	1.46428	0.00159522	casein kinase i isoform alpha isoform 1
FCTS_10973	1.46412	0.00612722	Unknown
FCTS_820	1.46407	0.010343	histone-lysine n-methyltransferase e -like isoform 1
FCTS_1809	1.4633	0.00686225	protein dpy-30 homolog
FCTS_6668	1.46237	0.0171909	elongation of very long chain fatty acids protein 6-like
FCTS_523	1.46082	0.00251237	gtpase mitochondrial
FCTS_12331	1.46078	0.00475147	zinc finger protein 160 isoform 2
FCTS_21811	1.46063	0.00161021	Unknown
FCTS_15447	1.45926	0.00193894	Unknown
FCTS_26272	1.45893	0.00260754	solute carrier family 23 member 1-like
FCTS_6067	1.45816	0.00788139	protein fam136a
FCTS_946	1.45797	0.00346435	uncharacterized methyltransferase wbscr22-like
FCTS_20730	1.45696	0.00131	Unknown
FCTS_6805	1.45667	0.00548778	Unknown
FCTS_15116	1.45621	0.00186763	n -dimethylguanosine trna methyltransferase
FCTS_4541	1.45539	0.0078353	gastrula zinc finger protein - partial
FCTS_2150	1.4551	0.0138419	zinc finger protein 280c
FCTS_34071	1.45443	0.00157294	Unknown
FCTS_23040	1.45357	0.00675717	Unknown
FCTS_13001	1.4524	0.00456585	Unknown
FCTS_4612	1.45203	0.00227319	Unknown
FCTS_18457	1.45151	0.00265192	probable multidrug resistance-associated protein lethal 03659-like
FCTS_5292	1.4514	0.00315504	Unknown
FCTS_13131	1.45129	0.00182759	Unknown
FCTS_12356	1.45127	0.00565355	Unknown
FCTS_7715	1.45105	0.00661996	very acidic salivary protein
FCTS_5183	1.45105	0.0028935	probable sulfite mitochondrial-like
FCTS_8502	1.45042	0.00599171	gtpase rho
FCTS_23903	1.45014	0.00239475	Unknown
FCTS_26961	1.44968	0.0158902	Unknown
FCTS_4006	1.44935	0.00179791	zinc finger cchc domain-containing protein 2
FCTS_11134	1.44888	0.00301133	Unknown
FCTS_7253	1.44875	0.0034495	isoform d
FCTS_8945	1.44871	0.00173039	Unknown
FCTS_448	1.44857	0.00205986	transcription elongation factor s-ii
FCTS_11261	1.44803	0.0032136	protein diaphanous
FCTS_9865	1.44713	0.00288156	Unknown
FCTS_25836	1.44538	0.0103644	Unknown
FCTS_4048	1.44494	0.00207953	peptidyl-prolyl cis-trans isomerase sdccag10
FCTS_5887	1.4448	0.00208363	Unknown
FCTS_12119	1.44397	0.0081622	Unknown
FCTS_9869	1.44367	0.00625584	nedd4-binding protein 2-like 1-like
FCTS_12840	1.44357	0.0120382	Unknown
FCTS_651	1.44283	0.0228945	Unknown
FCTS_28003	1.44273	0.00213139	Unknown
FCTS_6325	1.44211	0.00159522	btb poz domain-containing protein 2-like
FCTS_11132	1.4419	0.00920437	ribonucleases p mrp protein subunit pop1-like
FCTS_1674	1.44183	0.00437001	high affinity cationic amino acid transporter 1
FCTS_21885	1.44145	0.00397007	progesterone immunomodulatory binding factor 1
FCTS_3353	1.44096	0.00755928	Unknown
FCTS_4330	1.44027	0.0188169	Unknown
FCTS_15345	1.43992	0.00131	Unknown
FCTS_8246	1.43968	0.0024118	gata zinc finger domain containing 1
FCTS_29481	1.43954	0.00193894	Unknown
FCTS_1175	1.43931	0.00353174	Unknown
FCTS_2971	1.43915	0.00162932	low quality protein: merlin-like
FCTS_15044	1.43909	0.00781332	Unknown
FCTS_6424	1.43905	0.00190783	GA17939 [Drosophila pseudoobscura pseudoobscura]
FCTS_4832	1.43855	0.00495357	leucine-rich repeat protein soc-2 homolog
FCTS_881	1.43706	0.0103852	protein phosphatase 2c
FCTS_32294	1.43644	0.00371871	Unknown
FCTS_375	1.43492	0.0125638	pak-interacting exchange beta-pix cool-1
FCTS_28770	1.4344	0.00457307	Unknown
FCTS_32978	1.43387	0.00180681	Unknown
FCTS_22476	1.43359	0.0026383	Unknown
FCTS_690	1.43336	0.00664154	actin-related protein 8-like
FCTS_5236	1.43314	0.00264674	n-alpha-acetyltransferase auxiliary subunit-like
FCTS_20378	1.43249	0.00657021	Unknown
FCTS_3616	1.43222	0.00309576	26s proteasome non-atpase regulatory subunit 13
FCTS_29886	1.43166	0.00306685	Unknown
FCTS_11336	1.43142	0.00382112	multidrug resistance-associated protein 4-like
FCTS_8322	1.43078	0.00471999	proteasome 26s subunit atpase 3 interacting protein variant 1
FCTS_12374	1.43072	0.0054334	Unknown
FCTS_10149	1.43069	0.00290246	Unknown
FCTS_6893	1.43026	0.00167875	protein slc7a6os-like
FCTS_1623	1.43002	0.00887899	Unknown
FCTS_18420	1.42905	0.00202026	Unknown
FCTS_4675	1.42896	0.00294061	zinc finger protein 87
FCTS_26950	1.42855	0.00202026	Unknown
FCTS_1873	1.42855	0.00872575	Unknown
FCTS_7612	1.42851	0.00308976	GI15535 [Drosophila mojavensis]
FCTS_8381	1.42758	0.00432921	zinc finger mynd domain-containing protein 17
FCTS_10718	1.42735	0.0227125	Unknown
FCTS_22215	1.427	0.00298977	zinc finger protein 53-like
FCTS_6201	1.42699	0.0287808	chromobox protein homolog 1-like
FCTS_9947	1.42676	0.0103644	protein fam116a-like
FCTS_13995	1.4267	0.00533521	Unknown
FCTS_91	1.42627	0.00715868	Unknown
FCTS_14119	1.42601	0.00268277	Unknown
FCTS_9837	1.4257	0.0225978	zinc finger protein
FCTS_17311	1.42555	0.00230046	tho complex subunit 1-like
FCTS_11869	1.42521	0.00515087	rb-associated krab zinc finger protein
FCTS_5112	1.42464	0.0137639	Unknown
FCTS_559	1.4245	0.0236555	isoform e
FCTS_20106	1.42424	0.00205449	factor viii intron 22 protein
FCTS_5750	1.42419	0.00127993	n-methylpurine-dna glycosylase
FCTS_2230	1.42391	0.00171482	ph-d
FCTS_3530	1.42363	0.00643075	Unknown
FCTS_4214	1.42362	0.032007	mitochondrial ribosomal
FCTS_9707	1.4236	0.00216014	probable chitinase 2-like
FCTS_17842	1.42309	0.0037327	Unknown
FCTS_7163	1.423	0.00374358	cdk-activating kinase assembly factor mat1-like
FCTS_10265	1.42248	0.00889839	hypothetical protein DAPPUDRAFT 306011 [Daphnia pulex]
FCTS_9776	1.42233	0.00902495	swi snf-related matrix-associated actin-dependent regulator of chromatin subfamily a-like protein 1-like
FCTS_26813	1.42217	0.00171482	Unknown
FCTS_11779	1.42176	0.00458959	tetratricopeptide repeat protein 19 mitochondrial-like
FCTS_6635	1.41953	0.00587524	translation initiation factor eif-2b subunit delta-like
FCTS_9173	1.41935	0.00681252	udp-glucuronosyltransferase 1-8
FCTS_5882	1.41899	0.00558843	cg33099 cg33099-pa
FCTS_22489	1.41771	0.0085547	unnamed protein product [Blastocystis hominis]
FCTS_30502	1.41763	0.00288156	Unknown
FCTS_1370	1.41699	0.00876568	6-phosphogluconate decarboxylating
FCTS_17687	1.41692	0.00562803	Unknown
FCTS_986	1.41688	0.0070396	ubiquitin-conjugating enzyme e2 t
FCTS_5350	1.41683	0.0173812	epidermal retinol dehydrogenase 2-like
FCTS_4131	1.41667	0.00197168	protein phosphatase-5
FCTS_21860	1.41665	0.0111724	Unknown
FCTS_11658	1.41582	0.00124471	phosphatidate phosphatase
FCTS_15504	1.41576	0.00147734	Unknown
FCTS_5109	1.41507	0.0105869	cd9 antigen-like
FCTS_12749	1.41498	0.00297331	Unknown
FCTS_6631	1.41449	0.00127993	dc2 protein
FCTS_17626	1.41393	0.00216014	n -dimethylguanosine trna methyltransferase
FCTS_6738	1.41336	0.00471122	Unknown
FCTS_8821	1.41333	0.00345977	riken cdna isoform cra b
FCTS_2799	1.4133	0.00661996	Unknown
FCTS_8621	1.41302	0.00210838	ariadne ubiquitin-conjugating enzyme e2 binding protein
FCTS_31353	1.41272	0.00131	mitochondrial ribosomal protein
FCTS_10872	1.41261	0.00610194	wd repeat-containing protein 47-like
FCTS_5848	1.41169	0.00209679	phosphatidylinositol-glycan biosynthesis class x protein isoform 2 precursor
FCTS_18068	1.41108	0.00974117	dna polymerase kappa
FCTS_8506	1.41031	0.00538343	Unknown
FCTS_10792	1.4101	0.00904124	Unknown
FCTS_961	1.41004	0.00427384	protein shq1 homolog
FCTS_20228	1.40963	0.00315182	Unknown
FCTS_20371	1.4092	0.00376552	zgc:174288 protein
FCTS_16939	1.40917	0.00124471	Unknown
FCTS_10798	1.40907	0.00935136	Unknown
FCTS_3254	1.40903	0.00543432	PREDICTED: hypothetical protein [Strongylocentrotus purpuratus]
FCTS_227	1.40755	0.00892207	epoxide hydrolase 4
FCTS_8388	1.40751	0.00341082	Unknown
FCTS_17503	1.40707	0.00241737	Unknown
FCTS_1874	1.40622	0.00714683	protein roadkill-like
FCTS_1428	1.40619	0.00147419	dna replication complex gins protein psf1-like
FCTS_7311	1.40573	0.00425876	integrator complex subunit 9
FCTS_15446	1.40472	0.00309133	exonuclease 1-like
FCTS_19817	1.40469	0.00138557	Unknown
FCTS_1134	1.40436	0.0120467	predicted protein [Capsaspora owczarzaki ATCC 30864]
FCTS_787	1.4031	0.00206889	Unknown
FCTS_3691	1.40188	0.00602137	hypothetical protein DAPPUDRAFT 301562 [Daphnia pulex]
FCTS_19384	1.40174	0.00143855	choline dehydrogenase
FCTS_30289	1.40119	0.0043566	Unknown
FCTS_7584	1.40051	0.00516633	probable ribonuclease zc3h12d-like
FCTS_2997	1.40048	0.00686678	Unknown
FCTS_24089	1.39892	0.00157294	Unknown
FCTS_13431	1.39862	0.0133875	tpa inf: alpha-parvin
FCTS_20088	1.39846	0.00607591	Unknown
FCTS_2878	1.3982	0.00376261	hypothetical protein [Amblyomma maculatum]
FCTS_8399	1.39782	0.00243076	bloody fingers
FCTS_22543	1.3972	0.00444383	protein roadkill
FCTS_22301	1.39675	0.00337383	pr domain zinc finger protein 4
FCTS_3546	1.39429	0.00866959	PREDICTED: predicted protein-like [Saccoglossus kowalevskii]
FCTS_1612	1.39421	0.0395575	transcription factor iiia
FCTS_1357	1.39416	0.00280889	ctd nuclear envelope phosphatase 1
FCTS_2619	1.39397	0.00610158	serine threonine protein kinase bri1-like protein
FCTS_3872	1.3937	0.00427296	Unknown
FCTS_2698	1.39367	0.00329502	Unknown
FCTS_2064	1.39362	0.0209383	gram domain-containing protein 1b
FCTS_20213	1.39308	0.00507828	Unknown
FCTS_13568	1.3919	0.0134942	Unknown
FCTS_12897	1.39177	0.00722537	nf-kappa-b-repressing factor
FCTS_6034	1.39085	0.0062682	gem-associated protein 5-like
FCTS_29935	1.39066	0.00147419	Unknown
FCTS_25271	1.38904	0.00216014	zinc finger protein 221
FCTS_22663	1.38854	0.0196005	Unknown
FCTS_7837	1.38727	0.017123	novel protein
FCTS_10820	1.38578	0.00155663	selenophosphate synthetase
FCTS_15532	1.38574	0.00376819	dymeclin-like isoform 2
FCTS_5032	1.3856	0.0102123	isoform d
FCTS_18652	1.38251	0.00232269	Unknown
FCTS_27906	1.38182	0.00138557	Unknown
FCTS_5894	1.38119	0.00637642	kiaa0152 homolog precursor
FCTS_13766	1.38115	0.00341082	Unknown
FCTS_4197	1.38105	0.00584853	pdz binding kinase
FCTS_8725	1.38104	0.00451164	probable protein phosphatase 2c -like
FCTS_8988	1.38069	0.00209679	Unknown
FCTS_9882	1.38013	0.00259965	pre-mrna-processing factor 19
FCTS_13139	1.37983	0.0128791	Unknown
FCTS_18684	1.37976	0.0313915	nucleolar protein 10-like
FCTS_9925	1.37942	0.00268277	stip1-like proteiny and u box-containing protein 1
FCTS_20240	1.37916	0.00419807	vacuolar fusion protein mon1 homolog a-like
FCTS_17993	1.37879	0.00388816	Unknown
FCTS_31569	1.37878	0.00870926	guanylate cyclase soluble subunit beta-1-like
FCTS_32425	1.37788	0.00239475	dna polymerase delta catalytic subunit
FCTS_27538	1.37774	0.00131	zinc finger protein
FCTS_15058	1.37742	0.00138557	syntaxin-16-like isoform 4
FCTS_5860	1.37666	0.0154951	histone-lysine n-methyltransferase suv4-20
FCTS_5128	1.37661	0.0153785	wd repeat-containing protein 82-like
FCTS_23364	1.37622	0.0232657	Unknown
FCTS_5082	1.37594	0.0016431	Unknown
FCTS_7828	1.37544	0.00191573	nischarin-like
FCTS_2822	1.37489	0.00289276	transmembrane 9 superfamily protein member 4
FCTS_22152	1.37367	0.00159522	broad-complex isoform a-z3
FCTS_3327	1.37218	0.00362579	tumor protein p53 binding protein 1
FCTS_7107	1.37169	0.00657021	zinc finger protein
FCTS_4136	1.37134	0.00186763	nadph:adrenodoxin mitochondrial
FCTS_11002	1.37132	0.00788286	Unknown
FCTS_246	1.37131	0.0139886	cofilin actin-depolymerizing factor homolog
FCTS_25824	1.37038	0.00218977	Unknown
FCTS_17458	1.37017	0.00340091	Unknown
FCTS_28984	1.3698	0.00138557	Unknown
FCTS_9974	1.36952	0.0148065	hypothetical protein EAI 10765 [Harpegnathos saltator]
FCTS_18198	1.36951	0.00202026	Unknown
FCTS_2920	1.36927	0.00666421	Unknown
FCTS_26888	1.36924	0.00248777	Unknown
FCTS_17750	1.36855	0.00200237	Unknown
FCTS_1793	1.36755	0.0410013	coiled-coil-helix-coiled-coil-helix domain-containing
FCTS_6243	1.3671	0.0129166	roco5 dicdi ame: full=probable serine threonine-protein kinase roco5 ame: full=ras of complex proteins and c-terminal of roc 5
FCTS_11347	1.3668	0.00623855	zinc finger protein 84
FCTS_6024	1.36672	0.00528764	zinc finger bed domain-containing protein 1-like
FCTS_4633	1.36616	0.00498998	protein peanut-like
FCTS_13008	1.36545	0.00395498	protein roadkill-like
FCTS_13999	1.36531	0.00518416	endonuclease reverse transcriptase
FCTS_9112	1.36485	0.00280185	suppression of tumorigenicity
FCTS_7328	1.36464	0.00257623	trna-specific adenosine deaminase 1-like
FCTS_21537	1.36433	0.00216014	Unknown
FCTS_1604	1.3643	0.00548778	protein cornichon homolog 4-like
FCTS_3866	1.36357	0.00757257	upf0568 protein c14orf166 homolog
FCTS_626	1.36319	0.027689	dead box atp-dependent rna helicase
FCTS_22774	1.36294	0.00179791	gpi ethanolamine phosphate transferase 2-like
FCTS_18278	1.36275	0.00322787	nucleoporin-like protein 2
FCTS_9403	1.36251	0.00209679	multidrug resistance-associated protein 4-like
FCTS_12453	1.36243	0.0182276	Unknown
FCTS_3621	1.36161	0.0410582	Unknown
FCTS_21109	1.36045	0.00283288	Unknown
FCTS_16133	1.36038	0.00305724	zinc finger
FCTS_14528	1.36016	0.00263843	Unknown
FCTS_18114	1.36006	0.00243076	Unknown
FCTS_8816	1.35983	0.00224596	hypothetical protein M7I 7524 [Glarea lozoyensis 74030]
FCTS_4662	1.35899	0.0106275	pyroglutamyl-peptidase 1
FCTS_14905	1.35794	0.00301593	dna primase large subunit
FCTS_10675	1.35777	0.00164336	Unknown
FCTS_5802	1.35735	0.00447527	atpase family aaa domain-containing protein 3
FCTS_8829	1.35718	0.00525007	Unknown
FCTS_4698	1.357	0.00124471	sam domain and hd domain 1
FCTS_23007	1.35665	0.00289483	chromobox protein homolog 1
FCTS_5122	1.35662	0.00239475	Unknown
FCTS_6896	1.3566	0.0196061	Unknown
FCTS_9698	1.35648	0.00439206	low quality protein: de-cadherin-like
FCTS_4580	1.35622	0.00357334	transcription initiation factor tfiid subunit 10
FCTS_31638	1.35613	0.0034495	Unknown
FCTS_8448	1.35591	0.00162932	retinoblastoma binding protein 4
FCTS_7281	1.35552	0.0174457	fch domain only protein 2-like isoform 1
FCTS_5378	1.35545	0.00403308	isoform a
FCTS_18157	1.35481	0.00298977	Unknown
FCTS_11908	1.35419	0.0243181	Unknown
FCTS_9650	1.35314	0.0116093	gdnf-inducible zinc finger protein 1
FCTS_1893	1.35295	0.00301658	armadillo segment polarity
FCTS_3329	1.3528	0.00490946	nbp2b protein
FCTS_34592	1.35257	0.0101526	Unknown
FCTS_21142	1.35235	0.0175783	Unknown
FCTS_3768	1.35225	0.00533044	Unknown
FCTS_7970	1.35122	0.0130821	zinc finger protein 271-like
FCTS_16422	1.35103	0.00561304	Unknown
FCTS_10223	1.35039	0.00239475	trna (cytosine-5-)-methyltransferase
FCTS_16948	1.35015	0.00942807	Unknown
FCTS_14532	1.35007	0.00252874	Unknown
FCTS_7645	1.34985	0.00714683	isoform a
FCTS_8004	1.34965	0.00319628	lethal isoform a
FCTS_12554	1.34952	0.00200168	riboflavin transporter 2-like
FCTS_6963	1.34935	0.00523491	wd repeat-containing protein 6
FCTS_2404	1.34897	0.00283164	Unknown
FCTS_17423	1.34818	0.00194232	Unknown
FCTS_9379	1.34711	0.00662901	tel2-interacting protein 1 homolog
FCTS_4921	1.34701	0.00315182	Unknown
FCTS_10452	1.34676	0.0034828	Unknown
FCTS_29454	1.34631	0.00321185	Unknown
FCTS_7535	1.34628	0.00558113	nicotinamide mononucleotide adenylyltransferase 1
FCTS_1766	1.34616	0.00194807	cytochrome oxidase biogenesis protein (oxa1 mitochondrial)
FCTS_19316	1.34596	0.00226692	vacuolar protein sorting-associated protein 33b
FCTS_7383	1.3456	0.0191037	serine arginine rich splicing factor
FCTS_6202	1.34515	0.00225835	rcc1 and btb domain-containing protein 1
FCTS_15501	1.34469	0.00220823	zinc finger protein partial
FCTS_6438	1.34444	0.00942807	transcriptional adapter 3-b-like
FCTS_13591	1.34367	0.00239475	Unknown
FCTS_3388	1.34365	0.00159522	zinc finger protein
FCTS_16141	1.34364	0.00227319	Unknown
FCTS_8868	1.34356	0.00278411	Unknown
FCTS_12170	1.34315	0.00582386	peptidyl-prolyl cis-trans isomerase fkbp6-like
FCTS_19172	1.34297	0.00171482	dep domain-containing protein 1b
FCTS_23599	1.34236	0.00131	acyl- delta desaturase-like
FCTS_21234	1.34233	0.00138557	Unknown
FCTS_2612	1.34067	0.00201234	chromobox protein homolog 1
FCTS_9937	1.34063	0.0434043	hypothetical protein BRAFLDRAFT 66300 [Branchiostoma floridae]
FCTS_7059	1.34019	0.00306685	zinc finger protein 64
FCTS_32546	1.33986	0.0350184	Unknown
FCTS_427	1.33963	0.00124471	cornichon protein
FCTS_10608	1.33962	0.00449801	tar rna binding protein
FCTS_911	1.33958	0.00238038	gamma-tubulin complex component 6-like
FCTS_5430	1.33947	0.00362148	60s acidic ribosomal protein
FCTS_5137	1.33861	0.00643289	tbcc domain-containing protein 1
FCTS_26474	1.338	0.00216014	class a rhodopsin-like g-protein coupled receptor
FCTS_1536	1.3378	0.00147419	protein hu-li tai shao
FCTS_16137	1.33748	0.00267432	flap endonuclease 1
FCTS_13031	1.33704	0.00191573	Unknown (protein for IMAGE:7693854) [Xenopus (Silurana) tropicalis]
FCTS_12927	1.33703	0.00389858	80 kda mcm3-associated protein
FCTS_12495	1.33658	0.0117077	Unknown
FCTS_7518	1.33591	0.0129149	btb poz domain-containing protein 2
FCTS_20887	1.33578	0.00202026	u3 small nucleolar rna-associated protein 15 homolog
FCTS_4441	1.33568	0.00304692	hypothetical protein DAPPUDRAFT 224227 [Daphnia pulex]
FCTS_4714	1.33556	0.00918437	oligopeptide transporter
FCTS_31558	1.33447	0.00131	zinc finger protein 34
FCTS_7463	1.33417	0.00178897	poly -specific ribonuclease parn-like domain-containing protein 1
FCTS_29159	1.33408	0.00197807	leucine-rich repeat-containing protein 9
FCTS_15706	1.33296	0.00250765	Unknown
FCTS_8875	1.33235	0.00180681	autophagy-specific gene 4
FCTS_34290	1.33208	0.00237295	Unknown
FCTS_29669	1.33191	0.00124471	swi snf matrix actin dependent regulator of subfamily member 1
FCTS_26566	1.33161	0.00149628	cell division cycle protein 16 homolog
FCTS_4656	1.33149	0.00806318	Unknown
FCTS_6434	1.33098	0.0101484	zinc finger protein 271-like
FCTS_14397	1.32972	0.00410287	Unknown
FCTS_29423	1.32957	0.00200168	Unknown
FCTS_9773	1.32948	0.00218977	peptidyl-prolyl cis-trans isomerase h
FCTS_250	1.32947	0.010871	conserved hypothetical protein [Culex quinquefasciatus]
FCTS_14953	1.32921	0.0111533	Unknown
FCTS_7337	1.32834	0.00496372	dynein light chain axonemal
FCTS_14847	1.32799	0.00214268	upf0406 protein c16orf57 homolog
FCTS_31639	1.32718	0.00882851	Unknown
FCTS_16503	1.32686	0.00200237	ring-finger partial
FCTS_4559	1.32673	0.00376521	Unknown
FCTS_18943	1.32672	0.00315102	Unknown
FCTS_4724	1.32631	0.00734523	isoform a
FCTS_12257	1.32612	0.00333154	protein roadkill-like
FCTS_7137	1.32566	0.00247321	pdz binding kinase
FCTS_4797	1.32555	0.0258135	Unknown
FCTS_8576	1.32357	0.00278411	transmembrane protein 41a
FCTS_10773	1.3235	0.0225205	Unknown
FCTS_1295	1.32346	0.00301861	swi snf-related matrix-associated actin-dependent regulator of chromatin subfamily b member 1
FCTS_1066	1.32339	0.00326626	Unknown
FCTS_8137	1.32334	0.00852987	poly rna mitochondrial
FCTS_6830	1.32322	0.00729398	zinc finger protein 236
FCTS_4999	1.32313	0.00218977	calpain
FCTS_3343	1.32281	0.00669357	Unknown
FCTS_8331	1.32278	0.0020153	methyltransferase-like protein 14 homolog
FCTS_9322	1.32165	0.00768177	rna methyltransferase like 1
FCTS_12412	1.32161	0.00345335	Unknown
FCTS_2005	1.32159	0.00228578	nuclear pore complex protein nup107
FCTS_11302	1.32118	0.0190724	bone morphogenetic protein receptor type-1b
FCTS_2653	1.3208	0.00600868	protein lin-7 homolog b-like
FCTS_21219	1.32045	0.0148683	Unknown
FCTS_2838	1.31988	0.0190889	niemann-pick c1
FCTS_31662	1.31946	0.0439647	Unknown
FCTS_12291	1.31932	0.0129149	upf0586 protein c9orf41 homolog
FCTS_12386	1.3193	0.00739888	probable e3 ubiquitin-protein ligase triml1- partial
FCTS_6956	1.31929	0.00424221	Unknown
FCTS_16959	1.31923	0.0106385	Unknown
FCTS_9909	1.31899	0.00651151	Unknown
FCTS_13128	1.31831	0.0228212	Unknown
FCTS_4034	1.31742	0.00359235	Unknown
FCTS_2695	1.31734	0.0173333	mitochondrial import receptor subunit tom40
FCTS_25456	1.31657	0.0224792	e3 sumo-protein ligase 2
FCTS_19801	1.31638	0.00191573	Unknown
FCTS_8713	1.31582	0.0298725	fgfr1 oncogene partner 2 homolog isoform 2
FCTS_2018	1.3158	0.00788909	Unknown
FCTS_181	1.31555	0.00131	cytochrome p450 2j2-like
FCTS_8669	1.315	0.00739888	mixed-lineage leukemia mll
FCTS_9686	1.31448	0.00242404	u3 small nucleolar rna-associated protein 18 homolog
FCTS_900	1.31417	0.00264674	something about silencing protein 10-like
FCTS_11668	1.31376	0.0037327	Unknown
FCTS_4795	1.31298	0.00147357	Unknown
FCTS_92	1.31228	0.00862784	histone -like
FCTS_16183	1.31215	0.00489672	piwi
FCTS_11504	1.3119	0.00166682	GL23564 [Drosophila persimilis]
FCTS_861	1.31172	0.00395257	Unknown
FCTS_33322	1.31155	0.00202236	Unknown
FCTS_11326	1.31138	0.00380262	anaphase-promoting complex subunit 1
FCTS_26071	1.3112	0.012232	Unknown
FCTS_20097	1.31112	0.00596942	gtah dicdi ame: full=gata zinc finger domain-containing protein 8
FCTS_18166	1.31068	0.0152531	Unknown
FCTS_4416	1.31057	0.0071867	isoform c
FCTS_13455	1.3104	0.00252737	protein phosphatase 1 regulatory subunit 7
FCTS_7291	1.31013	0.0066614	Unknown
FCTS_8929	1.31006	0.0079815	protein ect2-like
FCTS_11535	1.30992	0.00657021	zinc finger partial
FCTS_21539	1.30909	0.00465145	Unknown
FCTS_919	1.30854	0.0463654	signal recognition particle 14 kda protein
FCTS_16424	1.30851	0.00209679	Unknown
FCTS_6740	1.30805	0.0331632	conserved hypothetical protein [Pediculus humanus corporis]
FCTS_3289	1.3079	0.00789894	transaldolase
FCTS_19026	1.30746	0.00418333	Unknown
FCTS_2161	1.30696	0.00451164	Unknown
FCTS_17051	1.30695	0.00416891	Unknown
FCTS_5576	1.30678	0.0171625	zinc finger protein 341
FCTS_14287	1.30636	0.00202358	histone-lysine n-methyltransferase setd1b
FCTS_18327	1.30579	0.00284949	Unknown
FCTS_1394	1.30503	0.00457307	peptidyl-trna hydrolase 2
FCTS_7061	1.30495	0.0107288	run domain beclin-1 interacting and cystein-rich containing
FCTS_7967	1.30467	0.0309089	adenylate cyclase
FCTS_7690	1.30438	0.0111749	orf2-encoded protein
FCTS_1564	1.30408	0.00519294	Unknown
FCTS_7978	1.30368	0.00476509	zinc finger 1
FCTS_31559	1.3036	0.00322787	Unknown
FCTS_7184	1.303	0.00729772	poly -specific ribonuclease parn-like domain-containing protein 1-like
FCTS_10983	1.3025	0.045069	hit zinc finger family protein
FCTS_6238	1.30084	0.00666631	gonadal protein gdl
FCTS_8632	1.29998	0.0274886	ATPase isoform
FCTS_1011	1.29969	0.009247	isoform d
FCTS_9130	1.29931	0.00373376	ddb1- and cul4-associated factor 12-like
FCTS_2025	1.29911	0.00232269	Unknown
FCTS_18942	1.29893	0.00295601	zinc finger protein
FCTS_8344	1.29887	0.00787929	Unknown
FCTS_4684	1.29862	0.0034495	hypothetical protein DAPPUDRAFT 304400 [Daphnia pulex]
FCTS_338	1.29831	0.0278748	Unknown
FCTS_23890	1.29823	0.00295548	Unknown
FCTS_1531	1.29822	0.0180567	fasciclin 2
FCTS_3450	1.2978	0.00218977	deoxyribonuclease tatdn1-like
FCTS_10171	1.2975	0.00124471	coiled-coil domain-containing protein 93-like
FCTS_10346	1.29748	0.00208353	zinc finger ccch domain-containing protein 14-like
FCTS_15011	1.2974	0.00979441	sorting nexin 3
FCTS_28706	1.29726	0.00697547	Unknown
FCTS_654	1.29639	0.0116929	Unknown
FCTS_8708	1.29639	0.00419807	rho-related gtp-binding protein
FCTS_1166	1.29587	0.00696137	kinesin-like protein costa-like
FCTS_16015	1.29534	0.00669318	Unknown
FCTS_287	1.29496	0.017123	zinc finger protein 91-like
FCTS_4655	1.29435	0.00131	upf0468 protein c16orf80 homolog
FCTS_2066	1.29432	0.0303144	adrenodoxin-like mitochondrial-like
FCTS_13849	1.29419	0.0145547	phosphatidylinositol- -trisphosphate 3-phosphatase and dual-specificity protein phosphatase pten
FCTS_4403	1.29409	0.00548968	golgi resident protein gcp60
FCTS_7778	1.29397	0.00724043	huntingtin-interacting protein k-like
FCTS_17731	1.29348	0.00548968	Unknown
FCTS_5799	1.29277	0.0171364	signal peptidase 18 kda subunit
FCTS_9192	1.29262	0.00409179	dual specificity protein phosphatase 10
FCTS_7296	1.29262	0.0016431	Unknown
FCTS_5685	1.29183	0.0144501	Unknown
FCTS_19168	1.29144	0.00700448	extracellular sulfatase sulf-1 homolog
FCTS_8026	1.29108	0.0043253	Unknown
FCTS_351	1.29035	0.0080413	tata box-binding protein 1-like
FCTS_5996	1.29011	0.00348466	Unknown
FCTS_7652	1.28984	0.00201726	ldl receptor protein 1
FCTS_72	1.28906	0.0067435	forkhead box transcription factor subgroup n2
FCTS_23541	1.28877	0.00217133	Unknown
FCTS_14836	1.28871	0.00298977	zinc finger protein
FCTS_31210	1.28849	0.00158511	Unknown
FCTS_7431	1.28823	0.00346398	conserved hypothetical protein [Pediculus humanus corporis]
FCTS_7248	1.28795	0.00377376	mitochondrial cardiolipin hydrolase
FCTS_5402	1.28777	0.0161344	protein timeless homolog
FCTS_8125	1.28768	0.00127371	Unknown
FCTS_6895	1.28747	0.0103828	cdk10 11
FCTS_13076	1.28715	0.00732379	nucleoporin ndc1-like
FCTS_9362	1.28704	0.00914239	cysteine serine-rich nuclear protein 2
FCTS_7049	1.28665	0.0235	PREDICTED: hypothetical protein LOC100740048 [Bombus impatiens]
FCTS_9693	1.28638	0.0025677	u3 small nucleolar rna-associated protein 4
FCTS_5359	1.28637	0.00451164	serine protease
FCTS_2338	1.28636	0.00328224	member ras oncogene family
FCTS_13781	1.28576	0.00141155	chitinase 1 precursor
FCTS_11909	1.28539	0.00436672	Unknown
FCTS_7923	1.28518	0.0113407	pre-mrna-processing factor 17-like
FCTS_3174	1.28444	0.028006	ribonuclease p
FCTS_6230	1.28421	0.00306685	upf0459 protein cg10681-like
FCTS_1380	1.284	0.00138557	fructose- -bisphosphatase
FCTS_5699	1.28379	0.00673601	Unknown
FCTS_13877	1.28327	0.0257589	nuclear pore complex protein nup85
FCTS_16131	1.28278	0.0179171	Unknown
FCTS_9916	1.28209	0.0219985	rcc1 and btb domain-containing protein 2-like
FCTS_5257	1.28176	0.00409179	furin 2
FCTS_13074	1.28155	0.00213139	down syndrome cell adhesion molecule-like protein 1
FCTS_366	1.28108	0.00280185	ubiquitin carboxyl-terminal hydrolase 47
FCTS_7666	1.28087	0.00669628	zinc finger protein
FCTS_4168	1.28034	0.00216014	sugar phosphate exchanger 2-like isoform 2
FCTS_8925	1.28022	0.0042544	tudor domain containing 9
FCTS_4418	1.27996	0.00568292	zinc finger protein 585a
FCTS_10365	1.2798	0.0129256	Unknown
FCTS_22864	1.27934	0.0155979	Unknown
FCTS_8683	1.27926	0.00844041	autophagy-specific gene 6
FCTS_13203	1.2788	0.0050363	probable asparaginyl-trna mitochondrial-like
FCTS_6310	1.27879	0.00162932	lethal neighbour of tid
FCTS_1934	1.27868	0.00427554	Unknown
FCTS_14317	1.27862	0.00397011	Unknown
FCTS_1009	1.27843	0.00206889	Unknown
FCTS_3698	1.27837	0.0169011	squamous cell carcinoma antigen recognized by t-cells 3
FCTS_14533	1.27823	0.00298977	ubiquitin carboxyl-terminal hydrolase 30-like
FCTS_14467	1.27821	0.00662759	Unknown
FCTS_4185	1.27792	0.00839807	methylosome subunit picln-like
FCTS_11524	1.27697	0.0309954	translation factor guf1 mitochondrial-like
FCTS_33040	1.27601	0.00239475	Unknown
FCTS_2945	1.27574	0.0271321	protein bicaudal c-like
FCTS_14598	1.2756	0.00542639	Unknown
FCTS_13993	1.2754	0.00750037	phosphatidylinositol- -bisphosphate 3-kinase catalytic subunit alpha isoform-like
FCTS_34108	1.27401	0.00339689	Unknown
FCTS_1904	1.27361	0.00165397	hypothetical protein BRAFLDRAFT 122979 [Branchiostoma floridae]
FCTS_19253	1.27287	0.00159522	nuclear pore complex protein nup155
FCTS_5369	1.272	0.00205959	Unknown
FCTS_7521	1.27102	0.00217728	telomerase-binding protein est1a-like
FCTS_4526	1.27101	0.00444019	Unknown
FCTS_13796	1.27094	0.00163786	Unknown
FCTS_4381	1.27094	0.0110481	Unknown
FCTS_10940	1.27067	0.0148077	cell division cycle 123 homolog ( cerevisiae)
FCTS_2039	1.27066	0.0217546	Unknown
FCTS_1341	1.26989	0.0188919	protein arginine n-methyltransferase 8
FCTS_1544	1.26971	0.00801648	tho complex subunit 5 homolog
FCTS_11729	1.26878	0.0119112	mitochondrial ribosomal protein isoform a
FCTS_1702	1.26852	0.0438235	wd repeat-containing protein 81
FCTS_5133	1.26833	0.00852987	protein lmbr1l-like
FCTS_7129	1.26824	0.00493426	probable atp-dependent rna helicase ddx49-like
FCTS_2614	1.26813	0.00209679	ribosomal protein s6 kinase
FCTS_3236	1.26765	0.00383937	hypothetical protein BRAFLDRAFT 199094 [Branchiostoma floridae]
FCTS_6143	1.26719	0.00506108	methyltransferase 10 domain containing
FCTS_8464	1.26679	0.0325596	probable atp-dependent rna helicase ythdc2
FCTS_12127	1.26469	0.0185044	Unknown
FCTS_3035	1.2643	0.00336797	twinkle mitochondrial
FCTS_2536	1.26418	0.00383937	conserved hypothetical protein [Culex quinquefasciatus]
FCTS_6612	1.26341	0.00131	Unknown
FCTS_25326	1.2634	0.00993659	n-terminal domain-containing protein
FCTS_13645	1.26338	0.00161021	Unknown
FCTS_6925	1.26315	0.00170832	juvenile hormone-inducible
FCTS_8466	1.26287	0.0228042	alg-1
FCTS_4925	1.26245	0.00124471	tudor domain-containing protein 1
FCTS_5932	1.26202	0.00664967	Unknown
FCTS_18837	1.26182	0.0247706	Unknown
FCTS_11431	1.26147	0.00815814	Unknown
FCTS_11450	1.26022	0.012983	chromatin-remodeling complex atpase chain iswi-like
FCTS_33413	1.26016	0.00315318	Unknown
FCTS_9806	1.2599	0.00260589	Unknown
FCTS_4098	1.25979	0.0431221	condensin complex subunit 1
FCTS_8785	1.25887	0.010111	protein sprint-like
FCTS_9360	1.25873	0.00782009	orthodenticle homeobox 1
FCTS_5703	1.25824	0.00268277	Unknown
FCTS_12858	1.25807	0.00319984	Unknown
FCTS_14306	1.25713	0.0209209	Unknown
FCTS_15047	1.25574	0.00493823	Unknown
FCTS_294	1.25552	0.00396713	gualynate kinase-1
FCTS_9135	1.25548	0.00394912	codanin-1-like isoform 1
FCTS_12729	1.25517	0.0042589	zinc finger protein 91-like
FCTS_7474	1.25435	0.00967191	e3 ubiquitin-protein ligase dtx3l
FCTS_11058	1.25375	0.00309576	dna polymerase alpha catalytic subunit
FCTS_10735	1.25275	0.00395883	Unknown
FCTS_1861	1.252	0.00232269	Unknown
FCTS_25406	1.25195	0.00218977	Unknown
FCTS_2658	1.25119	0.00422333	protein suppressor of forked-like
FCTS_5504	1.25073	0.0102334	anaphase-promoting complex subunit 7-like
FCTS_5035	1.25058	0.00695839	retinol dehydrogenase 11-like
FCTS_2109	1.25057	0.00542639	replication factor c
FCTS_13535	1.25014	0.00238038	Unknown
FCTS_18547	1.24996	0.00328161	inner nuclear membrane protein man1
FCTS_464	1.24962	0.00659893	isoform b
FCTS_10249	1.24918	0.00193894	pdz domain containing guanine nucleotide exchange pdz-
FCTS_7441	1.24824	0.00232269	Unknown
FCTS_14714	1.24807	0.0158804	Unknown
FCTS_20317	1.24777	0.00240883	Unknown
FCTS_16950	1.24772	0.00903426	c12orf41 homolog
FCTS_8815	1.24743	0.00216014	Unknown
FCTS_12903	1.24698	0.00213139	Unknown
FCTS_9757	1.24675	0.0182695	conserved hypothetical protein [Culex quinquefasciatus]
FCTS_9304	1.24673	0.00218977	transforming acidic coiled-coil-containing protein 3
FCTS_22806	1.24654	0.00378605	Unknown
FCTS_12019	1.24652	0.0182222	Unknown
FCTS_1013	1.24597	0.00570479	zinc finger protein 133
FCTS_2071	1.24588	0.00336986	serine threonine kinase 11
FCTS_2526	1.24557	0.00157727	osteopetrosis-associated transmembrane protein 1 precursor
FCTS_9305	1.24538	0.00159522	dna mismatch repair protein mlh1
FCTS_29087	1.24522	0.00232269	Unknown
FCTS_13819	1.24498	0.00739587	Unknown
FCTS_12258	1.24423	0.00494559	Unknown
FCTS_18898	1.2434	0.00193894	rna-binding protein isoform c
FCTS_3958	1.24261	0.0024118	ubiquitin-protein ligase e3c-like
FCTS_4501	1.24244	0.0107366	centriolar coiled-coil protein of 110 kda-like isoform 2
FCTS_10488	1.24133	0.00294061	Unknown
FCTS_31788	1.24117	0.00147419	lim homeobox protein awh
FCTS_9270	1.24103	0.00542639	Unknown
FCTS_4041	1.241	0.0245056	cell cycle associated protein 1
FCTS_13702	1.24079	0.0150184	zinc finger protein 271-like
FCTS_23242	1.23993	0.00438462	Unknown
FCTS_15388	1.23978	0.0415449	dna polymerase theta
FCTS_18456	1.23947	0.00196304	Unknown
FCTS_25714	1.23938	0.00131	paired amphipathic helix protein sin3a
FCTS_18143	1.23894	0.00986562	muts protein homolog 4
FCTS_3673	1.23891	0.00725451	speckle-type poz
FCTS_7555	1.23877	0.0125721	cytoplasmic phosphatidylinositol transfer protein 1-like
FCTS_2225	1.23859	0.00701274	cg9135-pa
FCTS_15516	1.23799	0.00355659	low quality protein: myeloperoxidase- partial
FCTS_17280	1.23697	0.00322787	Unknown
FCTS_14035	1.23658	0.00147419	protein piwi-like
FCTS_2587	1.23652	0.00463501	zinc finger protein 502-like
FCTS_2072	1.23628	0.0116161	Unknown
FCTS_9560	1.2362	0.0214167	Unknown
FCTS_1132	1.23487	0.00302136	rna guanylyltransferase and 5 -phosphatase
FCTS_20308	1.2347	0.00524328	Unknown
FCTS_10378	1.23352	0.00218977	splicing factor u2af 38 kda subunit
FCTS_14681	1.23343	0.00637406	Unknown
FCTS_7813	1.23309	0.00465435	daxx protein
FCTS_11398	1.23277	0.00938584	Unknown
FCTS_9519	1.2325	0.0119966	protein kinase c alpha binding protein
FCTS_31597	1.23204	0.00946513	Unknown
FCTS_13108	1.23196	0.0115135	Unknown
FCTS_12543	1.23136	0.0262969	tyrosine-protein kinase
FCTS_2650	1.23125	0.00847171	copine viii
FCTS_7549	1.23106	0.0106275	piwi
FCTS_7385	1.2308	0.0113622	protein lin-9 homolog
FCTS_1361	1.23018	0.00528764	abnormal x
FCTS_17137	1.23017	0.0136406	trna-dihydrouridine synthase 1-like
FCTS_5154	1.23014	0.0265242	nif3-like protein 1-like
FCTS_8227	1.22999	0.00630824	ribosomal protein s6 kinase delta-1 isoform 1
FCTS_9780	1.22979	0.0242154	Unknown
FCTS_501	1.22965	0.029797	mitochondrial carrier homolog 2-like
FCTS_13778	1.22953	0.00807665	poc1 centriolar protein homolog a
FCTS_2592	1.22902	0.00367058	mitochondrial cytochrome c1
FCTS_2934	1.22794	0.00308976	serine threonine protein
FCTS_27233	1.22768	0.00410414	Unknown
FCTS_21533	1.22763	0.0102298	mediator of rna polymerase ii transcription subunit 11
FCTS_7242	1.22761	0.0122984	translation initiation factor
FCTS_14341	1.22748	0.00216014	suppressor of ty 3 homolog
FCTS_12524	1.22725	0.0418185	sugar transporter
FCTS_14063	1.22688	0.00208933	atp-dependent rna and dna helicase
FCTS_55	1.22649	0.00669318	mitochondrial ribosomal protein s10
FCTS_6691	1.22597	0.00323816	Unknown
FCTS_7325	1.22588	0.0153997	trna-dihydrouridine synthase 2-like
FCTS_9905	1.22527	0.0415449	Unknown
FCTS_13396	1.22502	0.00698061	peroxiredoxin
FCTS_11615	1.22471	0.00378225	protein phosphatase 2c
FCTS_9188	1.22436	0.00745341	Unknown
FCTS_899	1.22416	0.00848456	Unknown
FCTS_5513	1.22404	0.012998	Unknown
FCTS_17197	1.22387	0.00522668	Unknown
FCTS_26070	1.22351	0.00191037	Unknown
FCTS_11751	1.22319	0.0220349	phosphatidyl inositol n-acetylglucosaminyl transferase subunit c
FCTS_384	1.22268	0.00372257	splicing factor 3a subunit 3
FCTS_208	1.22257	0.012271	leucine rich repeat protein
FCTS_8844	1.2224	0.0137891	Unknown
FCTS_5681	1.22229	0.022271	Unknown
FCTS_11118	1.22218	0.0037327	Unknown
FCTS_190	1.22187	0.0111533	e3 ubiquitin-protein ligase march2
FCTS_19035	1.2218	0.00131	Unknown
FCTS_22481	1.22083	0.0166464	Unknown
FCTS_6403	1.22072	0.0474851	isoform h
FCTS_28851	1.22062	0.00217133	transcription initiation factor tfiid subunit 3
FCTS_18814	1.2203	0.0130401	Unknown
FCTS_20145	1.22029	0.0187634	Unknown
FCTS_27962	1.21942	0.00342736	Unknown
FCTS_20263	1.21905	0.00879889	Unknown
FCTS_17484	1.21903	0.0212044	Unknown
FCTS_5205	1.21879	0.0313915	rcc1-related guanine nucleotide exchange factor
FCTS_6881	1.21875	0.00762123	mitogen activated protein kinase kinase kinase isoform cra a
FCTS_4420	1.21874	0.0385836	synthesis of cytochrome c oxidase
FCTS_11574	1.21848	0.0214562	Unknown
FCTS_2829	1.21785	0.00920093	paired amphipathic helix protein sin3a
FCTS_21640	1.21622	0.00326042	Unknown
FCTS_19469	1.2162	0.00253731	Unknown
FCTS_26751	1.21559	0.0318689	Unknown
FCTS_4975	1.21555	0.0225863	transcriptional crp fnr family
FCTS_23730	1.21512	0.00443229	PREDICTED: similar to predicted protein [Tribolium castaneum]
FCTS_15380	1.21508	0.00790042	Unknown
FCTS_10697	1.21466	0.00219724	probable trnahis guanylyltransferase
FCTS_3245	1.21461	0.00299931	transcription initiation factor tfiid subunit 5
FCTS_12702	1.21456	0.00852995	phosphatidate photoreceptor-specific-like
FCTS_10721	1.21403	0.0286125	protein fam57a-like
FCTS_9457	1.21402	0.00877276	Unknown
FCTS_14634	1.21355	0.00893652	Unknown
FCTS_3559	1.21292	0.00322865	dnaj homolog subfamily b member 11-like
FCTS_13666	1.21274	0.00440702	integrator complex subunit 7
FCTS_8717	1.21255	0.00463421	dynactin subunit 4
FCTS_8594	1.21181	0.032465	fast kinase domain-containing protein 5
FCTS_6346	1.21111	0.00675763	ccaat enhancer-binding protein beta
FCTS_17518	1.21071	0.00193894	y+l amino acid transporter 2-like
FCTS_3232	1.21069	0.00915069	transmembrane protein 229b-like
FCTS_13222	1.21039	0.00416183	Unknown
FCTS_441	1.21038	0.00330371	peptidyl-prolyl cis-trans isomerase-like 4-like
FCTS_17421	1.21033	0.00232269	Unknown
FCTS_15099	1.21003	0.00564331	hyaluronan mediated motility receptor
FCTS_10040	1.2098	0.00209679	Unknown
FCTS_29417	1.20962	0.00806801	Unknown
FCTS_15281	1.2096	0.0236759	dna replication licensing factor mcm5
FCTS_7304	1.20951	0.00210452	Unknown
FCTS_13119	1.2091	0.023445	Unknown
FCTS_11662	1.20888	0.00347063	hypothetical protein PIIN 05598 [Piriformospora indica DSM 11827]
FCTS_13408	1.20867	0.00454114	Unknown
FCTS_19512	1.20848	0.00415663	Unknown
FCTS_14938	1.20828	0.0112012	dendritic cell protein
FCTS_33278	1.20818	0.00186763	Unknown
FCTS_9343	1.20762	0.00244137	Unknown
FCTS_17709	1.20742	0.00127993	eukaryotic translation initiation factor 4 3
FCTS_1794	1.20727	0.0114413	g protein pathway suppressor 1
FCTS_27040	1.20701	0.00322432	nuclear receptor nhr-48
FCTS_17879	1.20668	0.00209679	pecanex-like protein 1
FCTS_21504	1.20664	0.00358618	atp-dependent rna
FCTS_5563	1.20626	0.0424806	zinc finger protein 691-like
FCTS_4296	1.20621	0.00994381	PREDICTED: hypothetical protein LOC100574986 [Acyrthosiphon pisum]
FCTS_5467	1.20551	0.00587399	abhydrolase domain-containing protein 11-like
FCTS_14684	1.20511	0.00147419	Unknown
FCTS_2718	1.20445	0.00576248	ccr4-associated factor
FCTS_11890	1.20383	0.00453454	thap domain containing 7
FCTS_9870	1.20341	0.00562022	Unknown
FCTS_6046	1.20246	0.00438333	tubulin polyglutamylase ttll4-like
FCTS_5988	1.20224	0.00297324	atp-binding sub-family c (cftr mrp) member isoform cra a
FCTS_2478	1.20219	0.00288941	transmembrane protein 214-like
FCTS_11871	1.20197	0.0134005	Unknown
FCTS_13486	1.20187	0.0260202	ecdysone inducible protein 75
FCTS_30019	1.20178	0.00269276	Unknown
FCTS_2387	1.20175	0.00180681	ww domain-containing oxidoreductase
FCTS_11056	1.20142	0.00298977	protein
FCTS_27869	1.20135	0.0016431	Unknown
FCTS_5347	1.20111	0.0393077	low quality protein: calpain-7-like
FCTS_1473	1.20085	0.0164659	glutathione s-transferase omega-1-like
FCTS_8010	1.19968	0.00147419	opa32 drome ame: full= opa3-like protein cg13603
FCTS_22587	1.19927	0.00190783	dna mismatch repair protein msh2-like
FCTS_1449	1.19856	0.0145227	protein fam109a
FCTS_6278	1.19852	0.00124471	probable atp-dependent rna helicase ddx10
FCTS_30147	1.19847	0.00414257	Unknown
FCTS_3222	1.19846	0.0257589	spry domain-containing socs box protein 1-like
FCTS_6951	1.19813	0.0229125	zinc finger protein 658-like
FCTS_4411	1.19739	0.00326626	Unknown
FCTS_10655	1.19724	0.00224596	geranylgeranyl transferase type-1 subunit beta-like
FCTS_2584	1.19696	0.00778901	Unknown
FCTS_5907	1.19646	0.00907957	Unknown
FCTS_5429	1.19621	0.00902825	ribosomal rna-processing protein 7 homolog a-like
FCTS_9932	1.19572	0.00514104	protein arginine n-methyltransferase
FCTS_4929	1.19555	0.00396748	zinc finger hit domain-containing protein 3-like
FCTS_17912	1.19513	0.00380854	Unknown
FCTS_30156	1.19504	0.0061378	Unknown
FCTS_3423	1.19475	0.00180681	Unknown
FCTS_8838	1.19455	0.00345183	exostosin-2
FCTS_15321	1.19453	0.0110459	mitochondrial chaperone bcs1
FCTS_1637	1.194	0.00173039	esterase fe4
FCTS_10222	1.19387	0.0249772	Unknown
FCTS_8351	1.19383	0.00700598	chromatin assembly factor 1 subunit a
FCTS_31071	1.19354	0.00127993	Unknown
FCTS_10286	1.19314	0.00201234	Unknown
FCTS_14107	1.19231	0.0144527	zinc finger protein
FCTS_146	1.19213	0.00780396	niemann-pick c1
FCTS_15421	1.19204	0.00543763	Unknown
FCTS_9735	1.19183	0.00164336	Unknown
FCTS_22354	1.19181	0.0215517	Unknown
FCTS_9260	1.1918	0.0288505	alkaline phosphatase
FCTS_5944	1.19144	0.00421257	Unknown
FCTS_33270	1.19112	0.00239475	Unknown
FCTS_8055	1.19104	0.0371109	syntaxin 1a
FCTS_1229	1.19098	0.00518882	transmembrane protein 111-like
FCTS_18195	1.19067	0.00646506	Unknown
FCTS_29466	1.19058	0.0168729	hypothetical protein SINV 15685 [Solenopsis invicta]
FCTS_4383	1.19052	0.00138557	Unknown
FCTS_5713	1.19035	0.00307163	Unknown
FCTS_2988	1.18998	0.0129366	coenzyme q-binding protein coq10 homolog mitochondrial-like
FCTS_14413	1.18998	0.0134829	bud13 homolog isoform 1
FCTS_27041	1.18956	0.0157304	Unknown
FCTS_17200	1.18918	0.00341589	Unknown
FCTS_3903	1.18893	0.00682079	rab32
FCTS_13454	1.18839	0.0159332	zinc finger protein
FCTS_18003	1.18826	0.00328228	zinc transporter 5
FCTS_5383	1.18816	0.00298004	u2 small nuclear ribonucleoprotein auxiliary factor 35 kda subunit-related protein 2-like
FCTS_15973	1.1877	0.00210814	Unknown
FCTS_13793	1.18741	0.0150541	Unknown
FCTS_6674	1.1865	0.00159522	serine arginine regulated nuclear matrix
FCTS_12577	1.18629	0.0451635	Unknown
FCTS_7662	1.18619	0.00298977	derlin-2
FCTS_27489	1.18618	0.00232269	cg32604
FCTS_30882	1.18612	0.00127993	Unknown
FCTS_26186	1.18542	0.00178897	brca1 interacting protein c-terminal helicase 1
FCTS_3001	1.18496	0.0154919	probable rna-binding protein eif1ad-like
FCTS_4036	1.18482	0.00798071	tho complex subunit 5 homolog
FCTS_9969	1.18427	0.00239041	Unknown
FCTS_7962	1.1834	0.0150569	peptidyl-prolyl cis-trans isomerase
FCTS_31292	1.18322	0.00217133	Unknown
FCTS_22668	1.18301	0.00138557	solute carrier family member 11
FCTS_10259	1.18226	0.0183396	Unknown
FCTS_7442	1.18223	0.00159522	Unknown
FCTS_10580	1.18215	0.00231895	Unknown
FCTS_5945	1.18117	0.0170255	cchc-type zinc finger protein cg3800-like
FCTS_14550	1.17992	0.00159522	Unknown
FCTS_10976	1.17886	0.00470395	Unknown
FCTS_4295	1.17878	0.0036099	origin recognition complex subunit 5
FCTS_21268	1.17877	0.00162932	zinc finger protein
FCTS_2884	1.17821	0.0036099	Unknown
FCTS_3812	1.17807	0.00184499	u3 small nucleolar rna-associated protein 15 homolog
FCTS_28646	1.17789	0.00196174	Unknown
FCTS_4623	1.17776	0.00709349	protein polybromo-1
FCTS_6416	1.1776	0.00209679	upf0668 protein c10orf76 homolog
FCTS_33134	1.17746	0.00138557	Unknown
FCTS_444	1.17699	0.00709159	conserved hypothetical protein [Pediculus humanus corporis]
FCTS_12140	1.17683	0.00466921	Unknown
FCTS_11903	1.17682	0.00459027	fact complex subunit ssrp1
FCTS_3804	1.17671	0.0128807	major facilitator superfamily domain-containing protein 1
FCTS_16128	1.17641	0.00322787	btb poz domain-containing protein
FCTS_27295	1.17632	0.00138557	nucleolar protein 6 alpha isoform
FCTS_4376	1.17604	0.0213104	acyl- thioesterase 9
FCTS_12756	1.17445	0.0129149	nuclear receptor corepressor 2
FCTS_17440	1.17431	0.0186911	Unknown
FCTS_30311	1.1742	0.0147993	transcriptional repressor ctcf
FCTS_13027	1.17407	0.00320256	transcription factor rfx3-like
FCTS_31593	1.17393	0.00768195	pleckstrin homology domain-containing family m member 1-like
FCTS_5957	1.17333	0.00404858	Unknown
FCTS_8827	1.17313	0.0422216	glutamate decarboxylase
FCTS_133	1.17309	0.0226087	ankyrin repeat and zinc finger domain-containing protein 1-like
FCTS_11324	1.17289	0.00283914	Unknown
FCTS_6071	1.17274	0.0194303	transcription elongation factor spt4
FCTS_25308	1.17271	0.00153113	swi snf-related matrix-associated actin-dependent regulator of chromatin subfamily b member 1
FCTS_8565	1.17269	0.00186763	Unknown
FCTS_13856	1.17253	0.00240883	bumetanide-sensitive sodium- -chloride cotransporter-like
FCTS_23697	1.17208	0.00159184	serine threonine-protein kinase 40
FCTS_3380	1.17182	0.00646506	fizzy-related protein homolog
FCTS_11506	1.17121	0.00270533	Unknown
FCTS_2506	1.1711	0.00216014	Unknown
FCTS_9746	1.17094	0.00320256	Unknown
FCTS_29126	1.17081	0.00654188	Unknown
FCTS_2677	1.17079	0.00235509	ruvb-like 2-like
FCTS_3461	1.17072	0.0223809	Unknown
FCTS_3870	1.17071	0.00341589	nad-dependent deacetylase sirtuin-5
FCTS_8682	1.17051	0.00839638	Unknown
FCTS_3235	1.17045	0.0252796	Unknown
FCTS_1578	1.16959	0.0135969	nuclear pore complex protein nup98-nup96
FCTS_31255	1.16893	0.00131	armadillo repeat-containing protein 8-like
FCTS_27631	1.16889	0.0018379	Unknown
FCTS_1222	1.16881	0.00159522	ccr4-not transcription complex subunit 2
FCTS_6584	1.16861	0.00676041	atp-dependent rna helicase
FCTS_29203	1.16853	0.00466765	Unknown
FCTS_18081	1.16832	0.00232269	Unknown
FCTS_7515	1.16816	0.00193894	zinc finger protein 454
FCTS_9036	1.16775	0.00124471	nuclear pore complex
FCTS_30032	1.16766	0.00197807	Unknown
FCTS_1303	1.16673	0.00414257	46 kda fk506-binding nuclear protein
FCTS_7848	1.16669	0.00127993	phospholipid scramblase 1
FCTS_34808	1.16661	0.0032065	toll-interacting protein
FCTS_3744	1.16639	0.0107191	Unknown
FCTS_30498	1.16576	0.00205959	Unknown
FCTS_8197	1.1657	0.00138557	Unknown
FCTS_8153	1.16556	0.00405498	tyrosine-protein kinase pr2
FCTS_14077	1.1654	0.00435902	protein kinase family protein with pasta domain
FCTS_414	1.16527	0.00131	a chain structural studies of nucleoside analog and feedback inhibitor binding to drosophila melanogaster multisubstrate deoxyribonucleoside kinase
FCTS_35110	1.16518	0.0137439	Unknown
FCTS_21777	1.1651	0.00348828	Unknown
FCTS_16786	1.16499	0.0202497	Unknown
FCTS_3269	1.16492	0.00410712	60s ribosome subunit biogenesis protein nip7 homolog
FCTS_2008	1.16434	0.012934	Unknown
FCTS_17359	1.16428	0.00457307	n-acetylglucosaminyl-phosphatidylinositol de-n-acetylase-like
FCTS_2255	1.16379	0.00353697	u6 snrna-associated sm-like protein lsm8
FCTS_8598	1.16358	0.00202358	Unknown
FCTS_9987	1.16304	0.00576857	conserved hypothetical protein [Pediculus humanus corporis]
FCTS_14784	1.16303	0.00932574	phosphatidylinositol- -bisphosphate 3-kinase catalytic subunit alpha isoform-like
FCTS_18380	1.16282	0.00192243	Unknown
FCTS_2854	1.16184	0.0120222	hypothetical kda protein in chromosome
FCTS_8802	1.16119	0.00216014	Unknown
FCTS_20921	1.16113	0.00464844	Unknown
FCTS_27053	1.1608	0.00562886	zinc finger protein partial
FCTS_5916	1.16074	0.00298004	metallophosphoesterase 1-like
FCTS_5961	1.16013	0.00410842	AGAP003463-PA [Anopheles gambiae str. PEST]
FCTS_1369	1.16003	0.00884221	non-structural maintenance of chromosomes element 1 homolog
FCTS_13230	1.15958	0.0070249	Unknown
FCTS_3094	1.15955	0.00268277	isoform b
FCTS_1952	1.15955	0.00138557	wd repeat-containing protein 55 homolog
FCTS_5254	1.15941	0.00652571	major facilitator superfamily domain-containing protein 9
FCTS_10736	1.15939	0.0327705	Unknown
FCTS_2093	1.15919	0.00352099	Unknown
FCTS_16876	1.15877	0.00159522	Unknown
FCTS_12327	1.15816	0.00413869	lysine-specific histone demethylase 1a-like
FCTS_14920	1.15802	0.00583218	Unknown
FCTS_9395	1.15769	0.0189711	transposase-like protein
FCTS_6972	1.15754	0.0131865	importin-13-like
FCTS_1667	1.15603	0.00314643	sugar transporter
FCTS_4784	1.15585	0.0113336	Unknown
FCTS_18705	1.15581	0.0081461	zinc finger protein 43 isoform 1
FCTS_809	1.15576	0.0266136	Unknown
FCTS_13368	1.15572	0.00193894	integrator complex subunit 11-like
FCTS_3326	1.15569	0.0059382	Unknown
FCTS_11201	1.15551	0.00169366	Unknown
FCTS_20961	1.15506	0.02697	Unknown
FCTS_30525	1.15493	0.00366753	Unknown
FCTS_2774	1.15477	0.00586773	sodium-bile acid cotransporter
FCTS_20301	1.15417	0.00192468	Unknown
FCTS_13436	1.15416	0.00367624	zinc finger protein 567
FCTS_2966	1.15383	0.00994381	solute carrier family 25 member 40
FCTS_12626	1.15382	0.00428125	Unknown
FCTS_7198	1.1535	0.0083062	lanc-like protein 2
FCTS_12648	1.15342	0.00357334	Unknown
FCTS_1570	1.15337	0.00230825	activator of 90 kda heat shock protein atpase homolog 1-like
FCTS_10404	1.15301	0.0325596	Unknown
FCTS_6064	1.15287	0.00882851	Unknown
FCTS_3704	1.15283	0.0225089	hypothetical protein ATCV1 z410R [Acanthocystis turfacea Chlorella virus 1]
FCTS_27802	1.15248	0.0151665	Unknown
FCTS_26748	1.1524	0.0406337	Unknown
FCTS_7357	1.15223	0.00313859	translation initiation factor
FCTS_18647	1.1521	0.0292072	protein polybromo-1
FCTS_15134	1.15194	0.00197807	rab-like protein 3-like
FCTS_33265	1.15192	0.00131	chromodomain y-like protein
FCTS_4070	1.15092	0.0174451	actin-related protein 2 3 complex subunit 1a
FCTS_15816	1.15075	0.00739888	Unknown
FCTS_15590	1.15056	0.00471122	conserved hypothetical protein [Paracoccidioides brasiliensis Pb01]
FCTS_4726	1.14991	0.0157396	ribonuclease p protein component 4
FCTS_13662	1.14974	0.00323328	Unknown
FCTS_10856	1.14944	0.0197358	Unknown
FCTS_4053	1.14887	0.00492461	Unknown
FCTS_4610	1.14848	0.0342886	zinc finger protein 236
FCTS_14015	1.14841	0.00183585	Unknown
FCTS_11638	1.14767	0.00348466	vasa
FCTS_15371	1.14743	0.00216014	Unknown
FCTS_8926	1.14715	0.0234806	26s proteasome non-atpase regulatory subunit 10
FCTS_15128	1.14675	0.00159522	Unknown
FCTS_34178	1.14666	0.00250765	Unknown
FCTS_10217	1.14656	0.0155979	casein kinase
FCTS_8894	1.14639	0.0103106	scavenger mrna-decapping enzyme
FCTS_19022	1.14596	0.0257128	Unknown
FCTS_26435	1.14574	0.0245145	gpi ethanolamine phosphate transferase
FCTS_6050	1.14516	0.00435437	Unknown
FCTS_3495	1.1449	0.00240001	tetratricopeptide repeat protein 27-like
FCTS_3901	1.14445	0.00177024	Unknown
FCTS_14980	1.14401	0.00187852	trna-dihydrouridine synthase 4-like
FCTS_7282	1.14394	0.0103869	Unknown
FCTS_27970	1.14374	0.00535179	Unknown
FCTS_11696	1.14302	0.00968946	Unknown
FCTS_20943	1.14299	0.0223441	Unknown
FCTS_7027	1.1425	0.00658042	novel zinc finger protein
FCTS_218	1.14243	0.0140621	palmitoyltransferase zdhhc3-like
FCTS_10878	1.14226	0.0490572	type and c3hc4type zinc fingercontaining protein 1
FCTS_20538	1.1421	0.00363595	Unknown
FCTS_735	1.14182	0.0171846	selenophosphate synthetase
FCTS_3590	1.14143	0.00237956	udp-galactose translocator
FCTS_10649	1.1412	0.00761244	protein jade-3
FCTS_409	1.14109	0.00752203	peroxisomal membrane protein 11b
FCTS_5507	1.14075	0.00273739	Unknown
FCTS_3364	1.13996	0.0067435	vacuolar protein sorting-associated protein 28 homolog
FCTS_274	1.13953	0.00627417	Unknown
FCTS_22622	1.13953	0.00651151	endonuclease reverse transcriptase
FCTS_7902	1.13893	0.00427296	unhealthy ribosome biogenesis protein 2 homolog
FCTS_4334	1.13871	0.00362958	acid phosphatase-1
FCTS_6672	1.13862	0.00209679	hsp70 subfamily b suppressor 1-like
FCTS_3176	1.13826	0.00573837	swi snf-related matrix-associated actin-dependent regulator chromatin subfamily e member 1
FCTS_3504	1.13781	0.00408549	pre-mrna cleavage complex 2 protein pcf11
FCTS_15685	1.13775	0.00162932	Unknown
FCTS_1071	1.13769	0.0226885	dna polymerase theta
FCTS_34927	1.13732	0.00994316	Unknown
FCTS_16961	1.13685	0.00348183	probable atp-dependent rna helicase ddx28-like
FCTS_927	1.13682	0.0174451	sin3a-associated protein sap130
FCTS_26239	1.13644	0.0101007	Unknown
[truncated: 3,092 more rows]

## Sheet: Table S1_2
Table S1_2 : All significantly down-regulated genes in Folosomia candida in response to EC50 of HMF in soil
GeneName	Log2 Fold change	adj p value	Molecular function
FCTS_5232	-4.27332	0.0218598	isoform b
FCTS_20975	-4.13569	0.00497516	predicted protein [Nematostella vectensis]
FCTS_19570	-4.06782	0.0157815	Unknown
FCTS_4646	-3.75249	0.00689383	Unknown
FCTS_14398	-3.74781	0.0102191	o-glycosyl hydrolase family 30 protein
FCTS_6641	-3.69856	0.0353537	dbh-like 1
FCTS_7572	-3.62933	0.0101558	cre-nas-4 protein
FCTS_5338	-3.57489	0.0139704	glycosyl hydrolase family 71
FCTS_13518	-3.56184	0.0136066	endo-b- -glucanase
FCTS_23709	-3.49192	0.0194758	Unknown
FCTS_9141	-3.47448	0.014829	serine protease family
FCTS_28480	-3.41253	0.0319018	Unknown
FCTS_12845	-3.38935	0.027676	chitin-binding protein
FCTS_16587	-3.38642	0.0435255	Unknown
FCTS_6040	-3.35529	0.0111491	endo-beta- -mannanase
FCTS_2819	-3.2709	0.0133268	carbohydrate binding family 6
FCTS_13515	-3.26401	0.00719756	bacterial leucyl aminopeptidase
FCTS_13659	-3.23077	0.00401608	ubiquitin conjugating
FCTS_14282	-3.16015	0.0070396	2og-fe oxygenase
FCTS_10000	-3.12339	0.0122938	chitin-binding protein
FCTS_7428	-3.11994	0.00388816	tyramine oxidase
FCTS_755	-3.10753	0.00673601	Unknown
FCTS_348	-3.06622	0.00897464	glutaminase
FCTS_13487	-3.05749	0.00200168	esterase lipase
FCTS_4105	-3.04914	0.0131509	Unknown
FCTS_34551	-3.02219	0.0413958	Unknown
FCTS_11825	-2.98203	0.0487494	chitin binding domain 3 protein
FCTS_13248	-2.94559	0.00694141	fad fmn-containing dehydrogenase
FCTS_9377	-2.93313	0.0143939	cytochrome family subfamily polypeptide 4
FCTS_9382	-2.92735	0.0233269	endo-b- -glucanase
FCTS_14358	-2.91942	0.00656122	alg-1
FCTS_9413	-2.87829	0.0373257	lipase
FCTS_3951	-2.83079	0.0190012	exo-beta- -glucanase
FCTS_26349	-2.81584	0.0259039	endo- -beta-glucanase
FCTS_4692	-2.80094	0.0452851	chitinase partial
FCTS_939	-2.80019	0.00438462	glutathione s-
FCTS_9124	-2.72	0.0354342	endoglucanase- -beta-glucanase
FCTS_7745	-2.7195	0.0357293	alpha-l- tissue
FCTS_12950	-2.7049	0.00131	Unknown
FCTS_5069	-2.68727	0.0103663	Unknown
FCTS_26354	-2.66833	0.00124471	Unknown
FCTS_15166	-2.66728	0.00218977	Unknown
FCTS_13256	-2.65632	0.00598167	Unknown
FCTS_14594	-2.63849	0.00131	Unknown
FCTS_16828	-2.63053	0.0269699	cre-nas-15 protein
FCTS_10191	-2.62888	0.00312401	Unknown
FCTS_14388	-2.62487	0.0143852	Unknown
FCTS_21245	-2.58197	0.0124739	chaperone protein
FCTS_19586	-2.57919	0.043932	endo-b- -glucanase
FCTS_21728	-2.57426	0.00329502	nfx1-type zinc finger-containing protein 1-like
FCTS_3076	-2.55603	0.00261347	Unknown
FCTS_19573	-2.54325	0.00235556	argonaute protein group
FCTS_2287	-2.5276	0.034437	gram negative bacteria binding protein 2
FCTS_35003	-2.52031	0.00635912	Unknown
FCTS_2461	-2.51917	0.0120023	1-alkyl-2-acetylglycerophosphocholine esterase
FCTS_9492	-2.51398	0.00315182	retinol dehydrogenase 11-like
FCTS_28761	-2.51098	0.00541747	protein translocase subunit seca
FCTS_29255	-2.50746	0.00716049	Unknown
FCTS_10802	-2.50195	0.00721333	Unknown
FCTS_14911	-2.49269	0.00238038	Unknown
FCTS_31581	-2.48975	0.0152115	Unknown
FCTS_20557	-2.48644	0.00159522	peptidase s8 and s53 subtilisin kexin sedolisin
FCTS_7667	-2.4855	0.00568058	cell wall hydrolase
FCTS_8115	-2.46019	0.0285679	Unknown
FCTS_21216	-2.4579	0.00306685	Unknown
FCTS_23028	-2.44499	0.00869679	Unknown
FCTS_4212	-2.44078	0.00329537	von willebrand factor type a domain protein
FCTS_10126	-2.4379	0.00237623	aldehyde oxidase
FCTS_23689	-2.43334	0.0288827	Unknown
FCTS_2605	-2.41187	0.0282352	phenazine biosynthesis-like domain-containing protein isoform a
FCTS_31310	-2.40577	0.00193894	Unknown
FCTS_21641	-2.38682	0.0396367	Unknown
FCTS_3639	-2.38098	0.00282554	glucose dehydrogenase
FCTS_2499	-2.37791	0.00931878	lipolytic protein g-d-s-l family
FCTS_9323	-2.36678	0.00409404	Unknown
FCTS_28765	-2.36138	0.0196005	lipase
FCTS_31856	-2.35572	0.00566687	Unknown
FCTS_2556	-2.35197	0.0134743	alpha-n-arabinofuranosidase
FCTS_2386	-2.35142	0.0243234	pancreatic triacylglycerol lipase-like
FCTS_25358	-2.34045	0.0259804	Unknown
FCTS_825	-2.33961	0.045457	endochitinase a
FCTS_740	-2.33473	0.00964727	cg33099 cg33099-pa
FCTS_22269	-2.3292	0.00800346	hypothetical protein DAPPUDRAFT 313938 [Daphnia pulex]
FCTS_16680	-2.32649	0.00374202	lipase
FCTS_3696	-2.32156	0.00179791	molybdopterin cofactor sulfurase
FCTS_11034	-2.31643	0.00380262	aldehyde oxidase
FCTS_14369	-2.31314	0.00618966	Unknown
FCTS_26346	-2.31277	0.00527526	chaperone protein
FCTS_1330	-2.30766	0.0103847	apolipoprotein d
FCTS_4944	-2.30255	0.00563528	Unknown
FCTS_2866	-2.30189	0.00230046	myosin light chain
FCTS_28678	-2.30002	0.00644397	helicase conserved c-terminal domain containing protein
FCTS_5905	-2.29996	0.00900843	Unknown
FCTS_17780	-2.2983	0.00782894	hypothetical protein DAPPUDRAFT 226094 [Daphnia pulex]
FCTS_9504	-2.28858	0.009247	arrestin domain-containing protein 1
FCTS_39	-2.28482	0.0397089	Unknown
FCTS_5438	-2.28079	0.00878133	sec14-like protein 2-like
FCTS_711	-2.27759	0.00180914	nitrilase cyanide hydratase and apolipoprotein n-acyltransferase
FCTS_1910	-2.27034	0.0094447	Unknown
FCTS_6096	-2.26984	0.0138687	endoglycoceramidase isoform 2
FCTS_26830	-2.26171	0.00570412	predicted protein [Naegleria gruberi]
FCTS_5772	-2.25744	0.00855308	chorion peroxidase-like
FCTS_4689	-2.23151	0.0191119	lipase
FCTS_13017	-2.22589	0.00131	Unknown
FCTS_19619	-2.22538	0.0195206	chymotrypsin-like proteinase 5a precursor
FCTS_191	-2.21516	0.00157861	globin 1
FCTS_15276	-2.21516	0.0423853	Unknown
FCTS_14263	-2.20783	0.00373141	peptidoglycan recognition protein 3 short class
FCTS_114	-2.2029	0.00367221	glycoside hydrolase family 16
FCTS_6148	-2.18839	0.00380475	glutathione s-
FCTS_2497	-2.17732	0.0382141	alanine--glyoxylate aminotransferase 2-like
FCTS_7530	-2.17577	0.00806801	kiaa1404 protein
FCTS_10979	-2.17312	0.0304961	Unknown
FCTS_2204	-2.17254	0.00219041	venom serine carboxypeptidase-like
FCTS_22041	-2.16884	0.00408287	Unknown
FCTS_12179	-2.16406	0.00929902	Unknown
FCTS_11932	-2.15743	0.0158804	PREDICTED: hypothetical protein [Hydra magnipapillata]
FCTS_4019	-2.15355	0.00937149	Unknown
FCTS_29504	-2.1481	0.00315102	Unknown
FCTS_2546	-2.14471	0.00131	sterol desaturase
FCTS_34333	-2.14001	0.0116009	Unknown
FCTS_16596	-2.13718	0.00348579	membrane protein
FCTS_6938	-2.13283	0.0114914	Unknown
FCTS_3957	-2.13189	0.00389418	Unknown
FCTS_19196	-2.12983	0.0250072	Unknown
FCTS_8599	-2.12911	0.00404858	Unknown
FCTS_1644	-2.12176	0.0118005	Unknown
FCTS_1050	-2.11688	0.00202767	cg4382 cg4382-pa
FCTS_23330	-2.11601	0.00298977	Unknown
FCTS_15048	-2.11113	0.00646506	l-sorbosone dehydrogenase
FCTS_13069	-2.11011	0.00141155	Unknown
FCTS_12709	-2.10776	0.00352099	kettin protein
FCTS_2396	-2.10652	0.00242404	Unknown
FCTS_23352	-2.1011	0.00235509	protein translocase subunit seca
FCTS_10401	-2.09381	0.00619235	Unknown
FCTS_7823	-2.09263	0.047467	Unknown
FCTS_982	-2.09062	0.0109742	Unknown
FCTS_6239	-2.08486	0.0084087	apolipoprotein d-like
FCTS_12790	-2.08109	0.00205986	vitellogenic carboxypeptidase
FCTS_20432	-2.07865	0.0363943	beta-galactosidase-1-like protein 2-like
FCTS_2216	-2.07781	0.00673795	stretchin- isoform d
FCTS_25852	-2.07399	0.0397462	Unknown
FCTS_7295	-2.07277	0.00793466	Unknown
FCTS_23910	-2.07083	0.00414257	titin
FCTS_5028	-2.06783	0.00289276	iron transport multicopper oxidase fet3 precursor
FCTS_30340	-2.06339	0.00675796	Unknown
FCTS_18543	-2.05685	0.00150821	Unknown
FCTS_11154	-2.05175	0.00207275	titin
FCTS_11405	-2.0517	0.00300258	transient receptor potential channel pyrexia
FCTS_1655	-2.05131	0.00575386	uncoordinated family member (unc-89)
FCTS_9852	-2.03696	0.00218977	cre-pxl-1 protein
FCTS_11213	-2.03644	0.0423661	sphingomyelin phosphodiesterase isoform 1
FCTS_17224	-2.03622	0.00768177	cytochrome p450 aromatase
FCTS_3186	-2.03341	0.00496372	plasminogen activator spa
FCTS_12745	-2.03244	0.0229231	exo-beta- -glucanase exg0
FCTS_10774	-2.03063	0.00138557	Unknown
FCTS_7330	-2.02689	0.00131	small gtp-binding protein
FCTS_15565	-2.02588	0.00194232	helicase conserved c-terminal domain containing protein
FCTS_6160	-2.02557	0.00654188	golgi-associated plant pathogenesis-related protein 1
FCTS_11223	-2.02425	0.00576428	Unknown
FCTS_34962	-2.02259	0.00453454	chymotrypsin-like proteinase 5a precursor
FCTS_1270	-2.02221	0.00501897	beta-glucuronidase-like
FCTS_19311	-2.0217	0.00414257	animal haem peroxidase family protein
FCTS_10224	-2.01792	0.0370168	polyhydroxybutyrate depolymerase
FCTS_4950	-2.01729	0.00124471	peroxisomal acyl-coenzyme a oxidase 3
FCTS_6158	-2.0157	0.0041695	Unknown
FCTS_4289	-2.01302	0.00650091	pancreatic triacylglycerol lipase
FCTS_5648	-2.01214	0.00433688	Unknown
FCTS_29310	-2.00635	0.00372606	low quality protein: titin-like
FCTS_1862	-2.00445	0.00437001	3-ketoacyl- mitochondrial
FCTS_5421	-2.00361	0.023895	glycoside hydrolase family 16
FCTS_22498	-2.0027	0.00337383	Unknown
FCTS_7123	-2	0.0448062	Unknown
FCTS_24559	-1.99986	0.0030638	Unknown
FCTS_17170	-1.99575	0.0423476	Unknown
FCTS_1556	-1.99257	0.00347032	Unknown
FCTS_2427	-1.99232	0.0421374	projectin short variant
FCTS_7874	-1.99039	0.00423547	low quality protein: twitchin
FCTS_12187	-1.98564	0.0215448	Unknown
FCTS_8515	-1.98152	0.0168026	carboxylesterase
FCTS_4454	-1.98064	0.00408869	vitamin d 25-hydroxylase-like
FCTS_4980	-1.98033	0.00621875	Unknown
FCTS_11685	-1.97967	0.00752186	Unknown
FCTS_23948	-1.97897	0.0310973	Unknown
FCTS_4990	-1.97325	0.00262402	alpha isoform a
FCTS_24294	-1.97051	0.00247531	Unknown
FCTS_8247	-1.96884	0.0428539	hypothetical protein DAPPUDRAFT 308669 [Daphnia pulex]
FCTS_12298	-1.96497	0.0248501	Unknown
FCTS_3123	-1.9646	0.00540509	peritrophic membrane chitin binding protein
FCTS_386	-1.96283	0.0129114	glutathione s-transferase-like
FCTS_12597	-1.95957	0.00367221	geoa gene product
FCTS_33529	-1.95866	0.00757439	Unknown
FCTS_22189	-1.95776	0.00209679	Unknown
FCTS_1305	-1.95469	0.0285381	Unknown
FCTS_28639	-1.95245	0.0157389	PREDICTED: hypothetical protein [Hydra magnipapillata]
FCTS_1150	-1.94695	0.0081597	glycosyl hydrolase
FCTS_9375	-1.94546	0.00661734	serine threonine-protein kinase ctr1-like
FCTS_21752	-1.94542	0.01019	Unknown
FCTS_12462	-1.94476	0.00415027	isoform n
FCTS_13758	-1.94373	0.00508775	dna polymerase eta
FCTS_8097	-1.92696	0.0266136	glycosyl hydrolase
FCTS_2111	-1.92584	0.00251959	endo alpha- polygalactosaminidase
FCTS_2431	-1.92557	0.0059382	cytochrome family subfamily polypeptide 2
FCTS_34789	-1.92397	0.00322787	elav-like protein 2-like
FCTS_16862	-1.92279	0.00902825	isoform a
FCTS_16913	-1.92002	0.00124471	glutathione s-transferase-like
FCTS_26121	-1.91957	0.0158317	insect intestinal mucin 3
FCTS_3296	-1.91841	0.00637406	oxidoreductase htatip2
FCTS_19486	-1.9145	0.00558344	Unknown
FCTS_6193	-1.91206	0.0112177	Unknown
FCTS_9491	-1.90722	0.00978228	retinol dehydrogenase 11-like
FCTS_11323	-1.90695	0.00695466	glutathione s-transferase mu
FCTS_28243	-1.906	0.00124471	Unknown
FCTS_8054	-1.90542	0.00587664	b chain first-sphere and second-sphere electrostatic effects in the active site of a class mu glutathione transferase
FCTS_2175	-1.90386	0.00432143	titin
FCTS_5199	-1.90364	0.0171856	type-like protein
FCTS_8733	-1.89767	0.0182029	Unknown
FCTS_7985	-1.89626	0.00274785	egf-like domain-containing protein
FCTS_2728	-1.89614	0.0333397	maltase- intestinal
FCTS_3898	-1.89525	0.00213139	ws dgat mgat
FCTS_13369	-1.89398	0.034023	cre-nas-1 protein
FCTS_8391	-1.89306	0.0340626	carbohydrate binding family 6
FCTS_1670	-1.89303	0.03738	Unknown
FCTS_24535	-1.89013	0.0127437	low quality protein: titin-like
FCTS_4096	-1.88852	0.0150491	Unknown
FCTS_7826	-1.88677	0.0406317	eukaryotic translation initiation factor theta subunit
FCTS_15971	-1.88494	0.00503965	sec14-like protein 2-like
FCTS_3355	-1.884	0.00288944	Unknown
FCTS_14346	-1.88363	0.0144586	Unknown
FCTS_474	-1.88219	0.00568058	novex-3 (titin isoform)
FCTS_10593	-1.88149	0.00228818	Unknown
FCTS_9303	-1.87776	0.00127993	abc subfamily abch
FCTS_4259	-1.87417	0.00157294	geranylgeranyl pyrophosphate synthase
FCTS_18860	-1.87269	0.00269276	aldehyde oxidase
FCTS_20235	-1.8725	0.0418953	Unknown
FCTS_5084	-1.87156	0.00702931	aldo-keto reductase
FCTS_16767	-1.87078	0.0480888	Unknown
FCTS_8151	-1.87071	0.00145067	mfs transporter
FCTS_4395	-1.86602	0.00942721	l-serine ammonia-lyase
FCTS_4506	-1.86267	0.00770433	Unknown
FCTS_8181	-1.86026	0.00872575	Unknown
FCTS_533	-1.85231	0.0350543	golgi-associated plant pathogenesis-related protein 1
FCTS_24481	-1.84778	0.0170261	muscle myosin heavy chain
FCTS_12643	-1.84282	0.00197168	beaten path ia
FCTS_4735	-1.8413	0.013424	Unknown
FCTS_6781	-1.84002	0.00303339	venom serine carboxypeptidase-like
FCTS_7068	-1.83842	0.00539392	phospholipase group iif
FCTS_2075	-1.83718	0.0423853	possible beta-xylosidase
FCTS_12682	-1.83612	0.00465145	Unknown
FCTS_27268	-1.82715	0.00336439	tail fiber domain protein
FCTS_16119	-1.82616	0.00452508	protein phosphatase 1 binding
FCTS_8111	-1.82387	0.00860347	Unknown
FCTS_3849	-1.816	0.0383365	carboxylesterase
FCTS_2353	-1.81349	0.0136373	Unknown
FCTS_5637	-1.81259	0.0466686	glycosyl hydrolase family 71
FCTS_2213	-1.81193	0.00575269	novel protein vertebrate heat-responsive protein 12 ( zgc:101025)
FCTS_14603	-1.81117	0.00320256	Unknown
FCTS_7254	-1.81008	0.0328011	juvenile hormone-inducible
FCTS_27782	-1.8091	0.00141155	Unknown
FCTS_26	-1.80685	0.0149831	aldo-keto reductase
FCTS_21800	-1.8021	0.0209861	Unknown
FCTS_4100	-1.80094	0.0325596	unnamed protein product [Trichodesmium erythraeum IMS101]
FCTS_11828	-1.79836	0.0186921	protein
FCTS_24338	-1.79714	0.0117382	Unknown
FCTS_20892	-1.79675	0.00202236	Unknown
FCTS_18459	-1.79581	0.011689	venom serine carboxypeptidase-like
FCTS_18722	-1.79253	0.00288345	Unknown
FCTS_983	-1.78997	0.0413761	Unknown
FCTS_30210	-1.7879	0.00250765	Unknown
FCTS_2627	-1.78783	0.00739888	carboxylesterase
FCTS_16458	-1.78697	0.00315182	uncharacterized iron-regulated protein
FCTS_8595	-1.78657	0.0243063	sec14-like protein 2-like
FCTS_1136	-1.78641	0.0149035	myosin heavy chain
FCTS_25012	-1.78574	0.0142862	structural maintenance of chromosomes flexible hinge domain-containing protein 1
FCTS_15492	-1.78435	0.00445352	Unknown
FCTS_34805	-1.7824	0.00354674	Unknown
FCTS_9061	-1.77921	0.0126076	3-ketosteroid-9-alpha-hydroxylase oxygenase subunit-like
FCTS_5363	-1.77896	0.00444019	Unknown
FCTS_12566	-1.77541	0.00345977	Unknown
FCTS_3860	-1.7737	0.0235511	protein containing f5 8 type c domain
FCTS_4863	-1.77369	0.00160871	Unknown
FCTS_16032	-1.77052	0.00646506	Unknown
FCTS_2748	-1.76974	0.0065266	Unknown
FCTS_12241	-1.76831	0.00178897	sodium potassium-dependent atpase beta-2 subunit
FCTS_7194	-1.76305	0.0397213	cytochrome p450 3a
FCTS_28194	-1.76125	0.00124471	exonuclease 1-like
FCTS_20540	-1.75854	0.00768085	nfx1-type zinc finger-containing protein 1
FCTS_6007	-1.75827	0.00604862	supernatant protein factor
FCTS_33017	-1.75472	0.00328228	Unknown
FCTS_24571	-1.75199	0.00915543	low quality protein: twitchin
FCTS_16815	-1.75126	0.00632642	Unknown
FCTS_2550	-1.74765	0.00298977	predicted protein [Laccaria bicolor S238N-H82]
FCTS_1990	-1.74702	0.00782751	isoform a
FCTS_11036	-1.74699	0.00528764	isoform g
FCTS_9588	-1.74641	0.00205986	trimethyllysine epsilon
FCTS_7757	-1.74604	0.00124471	Unknown
FCTS_12120	-1.74564	0.0202653	PREDICTED: hypothetical protein [Hydra magnipapillata]
FCTS_29091	-1.7441	0.00209679	ryanodine receptor homologue
FCTS_9104	-1.74308	0.00920093	lipase 3
FCTS_11944	-1.74228	0.00131	aaa atpase containing von willebrand factor type a
FCTS_4487	-1.74223	0.00218977	glutathione s-transferase mu 3
FCTS_8454	-1.73625	0.00191037	solute carrier family 23 member 2
FCTS_17367	-1.73235	0.00902825	muscle-specific protein isoform b
FCTS_1754	-1.72882	0.022339	Unknown
FCTS_854	-1.72829	0.00228578	malate dehydrogenase
FCTS_8532	-1.72672	0.00242414	myosin heavy chain
FCTS_21433	-1.72662	0.00208669	annexin x
FCTS_27734	-1.72637	0.00637877	Unknown
FCTS_6407	-1.72394	0.0242154	gcn5-related n-acetyltransferase
FCTS_19125	-1.72284	0.00124471	hypothetical protein MAA 08196 [Metarhizium anisopliae ARSEF 23]
FCTS_15239	-1.71825	0.00798776	Unknown
FCTS_6498	-1.7173	0.00380866	Unknown
FCTS_4144	-1.71617	0.00438128	filamin-a-interacting protein 1-like
FCTS_34559	-1.71452	0.0226999	Unknown
FCTS_28106	-1.71421	0.00449801	Unknown
FCTS_20671	-1.70863	0.0255369	Unknown
FCTS_2565	-1.70763	0.0108977	Unknown
FCTS_1735	-1.70667	0.0139228	Unknown
FCTS_9404	-1.70641	0.0404166	antennal esterase cxe20
FCTS_8755	-1.70583	0.0081461	alpha-tocopherol transfer
FCTS_13050	-1.703	0.00875149	Unknown
FCTS_27622	-1.70127	0.00239475	Unknown
FCTS_9516	-1.70072	0.0209605	Unknown
FCTS_10193	-1.69933	0.0211836	Unknown
FCTS_30353	-1.69835	0.00589363	Unknown
FCTS_25008	-1.69762	0.00164336	Unknown
FCTS_18966	-1.69607	0.0183702	Unknown
FCTS_22901	-1.69606	0.0267656	Unknown
FCTS_14807	-1.69581	0.0113209	na+ k+ atpase alpha2 subunit
FCTS_12550	-1.6957	0.0281198	low quality protein: twitchin-like
FCTS_8278	-1.69558	0.00138557	hypothetical protein AOL s00054g825 [Arthrobotrys oligospora ATCC 24927]
FCTS_2364	-1.6954	0.00209679	slc25a35 protein
FCTS_20332	-1.69511	0.0100553	Unknown
FCTS_31407	-1.69485	0.00127993	Unknown
FCTS_563	-1.69468	0.0080715	myosin heavy chain
FCTS_6996	-1.69368	0.00580752	cullin 3
FCTS_13495	-1.69246	0.00590011	pancreatic lipase-related protein 1-like
FCTS_10477	-1.69143	0.00775718	lps-induced tnf-alpha factor
FCTS_20376	-1.68972	0.0197013	beta adrenergic receptor
FCTS_13231	-1.68781	0.00225036	Unknown
FCTS_17738	-1.68412	0.00387864	dna polymerase eta
FCTS_19406	-1.6841	0.0197844	Unknown
FCTS_21762	-1.68142	0.00942051	adp-ribosylation factor-like 6 interacting protein 2
FCTS_7470	-1.68069	0.0117512	abc subfamily abch
FCTS_5676	-1.68051	0.00141109	a disintegrin and metalloproteinase with thrombospondin motifs 1
FCTS_11462	-1.68007	0.00289276	3-ketosteroid-9-alpha-hydroxylase oxygenase subunit-like
FCTS_21854	-1.67912	0.00137367	hypothetical protein MAA 08196 [Metarhizium anisopliae ARSEF 23]
FCTS_26351	-1.67767	0.0344982	Unknown
FCTS_5481	-1.67675	0.00124471	ribosomal protein p0
FCTS_24538	-1.67527	0.00393811	l 01289 long form
FCTS_8087	-1.67321	0.0158591	Unknown
FCTS_26741	-1.67282	0.00348091	projectin short variant
FCTS_16415	-1.67153	0.00412365	Unknown
FCTS_14009	-1.67082	0.0289467	Unknown
FCTS_14420	-1.67032	0.0024439	Unknown
FCTS_81	-1.67015	0.0118841	structural maintenance of chromosomes flexible hinge domain-containing protein 1
FCTS_5295	-1.66924	0.0036297	Unknown
FCTS_25789	-1.66585	0.0363504	cytochrome p450 4v2-like
FCTS_3089	-1.66392	0.00243986	PREDICTED: hypothetical protein, partial [Hydra magnipapillata]
FCTS_1155	-1.66379	0.015409	trypsin
FCTS_8305	-1.66361	0.00787929	Unknown
FCTS_16081	-1.66142	0.00216014	Unknown
FCTS_7802	-1.66064	0.012232	Unknown
FCTS_29733	-1.65906	0.00427015	Unknown
FCTS_8581	-1.65598	0.00899104	Unknown
FCTS_16577	-1.65511	0.0426857	fibronectin i domain-containing protein
FCTS_19505	-1.6544	0.00767718	maltase- intestinal
FCTS_8775	-1.65434	0.00625209	sugar transporter
FCTS_14671	-1.65384	0.0135651	Unknown
FCTS_8793	-1.65377	0.0266631	luciferin-regenerating enzyme
FCTS_9015	-1.65313	0.012873	glucose dehydrogenase
FCTS_16328	-1.65191	0.00948029	myosin heavy nonmuscle or smooth muscle
FCTS_3507	-1.65121	0.0150532	serine protease easter
FCTS_3194	-1.64919	0.0073097	muscle-specific protein isoform b
FCTS_4094	-1.64884	0.00180914	lim domain protein
FCTS_7313	-1.64677	0.0347662	isoform b
FCTS_17387	-1.64469	0.0160585	Unknown
FCTS_11441	-1.64362	0.00124471	organic cation transporter protein
FCTS_6954	-1.64271	0.00686271	fibulin 1
FCTS_27640	-1.64261	0.00453225	Unknown
FCTS_3149	-1.6425	0.0145115	Unknown
FCTS_32039	-1.6421	0.00904321	Unknown
FCTS_12696	-1.64173	0.00808862	protein
FCTS_21747	-1.63878	0.0482506	putative exopeptidase [Bacillus sp. m3-13]
FCTS_15736	-1.63854	0.00399583	carboxylesterase
FCTS_1200	-1.63751	0.00205986	tyrosine aminotransferase
FCTS_21521	-1.63681	0.00333154	extracellular solute-binding protein family 1
FCTS_4613	-1.63463	0.00131	bm8 interacting protein 2d-4
FCTS_13671	-1.63211	0.0206065	sec14-like protein 2-like
FCTS_9022	-1.63041	0.0136992	Unknown
FCTS_6224	-1.63038	0.00748308	alcohol dehydrogenase
FCTS_21572	-1.6285	0.00994316	Unknown
FCTS_29773	-1.62798	0.0431	Unknown
FCTS_16459	-1.62676	0.00899104	Unknown
FCTS_4058	-1.62641	0.00900843	Unknown
FCTS_25273	-1.62623	0.00440198	Unknown
FCTS_8458	-1.62478	0.00336266	arginase- mitochondrial-like
FCTS_26348	-1.62455	0.00228578	Unknown
FCTS_3868	-1.62372	0.0134743	zgc:55605 protein
FCTS_1646	-1.62072	0.00239475	melanization protease isoform a
FCTS_10861	-1.61885	0.00506211	Unknown
FCTS_16333	-1.61861	0.0138213	Unknown
FCTS_2764	-1.61721	0.0120278	beta-lactamase domain containing family member (lact-7)-like
FCTS_909	-1.61665	0.00217133	fucose mutarotase-like
FCTS_7580	-1.61652	0.0035666	Unknown
FCTS_21493	-1.61576	0.0266618	lipase precursor
FCTS_33747	-1.61336	0.00636416	Unknown
FCTS_8763	-1.61333	0.00692511	hypothetical protein MYCTH 2294970 [Myceliophthora thermophila ATCC 42464]
FCTS_7808	-1.61318	0.00468015	Unknown
FCTS_28378	-1.61171	0.00584853	Unknown
FCTS_9447	-1.61114	0.00207736	histidine ammonia-lyase protein
FCTS_11047	-1.61094	0.00695839	glycosyl hydrolase
FCTS_3742	-1.61053	0.0145441	Unknown
FCTS_1445	-1.60972	0.0215671	lactase-phlorizin hydrolase
FCTS_5305	-1.60918	0.0466158	novel protein hatching enzymes
FCTS_25704	-1.60582	0.00391124	muscle-specific protein isoform b
FCTS_12940	-1.60578	0.0330211	low quality protein: twitchin-like
FCTS_4276	-1.60523	0.0418213	trypsin 7
FCTS_28625	-1.60229	0.00432409	muscle m-line assembly protein unc-89
FCTS_23703	-1.60154	0.00124471	Unknown
FCTS_5820	-1.60071	0.00864279	protein translocase subunit seca
FCTS_2756	-1.60025	0.0171531	regenerating islet-derived 1
FCTS_3316	-1.59978	0.0134732	Unknown
FCTS_8800	-1.59955	0.00239475	flavin-binding monooxygenase-like protein
FCTS_3416	-1.59902	0.00873649	loc799646 protein
FCTS_3634	-1.59888	0.00486221	cg33099 cg33099-pa
FCTS_8981	-1.59839	0.0120278	loc494811 protein
FCTS_14410	-1.59689	0.011689	cg15628 cg15628-pa
FCTS_29354	-1.59641	0.00342163	Unknown
FCTS_3271	-1.59605	0.0198946	Unknown
FCTS_7764	-1.59505	0.0296417	golgi-associated plant pathogenesis-related protein 1
FCTS_5890	-1.59442	0.0166966	zinc finger cchc domain-containing protein 24-like
FCTS_24292	-1.5941	0.0393523	Unknown
FCTS_4389	-1.59285	0.00158511	dehydrogenase reductase sdr family member 7-like
FCTS_10450	-1.5921	0.00766738	myosin heavy chain variant b
FCTS_18199	-1.58995	0.0291344	bent
FCTS_4427	-1.58955	0.00403898	cytochrome p450 mitochondrial-like
FCTS_221	-1.58803	0.0046596	pyridoxine-5 -phosphate oxidase-like
FCTS_14663	-1.58791	0.013601	Unknown
FCTS_6784	-1.58659	0.00419966	Unknown
FCTS_4734	-1.58562	0.00402649	gst-n-metaxin-like protein
FCTS_954	-1.58542	0.00942051	adenosine deaminase
FCTS_8545	-1.58453	0.0040603	dna polymerase iv
FCTS_10347	-1.58291	0.0348268	kettin protein
FCTS_668	-1.58222	0.00989137	Unknown
FCTS_12829	-1.58222	0.01892	serine protease family
FCTS_10715	-1.58147	0.00953489	nfx1-type zinc finger-containing protein 1-like
FCTS_1753	-1.58093	0.00660226	acid phosphatase-1
FCTS_9493	-1.58089	0.0030638	heparan-alpha-glucosaminide n-acetyltransferase-like
FCTS_9642	-1.57983	0.0101421	4-coumarate- ligase
FCTS_34392	-1.57973	0.0342209	Unknown
FCTS_3310	-1.57941	0.00836379	haloacid dehalogenase-like hydrolase domain containing 1a
FCTS_10168	-1.57741	0.0142526	Unknown
FCTS_6921	-1.57527	0.00923792	alcohol dehydrogenase
FCTS_8117	-1.5742	0.00651038	24-dehydrocholesterol reductase
FCTS_8294	-1.57417	0.00162932	muscle m-line assembly protein unc-89
FCTS_11427	-1.5728	0.00218977	l-ascorbate oxidase
FCTS_12804	-1.57236	0.0116207	PREDICTED: similar to CG32019-PA [Tribolium castaneum]
FCTS_13902	-1.56735	0.012873	glucosyl glucuronosyl transferases
FCTS_110	-1.56716	0.00339289	Unknown
FCTS_4824	-1.56689	0.00234496	restin (cytoplasmic linker protein-170) (clip-170)
FCTS_11950	-1.56593	0.0295823	Unknown
FCTS_15915	-1.56445	0.00193894	Unknown
FCTS_1186	-1.56386	0.0449006	peroxisomal n -acetyl-spermine spermidine oxidase-like
FCTS_13019	-1.56331	0.0407843	Unknown
FCTS_10206	-1.56276	0.00466285	Unknown
FCTS_34168	-1.56168	0.0193949	Unknown
FCTS_9196	-1.56149	0.0292854	o-glycosyl hydrolase family 30 protein
FCTS_17869	-1.55949	0.00193894	Unknown
FCTS_7503	-1.55923	0.0196005	sodium solute symporter
FCTS_34313	-1.55905	0.0338907	Unknown
FCTS_32881	-1.55776	0.00498998	Unknown
FCTS_18438	-1.55412	0.0348679	cytochrome p450 2j2-like
FCTS_32653	-1.55348	0.0149201	Unknown
FCTS_11607	-1.55058	0.00891496	Unknown
FCTS_8260	-1.55055	0.00124471	calponin transgelin
FCTS_30601	-1.55053	0.00233146	isoform c
FCTS_11230	-1.54974	0.00131	cytochrome p450 2p2
FCTS_10112	-1.54937	0.00318818	Unknown
FCTS_7166	-1.54937	0.0276544	Unknown
FCTS_9800	-1.54815	0.00142018	adamts family member (adt-2)
FCTS_16836	-1.54738	0.00745341	Unknown
FCTS_1312	-1.54715	0.0189145	Unknown
FCTS_28123	-1.54484	0.0178648	Unknown
FCTS_6187	-1.54433	0.00162932	facilitated trehalose transporter tret1-like
FCTS_11304	-1.54417	0.00882851	structural constituent of
FCTS_30835	-1.54225	0.00745341	Unknown
FCTS_33380	-1.54195	0.0304066	Unknown
FCTS_1441	-1.54164	0.0195751	vitellogenin 2
FCTS_16643	-1.54145	0.00362148	a disintegrin and metalloproteinase with thrombospondin motifs 3-like
FCTS_22490	-1.54052	0.0243063	isoform a
FCTS_19051	-1.54032	0.00740435	cyclopentanone -monooxygenase
FCTS_2690	-1.5387	0.00346435	ornithine decarboxylase
FCTS_22171	-1.53821	0.00166516	Unknown
FCTS_12847	-1.53791	0.0227662	conserved plasmodium protein
FCTS_8233	-1.53765	0.00239475	24-dehydrocholesterol reductase
FCTS_29340	-1.53737	0.0110045	protein
FCTS_1365	-1.53498	0.00380262	Unknown
FCTS_10750	-1.53446	0.0079349	achain crystal structure of vegfr2 in complex with a - trimethoxy aniline containing pyrimidine
FCTS_3410	-1.53374	0.00224596	insect intestinal mucin iim14
FCTS_19584	-1.5337	0.00369298	Unknown
FCTS_5442	-1.53358	0.0169011	muscle m-line assembly protein unc-89
FCTS_1332	-1.53292	0.0081622	conserved hypothetical protein [Rickettsiella grylli]
FCTS_5542	-1.53104	0.00124471	Unknown
FCTS_17867	-1.53097	0.044243	mgc86386 protein
FCTS_29145	-1.53053	0.0205292	Unknown
FCTS_17154	-1.529	0.00905221	Unknown
FCTS_22426	-1.52744	0.00232269	oxidoreductase
FCTS_19192	-1.52741	0.0143816	Unknown
FCTS_7935	-1.52677	0.00196304	folate transporter 1
FCTS_6219	-1.52625	0.0424183	Unknown
FCTS_33284	-1.52309	0.00456585	beta- -galactosyltransferase 1-like
FCTS_5108	-1.52258	0.0297837	ejaculatory bulb-specific protein 3-like
FCTS_14733	-1.52118	0.0224561	glucose dehydrogenase
FCTS_1541	-1.52089	0.00158511	annexin a13
FCTS_17641	-1.51992	0.0220575	Unknown
FCTS_2246	-1.51901	0.033194	PREDICTED: hypothetical protein [Hydra magnipapillata]
FCTS_19972	-1.51795	0.00905221	Unknown
FCTS_24402	-1.51616	0.0299797	serine protease family
FCTS_27131	-1.51472	0.00582513	Unknown
FCTS_11111	-1.50972	0.0120278	Unknown
FCTS_7189	-1.50902	0.0197101	kettin protein
FCTS_411	-1.50817	0.00757656	Unknown
FCTS_26750	-1.50663	0.0158371	Unknown
FCTS_16044	-1.50443	0.0175762	muscle myosin heavy chain
FCTS_2749	-1.50419	0.00197168	serine protease 70 precursor
FCTS_7289	-1.50411	0.00159522	neutral ceramidase
FCTS_9981	-1.50368	0.00206727	Unknown
FCTS_15273	-1.50246	0.00268277	Unknown
FCTS_3885	-1.50237	0.00414257	l-xylulose reductase
FCTS_25227	-1.50128	0.0202857	dehydrogenase reductase sdr family member 7-like
FCTS_3044	-1.49967	0.00186763	organic cation transporter
FCTS_9526	-1.49872	0.00180914	liver tocopherol-associated protein
FCTS_26896	-1.49806	0.00232269	Unknown
FCTS_5342	-1.49707	0.0383085	Unknown
FCTS_28830	-1.49654	0.00906685	Unknown
FCTS_3765	-1.49475	0.0167326	Unknown
FCTS_33455	-1.49427	0.00218977	Unknown
FCTS_17103	-1.49275	0.0311736	Unknown
FCTS_12475	-1.49272	0.00768687	gamma-glutamyltranspeptidase 1-like
FCTS_19270	-1.49233	0.00374202	Unknown
FCTS_11171	-1.49152	0.012201	isoform g
FCTS_7132	-1.4894	0.0200197	Unknown
FCTS_15340	-1.4893	0.0268583	Unknown
FCTS_1297	-1.48813	0.00138557	cytochrome p450
FCTS_2339	-1.4878	0.00239475	malate dehydrogenase
FCTS_29508	-1.48659	0.00347599	Unknown
FCTS_7807	-1.48603	0.0103232	amp-dependent synthetase and ligase
FCTS_15861	-1.48538	0.0147067	isoform g
FCTS_9764	-1.48492	0.00418333	Unknown
FCTS_6513	-1.48485	0.00562803	lipase 3
FCTS_16293	-1.48435	0.00243062	Unknown
FCTS_6357	-1.4836	0.00131	Unknown
FCTS_19138	-1.48251	0.0210867	Unknown
FCTS_15661	-1.48115	0.00378305	Unknown
FCTS_951	-1.48057	0.00841731	chitooligosaccharidolytic beta-n-acetylglucosaminidase
FCTS_8974	-1.47994	0.00970314	Unknown
FCTS_5231	-1.47978	0.0348188	alpha- sarcomeric
FCTS_10939	-1.47878	0.0434788	pancreatic alpha-amylase-like
FCTS_392	-1.4778	0.00661414	udp glucuronosyltransferase 2 polypeptide b15
FCTS_21699	-1.47712	0.0197013	Unknown
FCTS_11055	-1.47701	0.00625209	Unknown
FCTS_6268	-1.47651	0.00711458	Unknown
FCTS_454	-1.47616	0.00298977	lethal essential for life l2efl
FCTS_28441	-1.47559	0.0127535	Unknown
FCTS_4340	-1.47195	0.0126433	duf1237 domain protein
FCTS_21535	-1.47176	0.00782157	arginase
FCTS_34478	-1.47172	0.00700166	Unknown
FCTS_18475	-1.47086	0.00748915	Unknown
FCTS_19878	-1.47041	0.0229125	isoform g
FCTS_524	-1.47032	0.0187161	Unknown
FCTS_4300	-1.46882	0.00202026	Unknown
FCTS_14126	-1.46873	0.0226497	Unknown
FCTS_10146	-1.46783	0.00193894	Unknown
FCTS_10646	-1.46589	0.00404681	isoform b
FCTS_13318	-1.46566	0.00978296	Unknown
FCTS_24634	-1.46462	0.0291517	neuronal calcium sensor 2
FCTS_7356	-1.46381	0.0247492	af393501 1antennal binding protein 8
FCTS_30062	-1.46315	0.018575	Unknown
FCTS_18561	-1.46299	0.00300778	Unknown
FCTS_8967	-1.46234	0.00450729	Unknown
FCTS_27929	-1.46085	0.012096	Unknown
FCTS_2171	-1.4607	0.0225216	transmembrane 6 superfamily member 1
FCTS_10557	-1.46023	0.00596191	Unknown
FCTS_34774	-1.45966	0.00724302	isoform e
FCTS_4553	-1.45929	0.00351732	salivary gland
FCTS_5164	-1.45722	0.03107	PREDICTED: hypothetical protein LOC100678450 [Nasonia vitripennis]
FCTS_24045	-1.45615	0.0176299	Unknown
FCTS_17923	-1.45597	0.0206492	sodium-dependent multivitamin transporter
FCTS_17216	-1.45562	0.0260757	Unknown
FCTS_13981	-1.45538	0.011364	type domain containing 7a
FCTS_1398	-1.45383	0.00338499	like protein
FCTS_16983	-1.45335	0.0191449	sucrase- intestinal
FCTS_6503	-1.45326	0.00632255	defense protein 3-like
FCTS_5145	-1.45257	0.00637877	amino acids transporter
FCTS_1561	-1.45213	0.0109289	aaa atpase domain containing protein
FCTS_20388	-1.4521	0.00471496	Unknown
FCTS_8792	-1.45199	0.0247706	myosin heavy chain
FCTS_17997	-1.45171	0.00729615	Unknown
FCTS_18982	-1.45082	0.0324199	Unknown
FCTS_11985	-1.45075	0.00159522	cytochrome p450
FCTS_1059	-1.45006	0.0432652	troponin invertebrate
FCTS_26106	-1.44994	0.0352951	fatty acid amide hydrolase
FCTS_2906	-1.44885	0.00502678	hypothetical protein BRAFLDRAFT 143777 [Branchiostoma floridae]
FCTS_264	-1.44847	0.0226999	fumarylacetoacetate hydrolase domain-containing protein 2a-like
FCTS_8386	-1.44766	0.0120994	n- isoform a
FCTS_10183	-1.44737	0.00191573	cystathionine gamma-lyase-like
FCTS_5142	-1.44632	0.00328466	bestrophin isoform a
FCTS_64	-1.44612	0.00193894	dehydrogenase reductase sdr family member 4
FCTS_3565	-1.44508	0.019125	Unknown
FCTS_24694	-1.44392	0.0250072	Unknown
FCTS_14809	-1.44353	0.0310428	Unknown
FCTS_29961	-1.4435	0.00956105	Unknown
FCTS_8292	-1.44339	0.0170791	maltase- intestinal-like
FCTS_14507	-1.44246	0.0496235	Unknown
FCTS_17638	-1.44191	0.00860949	Unknown
FCTS_19781	-1.44149	0.0133142	Unknown
FCTS_7479	-1.44135	0.00339689	Unknown
FCTS_23511	-1.44042	0.0369726	Unknown
FCTS_1018	-1.43783	0.0254296	Unknown
FCTS_6138	-1.43737	0.00563528	Unknown
FCTS_21415	-1.43733	0.00852399	24-dehydrocholesterol reductase
FCTS_14154	-1.43728	0.0166552	Unknown
FCTS_2744	-1.4368	0.00199915	inosine-uridine preferring nucleoside hydrolase-like
FCTS_5790	-1.43649	0.00725317	lactase-phlorizin hydrolase
FCTS_3597	-1.43639	0.00798705	protein isoform
FCTS_5686	-1.43619	0.00147419	venom carboxylesterase-6-like
FCTS_15208	-1.43598	0.00724043	Unknown
FCTS_25350	-1.43506	0.0311736	homeobox protein hox-
FCTS_23618	-1.4343	0.044798	fatty acid synthase-like
FCTS_871	-1.43319	0.00525347	low-density lipoprotein receptor-related protein 2
FCTS_25125	-1.43312	0.00214266	Unknown
FCTS_13944	-1.43294	0.0184062	low quality protein: twitchin
FCTS_31683	-1.43275	0.0266225	Unknown
FCTS_8414	-1.43142	0.0155876	PREDICTED: hypothetical protein LOC100160882 [Acyrthosiphon pisum]
FCTS_5588	-1.43132	0.00962969	Unknown
FCTS_18871	-1.43058	0.0367851	krueppel-like factor partial
FCTS_14228	-1.4301	0.0148411	von willebrand factor a domain-containing protein 5a
FCTS_20174	-1.42988	0.0210421	Unknown
FCTS_7487	-1.4295	0.0341516	kynurenine 3-monooxygenase
FCTS_3181	-1.42936	0.00233146	isoform g
FCTS_7847	-1.42907	0.0165835	myosin light chain
FCTS_7225	-1.42879	0.0281198	chitin binding protein
FCTS_6766	-1.42873	0.0241106	Unknown
FCTS_6934	-1.42852	0.00147357	Unknown
FCTS_11114	-1.42824	0.00187838	calcium-dependent secretion activator
FCTS_8139	-1.42773	0.0159615	glutamate
FCTS_143	-1.42711	0.00904124	Unknown
FCTS_26561	-1.42695	0.0103977	Unknown
FCTS_23186	-1.42633	0.00993659	Unknown
FCTS_7444	-1.42543	0.00180681	Unknown
FCTS_26923	-1.42454	0.0364761	geranylgeranyl pyrophosphate synthase-like
FCTS_3693	-1.42453	0.0215671	1-acyl-sn-glycerol-3-phosphate acyltransferase alpha-like
FCTS_4806	-1.4238	0.0052183	cystathionine beta-lyase
FCTS_13149	-1.42321	0.0368335	muscle-specific protein 300 cg33715-pd
FCTS_30590	-1.42292	0.00202026	Unknown
FCTS_4459	-1.42272	0.0030638	organic cation transporter
FCTS_4545	-1.42172	0.00138557	serine protease inhibitor 3 4-like
FCTS_328	-1.42159	0.0103847	venom carboxylesterase-6-like
FCTS_12497	-1.42112	0.0353694	peritrophic matrix protein 5-b
FCTS_10518	-1.42096	0.00595076	Unknown
FCTS_1983	-1.4205	0.00669033	gcn5-related n-acetyltransferase
FCTS_14855	-1.42032	0.0430076	neutral ceramidase-like
FCTS_17065	-1.41927	0.00410842	Unknown
FCTS_6117	-1.41895	0.00933997	conserved hypothetical protein [Pediculus humanus corporis]
FCTS_29977	-1.41879	0.0134666	Unknown
FCTS_8488	-1.41807	0.00974427	Unknown
FCTS_4485	-1.41648	0.0414034	solute carrier family 43 member 3-like
FCTS_1475	-1.41451	0.0033268	Unknown
FCTS_17707	-1.41441	0.00291194	Unknown
FCTS_14177	-1.41437	0.00131	Unknown
FCTS_9856	-1.4143	0.0128398	tropomyosin
FCTS_17157	-1.41427	0.0172902	Unknown
FCTS_2865	-1.41351	0.0067088	glucose dehydrogenase
FCTS_1871	-1.4122	0.0489616	Unknown
FCTS_2634	-1.41198	0.00352101	heat-responsive protein 12
FCTS_23930	-1.41177	0.00280889	hypothetical protein EAG 05267 [Camponotus floridanus]
FCTS_18786	-1.41025	0.0086952	Unknown
FCTS_3009	-1.40949	0.00670077	Unknown
FCTS_2140	-1.40856	0.0159597	Unknown
FCTS_17025	-1.40835	0.0162879	Unknown
FCTS_10472	-1.40779	0.00124471	scavenger receptor class b member 1 isoform 1
FCTS_7110	-1.40703	0.00349725	4-aminobutyrate mitochondrial
FCTS_6304	-1.40697	0.0109725	integrin beta 4
FCTS_13807	-1.40645	0.00884392	glycerophosphoryl diester phosphodiesterase
FCTS_34127	-1.40499	0.00450911	transforming growth factor-beta-induced protein ig-h3-like
FCTS_17783	-1.40395	0.0178825	Unknown
FCTS_10232	-1.40304	0.0367301	Unknown
FCTS_1825	-1.40192	0.00781591	lysosome membrane protein 2-like
FCTS_33695	-1.4016	0.00499676	novel krab box and zinc c2h2 type domain containing protein
FCTS_13619	-1.40138	0.0089006	protein with signal peptide plus thr possible mucin
FCTS_15841	-1.40132	0.00722537	Unknown
FCTS_3619	-1.40128	0.0410008	loc799646 protein
FCTS_19404	-1.40005	0.0217551	PREDICTED: hypothetical protein LOC100611452 [Pan troglodytes]
FCTS_21023	-1.39961	0.0116009	hypothetical protein UM05154.1 [Ustilago maydis 521]
FCTS_11597	-1.39797	0.0159597	Unknown
FCTS_6267	-1.39348	0.00169366	sec14-like protein 2
FCTS_2564	-1.39302	0.0255521	myosin heavy chain
FCTS_17961	-1.38944	0.00735543	Unknown
FCTS_6289	-1.38886	0.0122136	organic cation transporter
FCTS_21481	-1.38848	0.00476152	Unknown
FCTS_3766	-1.38824	0.0137296	Unknown
FCTS_19734	-1.38814	0.00864279	Unknown
FCTS_22362	-1.38793	0.00162932	Unknown
FCTS_24751	-1.38779	0.0145227	Unknown
FCTS_22445	-1.38733	0.00660226	lipase member h
FCTS_11784	-1.3872	0.00280889	spherulin 4 precursor-like protein
FCTS_22983	-1.38717	0.0120789	probable cytochrome p450 305a1-like
FCTS_378	-1.38685	0.0152561	Unknown
FCTS_1242	-1.38615	0.00209323	phosphatidylethanolamine-binding protein
FCTS_16070	-1.38604	0.00853082	Unknown
FCTS_32584	-1.38578	0.0168689	Unknown
FCTS_27065	-1.38558	0.0185855	210kda protein
FCTS_22077	-1.38522	0.00517344	Unknown
FCTS_16557	-1.38431	0.0203942	Unknown
FCTS_13654	-1.38357	0.007348	Unknown
FCTS_14076	-1.38236	0.00459027	cytochrome p450 2p2
FCTS_11260	-1.38233	0.00558344	Unknown
FCTS_24052	-1.3822	0.00576857	Unknown
FCTS_18362	-1.38172	0.00268277	Unknown
FCTS_10998	-1.38166	0.0228042	nitrilase 2
FCTS_11614	-1.38147	0.0149533	Unknown
FCTS_11575	-1.37974	0.0305656	isoform g
FCTS_15834	-1.3797	0.00984786	Unknown
FCTS_24838	-1.37864	0.00298977	Unknown
FCTS_33892	-1.37655	0.0042825	Unknown
FCTS_17056	-1.37617	0.0311736	Unknown
FCTS_13403	-1.37591	0.00558181	myofilin variant a
FCTS_21169	-1.37557	0.0265242	Unknown
FCTS_15556	-1.37529	0.00323076	Unknown
FCTS_35023	-1.37365	0.00768913	Unknown
FCTS_9906	-1.3732	0.0137427	schwannomin interacting
FCTS_26924	-1.37293	0.00747055	Unknown
FCTS_969	-1.37207	0.0176758	serine protease inhibitor serpin-4
FCTS_1748	-1.37163	0.0461014	alanine-glyoxylate aminotransferase
FCTS_19552	-1.37097	0.00400064	Unknown
FCTS_27855	-1.37044	0.00358801	Unknown
FCTS_3974	-1.36974	0.00218977	muscle lim protein
FCTS_18344	-1.36958	0.0145441	Unknown
FCTS_17829	-1.36951	0.00438128	Unknown
FCTS_4783	-1.36882	0.00124471	Unknown
FCTS_25695	-1.36681	0.00159192	Unknown
FCTS_3203	-1.36673	0.0019446	ryanodine receptor
FCTS_5274	-1.36518	0.022686	Unknown
FCTS_1783	-1.36516	0.0211836	conserved hypothetical protein [Pediculus humanus corporis]
FCTS_2853	-1.36473	0.00673601	protein lethal essential for life-like
FCTS_10412	-1.36433	0.00363647	Unknown
FCTS_6119	-1.36391	0.00278411	Unknown
FCTS_30888	-1.36387	0.00583218	titin
FCTS_35187	-1.36231	0.0036297	kynureninase
FCTS_32589	-1.36192	0.023932	Unknown
FCTS_10733	-1.36174	0.0352778	g-protein coupled receptor mth2-like
FCTS_26720	-1.36146	0.00852987	Unknown
FCTS_23404	-1.36092	0.00486221	Unknown
FCTS_22034	-1.36046	0.00849148	Unknown
FCTS_5367	-1.35932	0.00515504	deoxyribose-phosphate aldolase
FCTS_18121	-1.35778	0.0111724	protease m1 zinc metalloprotease
FCTS_24182	-1.35776	0.0187025	peptidyl-glycine alpha-amidating monooxygenase a precursor
FCTS_32191	-1.35741	0.00218977	Unknown
FCTS_9421	-1.35702	0.0147993	24-dehydrocholesterol reductase
FCTS_12017	-1.357	0.0182432	zinc finger and btb domain-containing protein
FCTS_33226	-1.35699	0.00575915	Unknown
FCTS_17313	-1.35632	0.0173419	Unknown
FCTS_16567	-1.35599	0.0377129	Unknown
FCTS_11435	-1.35583	0.0332718	rtx toxin
FCTS_4649	-1.35576	0.00481854	Unknown
FCTS_14409	-1.35556	0.00744136	Unknown
FCTS_8972	-1.35553	0.0219803	troponin i
FCTS_28460	-1.35458	0.00131	Unknown
FCTS_5898	-1.35454	0.00890135	t family of potassium channels protein 18-like
FCTS_980	-1.35416	0.00322747	hydroxyacid oxidase 1-like
FCTS_19760	-1.35311	0.0204085	Unknown
FCTS_18289	-1.3516	0.00828113	protein related to plant expansins
FCTS_1671	-1.351	0.0411894	Unknown
FCTS_6321	-1.3488	0.0043253	glycine c-acetyltransferase 2-amino-3-ketobutyrate-
FCTS_9577	-1.34867	0.00249361	tryptophan oxygenase
FCTS_17226	-1.34811	0.015257	Unknown
FCTS_153	-1.34779	0.0260366	Unknown
FCTS_2552	-1.34768	0.00240001	Unknown
FCTS_19228	-1.34729	0.0105976	Unknown
FCTS_21403	-1.34709	0.036007	Unknown
FCTS_23918	-1.34685	0.0115811	Unknown
FCTS_811	-1.34645	0.00757439	receptor-type tyrosine-protein phosphatase n2
FCTS_8297	-1.34592	0.0197013	glucose dehydrogenase
FCTS_1109	-1.34517	0.00209679	gli pathogenesis-related 2
FCTS_21769	-1.34492	0.0249503	Unknown
FCTS_2374	-1.34461	0.00408744	Unknown
FCTS_15063	-1.34428	0.00280889	Unknown
FCTS_2031	-1.34356	0.00466978	cg32687
FCTS_30554	-1.34263	0.00708698	Unknown
FCTS_5331	-1.34246	0.00192365	Unknown
FCTS_10111	-1.3423	0.0081891	methylthioadenosine phosphorylase
FCTS_18156	-1.34052	0.00767718	Unknown
FCTS_4270	-1.34027	0.00124471	Unknown
FCTS_2242	-1.33877	0.00569351	b( +)-type amino acid transporter 1
FCTS_10382	-1.33874	0.0145274	phospholipase carboxylesterase
FCTS_7933	-1.3387	0.0316981	protein kinase-like domain
FCTS_20160	-1.3383	0.010343	L-xylulose reductase, putative [Perkinsus marinus ATCC 50983]
FCTS_15792	-1.33817	0.0129267	protein
FCTS_11029	-1.33781	0.0405593	sodium-independent sulfate anion transporter-like
FCTS_3554	-1.33721	0.0348188	peritrophic matrix protein 5-a
FCTS_18332	-1.33694	0.0154681	receptor protein tyrosine
FCTS_17347	-1.33649	0.00162932	hydrolase
FCTS_32206	-1.33629	0.00288345	Unknown
FCTS_137	-1.33566	0.00861554	Unknown
FCTS_22221	-1.33538	0.0112575	Unknown
FCTS_12780	-1.33485	0.00360426	spectrin alpha chain
FCTS_31458	-1.33459	0.00383937	Unknown
FCTS_10056	-1.33422	0.00141155	voltage-sensitive sodium channel
FCTS_27977	-1.33361	0.00465435	Unknown
FCTS_2034	-1.33245	0.0271567	Unknown
FCTS_18109	-1.33148	0.00289371	Unknown
FCTS_24832	-1.33139	0.0179528	Unknown
FCTS_21309	-1.33091	0.0176911	cyclopentanone -monooxygenase
FCTS_13016	-1.33052	0.0102588	hedgehog
FCTS_7748	-1.33015	0.0400781	hypothetical protein SELMODRAFT 413294 [Selaginella moellendorffii]
FCTS_9751	-1.32877	0.0073097	Unknown
FCTS_28081	-1.32791	0.0182916	Unknown
FCTS_17577	-1.32787	0.00919902	Unknown
FCTS_14748	-1.32763	0.0182549	Unknown
FCTS_22715	-1.32735	0.00983567	troponin c
FCTS_2177	-1.32718	0.00432923	Unknown
FCTS_19915	-1.32689	0.0080611	Unknown
FCTS_35236	-1.32594	0.00799348	apeg-1 protein
FCTS_9427	-1.32502	0.0290023	muscle-specific protein isoform b
FCTS_25895	-1.32477	0.00172877	Unknown
FCTS_8095	-1.32475	0.00346435	glutathione s-transferase
FCTS_20341	-1.32463	0.007879	Unknown
FCTS_22104	-1.32426	0.00166516	Unknown
FCTS_29895	-1.32408	0.00710479	Unknown
FCTS_6343	-1.32182	0.0266136	glucose dehydrogenase
FCTS_9283	-1.32168	0.00472456	Unknown
FCTS_19087	-1.32064	0.00186178	Unknown
FCTS_30581	-1.32061	0.0254009	cg33099 cg33099-pa
FCTS_6294	-1.31976	0.00295229	glutamate-gated chloride channel
FCTS_19211	-1.31959	0.014534	patj homolog
FCTS_24174	-1.31891	0.00659238	Unknown
FCTS_9426	-1.31877	0.00138557	moxd1-like protein 1
FCTS_15881	-1.31869	0.0334751	Unknown
FCTS_957	-1.31818	0.0233018	oligopeptide transporter
FCTS_8811	-1.31813	0.0139196	galactose-specific c-type
FCTS_5711	-1.31812	0.0130036	aldehyde oxidase
FCTS_9372	-1.31783	0.0236759	Unknown
FCTS_14069	-1.3169	0.0215517	nhl repeat-containing
FCTS_6647	-1.31681	0.00955571	Unknown
FCTS_13418	-1.31588	0.00391083	Unknown
FCTS_21043	-1.31553	0.0128398	myosin heavy chain
FCTS_23443	-1.31521	0.0248113	Unknown
FCTS_17207	-1.3152	0.0419742	Unknown
FCTS_10479	-1.31464	0.00240081	af378002 1 transposase
FCTS_24706	-1.31441	0.013093	dna polymerase eta
FCTS_6814	-1.31391	0.00375373	Unknown
FCTS_17491	-1.31219	0.00442338	protein arginine n-methyltransferase
FCTS_9861	-1.31211	0.00545946	subtilisin bpn precursor
FCTS_7155	-1.30975	0.0100183	ws dgat mgat
FCTS_17406	-1.30928	0.00860871	Unknown
FCTS_5083	-1.3088	0.00443229	hemocyte protein-glutamine gamma-glutamyltransferase-like
FCTS_6917	-1.30879	0.00381272	Unknown
FCTS_13913	-1.30751	0.0080545	Unknown
FCTS_5556	-1.3065	0.00425538	sec14-like protein
FCTS_31510	-1.30381	0.0498472	Unknown
FCTS_20033	-1.30294	0.00710358	Unknown
FCTS_30957	-1.3025	0.0224387	cg5783 cg5783-pa
FCTS_5813	-1.3025	0.00474134	adenylate cyclase
FCTS_3420	-1.30225	0.0301883	glutamate dehydrogenase
FCTS_370	-1.30179	0.0125044	alanine-glyoxylate transaminase
FCTS_4317	-1.30155	0.00580556	Unknown
FCTS_11193	-1.30087	0.0193596	Unknown
FCTS_25937	-1.30053	0.0224764	Unknown
FCTS_29955	-1.29891	0.0220142	Unknown
FCTS_10020	-1.29822	0.00288944	heat shock protein
FCTS_11211	-1.29798	0.00376819	Unknown
FCTS_10306	-1.29776	0.0061648	Unknown
FCTS_2101	-1.29727	0.00486876	Unknown
FCTS_7053	-1.2968	0.0043253	Unknown
FCTS_11618	-1.29675	0.00562803	oxidoreductase htatip2
FCTS_10756	-1.29674	0.00159522	glutaminase kidney mitochondrial-like
FCTS_5753	-1.29507	0.0145929	Unknown
FCTS_5238	-1.29489	0.00232269	alpha-tocopherol transfer
FCTS_459	-1.29444	0.0183701	prolyl endopeptidase-like
FCTS_3532	-1.29338	0.00471999	villin 1
FCTS_4113	-1.29296	0.00534534	rho guanine nucleotide exchange factor 10-like
FCTS_13963	-1.29143	0.00897968	muscle-specific protein isoform b
FCTS_11259	-1.29074	0.0280912	Unknown
FCTS_16669	-1.29048	0.0122158	fatty acid
FCTS_30700	-1.29042	0.00569236	Unknown
FCTS_18548	-1.28971	0.0447981	moxd1 protein
FCTS_17495	-1.28639	0.00958009	predicted protein [Arabidopsis lyrata subsp. lyrata]
FCTS_17725	-1.28636	0.00255077	Unknown
FCTS_17093	-1.28557	0.00569786	Unknown
FCTS_28257	-1.28542	0.00280185	elongation of very long chain fatty acids protein 6
FCTS_3510	-1.28523	0.0134942	hemicentin 1
FCTS_23909	-1.28512	0.00179954	Unknown
FCTS_3806	-1.28329	0.028797	Unknown
FCTS_11818	-1.28241	0.024206	Unknown
FCTS_4267	-1.28232	0.0291866	myosin light chain
FCTS_4864	-1.28196	0.00274813	neurotransmitter gated ion channel
FCTS_29297	-1.2818	0.0125639	Unknown
FCTS_7083	-1.28166	0.0130017	Unknown
FCTS_29872	-1.28164	0.0305052	Unknown
FCTS_14269	-1.28156	0.0165862	Unknown
FCTS_282	-1.28124	0.0167018	muscle-specific protein isoform f
FCTS_3132	-1.28093	0.0192992	esterase fe4
FCTS_16775	-1.28045	0.00636851	Unknown
FCTS_10410	-1.28008	0.0186026	Unknown
FCTS_6055	-1.27921	0.0450848	set and mynd domain-containing protein 4
FCTS_26007	-1.27854	0.0029791	Unknown
FCTS_497	-1.27762	0.0311736	Unknown
FCTS_11509	-1.27442	0.00353543	Unknown
FCTS_13389	-1.27429	0.00389832	glass transcription factor
FCTS_21141	-1.2737	0.0409257	Unknown
FCTS_1665	-1.27233	0.00269276	l 01289 h9 form
FCTS_28753	-1.27215	0.00268277	Unknown
FCTS_21190	-1.2719	0.0371109	juvenile hormone-inducible protein
FCTS_7031	-1.27179	0.0466251	isoform e
FCTS_25279	-1.27097	0.020822	serine protease family s08a
FCTS_4509	-1.26974	0.0192238	Unknown
FCTS_10257	-1.26879	0.00232269	Unknown
FCTS_13437	-1.26869	0.00205986	isoform b
FCTS_34252	-1.26838	0.023449	Unknown
FCTS_18800	-1.26784	0.0139927	kelch-like protein 38
FCTS_6560	-1.267	0.0114596	udp glucuronosyltransferase 1 polypeptide a5
FCTS_7063	-1.26549	0.0144495	cg11044 cg11044-pa
FCTS_3494	-1.26536	0.00194807	Unknown
FCTS_28209	-1.26533	0.00905343	Unknown
FCTS_8885	-1.26503	0.0105757	orf2-encoded protein
FCTS_21150	-1.26482	0.0176965	Unknown
FCTS_32953	-1.26415	0.00831915	Unknown
FCTS_18131	-1.26331	0.00215211	sulfite mitochondrial
FCTS_5313	-1.26228	0.0223122	serine threonine-protein kinase
FCTS_21436	-1.26183	0.0230553	Unknown
FCTS_32439	-1.26149	0.00333999	Unknown
FCTS_3880	-1.26147	0.023388	chitin deacetylase-like isoform h
FCTS_20404	-1.26048	0.00188134	Unknown
FCTS_1931	-1.26028	0.00745868	Unknown
FCTS_11601	-1.26022	0.0255814	Unknown
FCTS_25923	-1.25898	0.00815814	Unknown
FCTS_12558	-1.25677	0.0348188	sideroflexin 1
FCTS_17910	-1.25655	0.0298711	Unknown
FCTS_11529	-1.25608	0.0244438	Unknown
FCTS_11543	-1.25571	0.00127993	Unknown
FCTS_5895	-1.25555	0.0393669	unc93a protein
FCTS_22880	-1.25545	0.0018315	udp glucuronosyltransferase 2 polypeptide isoform cra a
FCTS_1003	-1.25543	0.0251016	Unknown
FCTS_8906	-1.2552	0.0369204	isoform g
FCTS_15695	-1.25352	0.0057727	carboxylesterase-6 [Aedes aegypti]
FCTS_12237	-1.2531	0.00674481	low quality protein: talin-2-like
FCTS_17222	-1.25277	0.00918437	Unknown
FCTS_2994	-1.25248	0.0235532	Unknown
FCTS_25078	-1.25226	0.00166516	trithorax group protein osa
FCTS_4093	-1.252	0.0392584	protein disulfide-isomerase a4 precursor
FCTS_14215	-1.25192	0.00315271	Unknown
FCTS_24288	-1.25147	0.00860494	PREDICTED: hypothetical protein, partial [Hydra magnipapillata]
FCTS_22009	-1.25127	0.0268516	Unknown
FCTS_4193	-1.25119	0.00610106	sodium bicarbonate cotransporter
FCTS_22935	-1.2511	0.0221383	aldehyde dehydrogenase mitochondrial-like
FCTS_17379	-1.25104	0.00676041	Unknown
FCTS_24596	-1.25098	0.00131	Unknown
FCTS_15140	-1.2508	0.00335801	ras-related and estrogen-regulated growth inhibitor-like
FCTS_7720	-1.25041	0.0308939	Unknown
FCTS_33141	-1.25008	0.0158779	Unknown
FCTS_9694	-1.24947	0.0225205	l 01289 long form
FCTS_15935	-1.24889	0.00277912	Unknown
FCTS_20789	-1.24806	0.03747	Unknown
FCTS_23813	-1.24794	0.00369858	Unknown
FCTS_3989	-1.24729	0.0105976	3-oxoacyl-acyl-carrier-protein reductase
FCTS_23437	-1.24652	0.0346206	Unknown
FCTS_27261	-1.24575	0.00641827	glutathione s-transferase
FCTS_8671	-1.24563	0.0131668	Unknown
FCTS_695	-1.24516	0.0263779	heat shock protein beta-1
FCTS_804	-1.24515	0.0253764	xaa-pro aminopeptidase
FCTS_5760	-1.24406	0.0284589	vesicular mannose-binding lectin
FCTS_26755	-1.24393	0.0166875	Unknown
FCTS_6764	-1.24348	0.0141481	dbh-like 1
FCTS_16900	-1.24346	0.0498286	alpha-amylase
FCTS_17143	-1.24277	0.0187759	dm9 domain-containing protein
FCTS_11115	-1.24268	0.00131	pancreatic lipase-related protein 2
FCTS_14998	-1.2423	0.0270861	Unknown
FCTS_23275	-1.24141	0.00438689	Unknown
FCTS_16276	-1.2411	0.0227125	Unknown
FCTS_9441	-1.24098	0.045457	Unknown
FCTS_20114	-1.24033	0.00247531	Unknown
FCTS_30224	-1.23999	0.00180681	Unknown
FCTS_18302	-1.23943	0.00371871	nfx1-type zinc finger-containing protein 1
FCTS_29327	-1.23931	0.0036297	Unknown
FCTS_18045	-1.23922	0.0066614	myosin heavy chain
FCTS_7683	-1.23921	0.0373236	Unknown
FCTS_8932	-1.23866	0.00257623	Unknown
FCTS_31221	-1.23856	0.0200941	Unknown
FCTS_25669	-1.23795	0.00239475	Unknown
FCTS_27951	-1.23772	0.0224451	dna repair protein
FCTS_5483	-1.23719	0.0405819	hydroxyacid oxidase 1-like
FCTS_13228	-1.23673	0.0439124	Unknown
FCTS_9396	-1.23634	0.0273552	Unknown
FCTS_14465	-1.23603	0.0228118	Unknown
FCTS_3943	-1.23581	0.00239475	Unknown
FCTS_9623	-1.23538	0.0216397	Unknown
FCTS_4715	-1.23493	0.00297137	protein
FCTS_8903	-1.23413	0.0281175	Unknown
FCTS_28246	-1.23363	0.0439619	beta-glucosidase
FCTS_11238	-1.23299	0.00783697	Unknown
FCTS_13574	-1.23276	0.00131	Unknown
FCTS_34492	-1.232	0.00138557	Unknown
FCTS_31327	-1.2319	0.00208669	Unknown
FCTS_22754	-1.23129	0.0098925	Unknown
FCTS_4682	-1.23121	0.044583	Unknown
FCTS_14505	-1.23028	0.022298	Unknown
FCTS_16025	-1.22989	0.00213399	Unknown
FCTS_8408	-1.22892	0.00297966	cre-mup-4 protein
FCTS_2289	-1.22884	0.00476152	isoform c
FCTS_2668	-1.22719	0.00264674	elongation of very long chain fatty acids protein 6
FCTS_16544	-1.22637	0.0127437	Unknown
FCTS_6924	-1.2255	0.00595076	piggybac transposable element-derived protein 4-like
FCTS_21210	-1.22533	0.0033165	Unknown
FCTS_31512	-1.22514	0.0238259	uncharacterized transposon-derived
FCTS_2137	-1.22487	0.0406532	microtubule-associated protein
FCTS_11009	-1.22455	0.0434933	Unknown
FCTS_18730	-1.22439	0.048759	calcium-binding protein cml20
FCTS_23872	-1.22361	0.00853082	Unknown
FCTS_29070	-1.22361	0.0139473	carbohydrate binding family 6
FCTS_20044	-1.22359	0.0240533	Unknown
FCTS_14986	-1.22332	0.00992327	domain-containing protein
FCTS_32700	-1.22318	0.0357458	Unknown
FCTS_12035	-1.22313	0.00646506	Unknown
FCTS_20221	-1.2227	0.0036099	Unknown
FCTS_22343	-1.22267	0.0073097	zinc finger homeobox protein 4-like
FCTS_12167	-1.22255	0.0219527	mosc domain-containing protein mitochondrial-like
FCTS_14427	-1.22251	0.00847591	aldehyde oxidase
FCTS_12604	-1.22222	0.00220823	Unknown
FCTS_6875	-1.22215	0.00220157	sodium-dependent neutral amino acid transporter slc6a17-like isoform 1
FCTS_23146	-1.22166	0.0297924	Unknown
FCTS_17865	-1.22106	0.0393077	Unknown
FCTS_13598	-1.22062	0.00575386	Unknown
FCTS_14660	-1.22052	0.0123204	Unknown
FCTS_14375	-1.22039	0.0280766	large atp-binding protein
FCTS_593	-1.21994	0.00944708	isoform c
FCTS_6903	-1.21972	0.0043951	dna repair protein rad50
FCTS_8341	-1.21939	0.0035214	sodium potassium-transporting atpase subunit beta-2-like
FCTS_15375	-1.21928	0.0282524	Unknown
FCTS_4754	-1.21844	0.00232269	carbonic anhydrase
FCTS_3579	-1.21843	0.00651151	protein yellow
FCTS_21176	-1.21834	0.0140621	Unknown
FCTS_19304	-1.21814	0.00810167	Unknown
FCTS_3103	-1.2179	0.0204606	short-chain dehydrogenease reductase-like protein
FCTS_30802	-1.21775	0.00467491	Unknown
FCTS_29028	-1.2166	0.0277255	Unknown
FCTS_944	-1.21592	0.0174451	microtubule-actin cross-linking factor 1-like
FCTS_15356	-1.21534	0.0163996	Unknown
FCTS_14726	-1.21481	0.0266889	Unknown
FCTS_27731	-1.21393	0.0137588	lipopolysaccharide-induced tumor necrosis factor-alpha factor homolog
FCTS_9333	-1.21365	0.00191037	Unknown
FCTS_24494	-1.21345	0.0041971	Unknown
FCTS_7009	-1.21342	0.0343239	nfx1-type zinc finger-containing protein 1-like
FCTS_6479	-1.21236	0.0059683	Unknown
FCTS_1246	-1.21226	0.00787929	glucosyl glucuronosyl transferases
FCTS_27896	-1.21209	0.00933642	dna pol b2 domain-containing protein
FCTS_3151	-1.21126	0.00580556	uncharacterized oxidoreductase dhs-27-like
FCTS_8296	-1.21075	0.00370467	ecdysone 20-monooxygenase-like
FCTS_4374	-1.21072	0.0032398	ferric-chelate reductase 1-like
FCTS_7636	-1.21042	0.0380615	Unknown
FCTS_31736	-1.2103	0.00405622	Unknown
FCTS_20656	-1.21025	0.00217133	Unknown
FCTS_24618	-1.21009	0.00953557	Unknown
FCTS_8159	-1.20994	0.00412474	gaba-gated chloride
FCTS_10950	-1.20923	0.040171	muscle myosin heavy chain
FCTS_1373	-1.20885	0.0067709	esterase fe4
FCTS_21214	-1.20799	0.0125802	AF435789 1ultrabithorax [Folsomia candida]
FCTS_6011	-1.20773	0.00243076	glutathione s-transferase-like
FCTS_29431	-1.20756	0.0152784	Unknown
FCTS_22500	-1.20742	0.0159306	maltase- intestinal
FCTS_13121	-1.20662	0.00476152	PREDICTED: hypothetical protein LOC100114973 [Nasonia vitripennis]
FCTS_20327	-1.20621	0.00346144	Unknown
FCTS_9007	-1.20573	0.00732206	lethal essential for life l2efl
FCTS_19795	-1.20493	0.0105615	hypothetical protein WPa 1377 [Wolbachia endosymbiont of Culex quinquefasciatus Pel]
FCTS_18238	-1.20421	0.0220284	short-chain dehydrogenase
FCTS_7158	-1.20412	0.00900843	molecule interacting with isoform b
FCTS_3217	-1.20385	0.00239475	transposase homolog
FCTS_17776	-1.20242	0.0373236	Unknown
FCTS_3973	-1.20193	0.0229013	cytochrome p450 2j2-like
FCTS_18812	-1.20106	0.0163971	Unknown
FCTS_20630	-1.20082	0.00915069	Unknown
FCTS_20405	-1.20068	0.0136815	Unknown
FCTS_21171	-1.19899	0.00576386	Unknown
FCTS_25869	-1.19874	0.0454156	Unknown
FCTS_4598	-1.19835	0.0404712	Unknown
FCTS_20089	-1.19798	0.0116149	Unknown
FCTS_22137	-1.19789	0.0323032	hypothetical protein CRE 25335 [Caenorhabditis remanei]
FCTS_2835	-1.19742	0.0480596	Unknown
FCTS_31078	-1.19715	0.00210452	Unknown
FCTS_2096	-1.19709	0.0389976	Unknown
FCTS_2356	-1.19708	0.0103333	sarcalumenin
FCTS_21467	-1.19701	0.00890701	tyramine oxidase
FCTS_3761	-1.19693	0.00205959	Unknown
FCTS_7953	-1.19628	0.00520327	Unknown
FCTS_20463	-1.19605	0.00532148	Unknown
FCTS_32977	-1.19579	0.00264674	Unknown
FCTS_11573	-1.19538	0.00131	Unknown
FCTS_25708	-1.1947	0.0197013	nfx1-type zinc finger-containing protein 1-like
FCTS_1652	-1.19467	0.0267435	dipeptidase 1-like
FCTS_24558	-1.19439	0.0217388	Unknown
FCTS_7945	-1.19336	0.0126222	isoform c
FCTS_34047	-1.19297	0.0329167	Unknown
FCTS_23165	-1.19276	0.00861032	zinc finger protein
FCTS_1464	-1.19263	0.00645112	endoribonuclease l-psp
FCTS_7841	-1.19263	0.0253415	Unknown
FCTS_17118	-1.1922	0.00505323	Unknown
FCTS_1012	-1.19169	0.0430279	ofd1 protein
FCTS_9213	-1.19133	0.00404681	Unknown
FCTS_2015	-1.19107	0.0170231	cathepsin l
FCTS_18703	-1.1909	0.00879333	Unknown
FCTS_1101	-1.19004	0.0173311	leucine-rich transmembrane protein
FCTS_9941	-1.1896	0.0322319	Unknown
FCTS_23798	-1.18953	0.0173591	hypothetical protein TcasGA2 TC006179 [Tribolium castaneum]
FCTS_25659	-1.18898	0.0328023	nucleoside diphosphate kinase homolog 5-like
FCTS_826	-1.18871	0.00232269	tnf receptor-associated factor 6
FCTS_16514	-1.18857	0.0475618	Unknown
FCTS_21072	-1.1885	0.0103977	pt repeat family protein
FCTS_31670	-1.1885	0.00138557	Unknown
FCTS_5832	-1.18821	0.00164336	type ii
FCTS_33022	-1.18755	0.00591301	Unknown
FCTS_28766	-1.1869	0.0324588	protein c-ets-1-
FCTS_23816	-1.18685	0.0373811	Unknown
FCTS_26319	-1.1868	0.0166314	Unknown
FCTS_34157	-1.18646	0.004474	Unknown
FCTS_33838	-1.18635	0.0178541	Unknown
FCTS_30081	-1.18596	0.020308	Unknown
FCTS_23043	-1.18573	0.00239475	isoform b
FCTS_7592	-1.18555	0.00913588	Unknown
FCTS_7418	-1.18554	0.0217747	venus kinase receptor
FCTS_3931	-1.18342	0.0279014	Unknown
FCTS_16322	-1.18128	0.0342216	Unknown
FCTS_14942	-1.17993	0.00777655	Unknown
FCTS_10958	-1.17961	0.0168218	protein isoform
FCTS_29503	-1.17915	0.00522808	Unknown
FCTS_6670	-1.1788	0.00905221	Unknown
FCTS_18940	-1.17871	0.00907957	Unknown
FCTS_30945	-1.17862	0.00915069	Unknown
FCTS_13679	-1.17852	0.0284008	potassium sodium hyperpolarization-activated cyclic nucleotide-gated channel 4
FCTS_2063	-1.17826	0.0434709	Unknown
FCTS_10118	-1.17748	0.00313859	succinate-semialdehyde dehydrogenase
FCTS_22328	-1.17678	0.0458522	Unknown
FCTS_22068	-1.17644	0.0342016	Unknown
FCTS_31318	-1.17603	0.00295548	Unknown
FCTS_2962	-1.17594	0.00517344	Unknown
FCTS_1125	-1.17587	0.0105976	unnamed protein product [Oikopleura dioica]
FCTS_12884	-1.17504	0.0395345	probable palmitoyltransferase zdhhc20-like
FCTS_22823	-1.17459	0.0280912	Unknown
FCTS_18381	-1.17424	0.00826121	Unknown
FCTS_20871	-1.17391	0.00361207	Unknown
FCTS_20934	-1.17391	0.00492461	Unknown
FCTS_21675	-1.17215	0.00323816	Unknown
FCTS_23425	-1.17193	0.0477452	aminoacylase 1-like
FCTS_13996	-1.17171	0.00415955	Unknown
FCTS_21498	-1.17167	0.00514159	Unknown
FCTS_16059	-1.17152	0.00932167	Unknown
FCTS_17057	-1.17121	0.00431924	Unknown
FCTS_26959	-1.1706	0.0235929	Unknown
FCTS_21792	-1.17029	0.00748254	Unknown
FCTS_26172	-1.17026	0.00127993	Unknown
FCTS_31671	-1.17012	0.00335225	Unknown
FCTS_6493	-1.16928	0.00887824	cell division cycle 2-like protein kinase 5
FCTS_11938	-1.16926	0.0202653	serine threonine-protein kinase sik3-like
FCTS_3157	-1.16926	0.0396104	chitin binding peritrophin-
FCTS_26031	-1.16919	0.0435981	Unknown
FCTS_25832	-1.1683	0.00273309	Unknown
FCTS_15507	-1.16805	0.0240478	Unknown
FCTS_17946	-1.1678	0.00335801	Unknown
FCTS_27843	-1.16713	0.0263828	Unknown
FCTS_26920	-1.16687	0.00471496	atl2 protein
FCTS_17919	-1.16636	0.00162932	Unknown
FCTS_3369	-1.1655	0.00243062	dehydrogenase reductase sdr family member 7-like
FCTS_11306	-1.16527	0.0422056	muscle myosin heavy chain
FCTS_22031	-1.16466	0.00202587	Unknown
FCTS_29216	-1.16296	0.00933679	Unknown
FCTS_5323	-1.1621	0.0225978	sec14-like protein
FCTS_23846	-1.16187	0.00171978	PREDICTED: similar to transposase-like [Hydra magnipapillata]
FCTS_6452	-1.16169	0.00242648	glutathione s-transferase-like
FCTS_26985	-1.16163	0.0130573	Unknown
FCTS_5209	-1.16105	0.00552102	cap-specific mrna (nucleoside-2 -o-)-methyltransferase 1-like
FCTS_25598	-1.16085	0.00316525	cell division abc permease protein
FCTS_9496	-1.16041	0.00363647	alcohol dehydrogenase
FCTS_10619	-1.16014	0.0092175	hypothetical protein DAPPUDRAFT 109886 [Daphnia pulex]
FCTS_6195	-1.16003	0.00993659	gtp cyclohydrolase i
FCTS_13958	-1.15979	0.00224596	Unknown
FCTS_32986	-1.15915	0.0270894	Unknown
FCTS_27384	-1.15885	0.00675526	Unknown
FCTS_6197	-1.15872	0.0214309	Unknown
FCTS_2782	-1.15843	0.00268277	sodium potassium-transporting atpase subunit beta-2-like
FCTS_1924	-1.15837	0.00782846	aminopeptidase n
FCTS_19780	-1.15817	0.0257047	Unknown
FCTS_7852	-1.15791	0.0386797	prolyl endopeptidase
FCTS_8994	-1.15785	0.00959036	glutamate-gated chloride channel
FCTS_19977	-1.15732	0.0441401	connector enhancer of kinase suppressor of ras 2-like
FCTS_9466	-1.15721	0.0161156	isoform b
FCTS_5498	-1.15674	0.00610106	acyl-coenzyme a:6-aminopenicillanic-acid-acyltransferase 40 kda form
FCTS_16074	-1.15668	0.0202562	Unknown
FCTS_31920	-1.15626	0.0171796	Unknown
FCTS_7201	-1.15608	0.00280185	isoform m
FCTS_5131	-1.15593	0.00262402	Unknown
FCTS_29487	-1.15589	0.03267	pro-phenol oxidase subunit 2
FCTS_9931	-1.15583	0.0194819	Unknown
FCTS_8503	-1.15535	0.0325088	glucose dehydrogenase
FCTS_5671	-1.15515	0.028577	glutamate-gated chloride channel partial
FCTS_10045	-1.1535	0.0052183	Unknown
FCTS_5509	-1.15324	0.0278169	juvenile hormone acid methyltransferase
FCTS_16462	-1.15312	0.00645617	phosphoglycerate mutase
FCTS_12336	-1.15253	0.0342209	Unknown
FCTS_33598	-1.15199	0.0059382	Unknown
FCTS_17278	-1.15113	0.0380968	Unknown
FCTS_20120	-1.1506	0.0419457	Unknown
FCTS_6118	-1.15056	0.0270119	Unknown
FCTS_9898	-1.14936	0.0150243	Unknown
FCTS_21820	-1.14925	0.0197616	chitin deacetylase-like isoform h
FCTS_13677	-1.1481	0.0219247	Unknown
FCTS_20783	-1.14771	0.0158848	Unknown
FCTS_16407	-1.14759	0.00644523	Unknown
FCTS_24770	-1.14699	0.0279446	Unknown
FCTS_18626	-1.14656	0.00874648	g protein-coupled receptor protein
FCTS_6759	-1.14639	0.00363647	dihydropyrimidinase-like isoform 1
FCTS_2846	-1.14629	0.0360889	nadh dehydrogenase iron-sulfur protein mitochondrial precursor
FCTS_5688	-1.146	0.00131	delta -sterol reductase-like
FCTS_2485	-1.14557	0.00442626	d-2-hydroxyglutarate mitochondrial-like
FCTS_11408	-1.14541	0.00964573	reverse transcriptase
FCTS_5668	-1.14521	0.00205959	serine threonine-protein kinase d3
FCTS_18484	-1.14447	0.00568058	Unknown
FCTS_20901	-1.14436	0.0270861	Unknown
FCTS_6430	-1.14426	0.0339443	proteasome activator complex subunit 1
FCTS_15303	-1.14378	0.00418333	hypothetical protein TcasGA2 TC010279 [Tribolium castaneum]
FCTS_6015	-1.14287	0.0222228	myosin light chain smooth muscle
FCTS_11305	-1.14253	0.00902825	apolipoprotein d-like
FCTS_18545	-1.14145	0.025015	suppressor of stomatin mutant uncoordination family member (ssu-2)-like
FCTS_23206	-1.14126	0.0043253	Unknown
FCTS_11566	-1.14107	0.0234233	lipid phosphate phosphohydrolase 1
FCTS_23625	-1.14082	0.0131608	Unknown
FCTS_19283	-1.14054	0.00622579	syntaxin 1a
FCTS_3290	-1.1399	0.00427015	prolyl 4-hydroxylase subunit alpha-1
FCTS_1310	-1.13985	0.0105675	sodium-dependent nutrient amino acid transporter 1-like
FCTS_8715	-1.13949	0.00680845	Unknown
FCTS_27926	-1.13906	0.00289669	Unknown
FCTS_272	-1.13876	0.00578544	Unknown
FCTS_5756	-1.13855	0.0168911	n-acetylmuramic acid 6-phosphate etherase
FCTS_28693	-1.13801	0.0220127	Unknown
FCTS_7176	-1.13774	0.00219832	Unknown
FCTS_7541	-1.13726	0.0271447	24-dehydrocholesterol reductase
FCTS_1308	-1.13676	0.00906069	sodium calcium exchanger 1
FCTS_16925	-1.13635	0.0232479	substance p receptor
FCTS_17429	-1.13563	0.0150847	Unknown
FCTS_20198	-1.13557	0.00898991	Unknown
FCTS_14601	-1.13529	0.00274785	protocadherin fat 3-like
FCTS_8823	-1.13506	0.00678135	synaptosomal-associated protein 25-like isoform 1
FCTS_10162	-1.13486	0.00828113	Unknown
FCTS_836	-1.13436	0.00795086	eukaryotic translation initiation factor 3 subunit k-like
FCTS_10238	-1.1341	0.0224816	Unknown
FCTS_663	-1.13386	0.00232269	cytochrome p450
FCTS_22161	-1.13286	0.0443763	Unknown
FCTS_8661	-1.13272	0.00292755	cg13419
FCTS_4490	-1.13246	0.00322242	Unknown
FCTS_14820	-1.1323	0.0249557	elongation factor 2
FCTS_9881	-1.13182	0.0304801	Unknown
FCTS_1328	-1.13162	0.0084566	Unknown
FCTS_35326	-1.13145	0.0412926	vitellogenin receptor
FCTS_7438	-1.1312	0.00353543	Unknown
FCTS_11592	-1.131	0.0498262	pancreatic triacylglycerol lipase precursor
FCTS_29127	-1.13051	0.0419979	cg7248 cg7248- partial
FCTS_16420	-1.13018	0.0238856	PREDICTED: hypothetical protein LOC100119461 [Nasonia vitripennis]
FCTS_26891	-1.13003	0.0386671	Unknown
FCTS_16624	-1.13003	0.00625209	Unknown
FCTS_27088	-1.12904	0.00339498	24-dehydrocholesterol reductase
FCTS_31251	-1.1289	0.00314333	Unknown
FCTS_11119	-1.12877	0.00469072	Unknown
FCTS_760	-1.12845	0.0208839	ryanodine receptor
FCTS_22560	-1.12822	0.0088836	peritrophin-like protein
FCTS_34579	-1.1272	0.0107968	Unknown
FCTS_1697	-1.12698	0.0216463	l-3-hydroxyacyl-coenzyme a short chain
FCTS_20172	-1.12687	0.00173039	Unknown
FCTS_14185	-1.12637	0.0116324	Unknown
FCTS_28588	-1.12552	0.00906685	Unknown
FCTS_11421	-1.12512	0.00863445	Unknown
FCTS_5219	-1.1251	0.0195156	Unknown
FCTS_33230	-1.12443	0.00598167	Unknown
FCTS_32105	-1.12419	0.02068	Unknown
FCTS_35112	-1.12409	0.00874648	isoform b
FCTS_5595	-1.12407	0.0188254	short-chain dehydrogenase reductase sdr
FCTS_19121	-1.12382	0.00662226	isoform a
FCTS_26835	-1.12317	0.00719756	Unknown
FCTS_27768	-1.12281	0.00957772	Unknown
FCTS_2148	-1.12235	0.0199805	Unknown
FCTS_19131	-1.1221	0.0234281	Unknown
FCTS_18503	-1.12207	0.0144495	Unknown
FCTS_12225	-1.12155	0.00465813	Unknown
FCTS_16363	-1.12136	0.00692738	Unknown
FCTS_5520	-1.12095	0.0306745	prolyl endopeptidase (prolyl oligopeptidase)
FCTS_19474	-1.12068	0.0215258	Unknown
FCTS_2173	-1.12048	0.0240034	insect intestinal mucin 3
FCTS_10342	-1.12023	0.00157294	phosphinothricin n-acetyltransferase
FCTS_5444	-1.11974	0.00200168	Unknown
FCTS_7060	-1.11954	0.00695839	Unknown
FCTS_23648	-1.11836	0.00232269	conserved domain protein
FCTS_29144	-1.11816	0.00193894	Unknown
FCTS_11490	-1.11812	0.00580512	Unknown
FCTS_18678	-1.11766	0.0363311	Unknown
FCTS_210	-1.11745	0.00348091	diamine acetyltransferase 2-like
FCTS_11014	-1.11737	0.00853127	Unknown
FCTS_5340	-1.11727	0.0201185	alcohol dehydrogenase
FCTS_21636	-1.11703	0.00269276	histone deacetylase 6-like
FCTS_8212	-1.11675	0.0206392	Unknown
FCTS_14111	-1.1164	0.0171902	Unknown
FCTS_17478	-1.1162	0.0116014	Unknown
FCTS_12723	-1.11593	0.00943492	potassium chloride symporter
FCTS_11976	-1.11565	0.013811	Unknown
FCTS_9431	-1.11475	0.00793466	xanthine dehydrogenase oxidase
FCTS_4218	-1.11454	0.00907673	juvenile hormone esterase
FCTS_11722	-1.11348	0.0046498	Unknown
FCTS_15557	-1.11296	0.0142232	Unknown
FCTS_30118	-1.11257	0.0230797	ryanodine receptor 44f
FCTS_32361	-1.11173	0.00994316	zinc finger
FCTS_1440	-1.1116	0.00218977	microsomal glutathione s-transferase 3
FCTS_19920	-1.11145	0.0218662	homeobox protein cut
FCTS_22917	-1.11058	0.0452552	cytoplasmic aconitate hydratase
FCTS_12253	-1.11016	0.0197896	sec14-like protein 2-like
FCTS_1421	-1.10999	0.0356297	alpha-tocopherol transfer protein
FCTS_27448	-1.10875	0.00312852	xanthine dehydrogenase
FCTS_34173	-1.10855	0.00367624	map kinase kinase skh1 pek1
FCTS_32452	-1.10827	0.0212044	Unknown
FCTS_13312	-1.10732	0.019125	Unknown
FCTS_13028	-1.10728	0.0361222	carbonyl reductase
FCTS_29238	-1.10702	0.0024308	Unknown
FCTS_9234	-1.107	0.011689	Unknown
FCTS_10482	-1.10698	0.0376185	transmembrane protein 20
FCTS_10015	-1.1069	0.00882851	rcc1 and btb domain-containing protein 1
FCTS_9910	-1.10624	0.0269256	Unknown
FCTS_5642	-1.10616	0.0166715	Unknown
FCTS_33901	-1.10554	0.00871921	Unknown
FCTS_867	-1.10543	0.0083709	cytochrome p450
FCTS_8282	-1.10523	0.00209679	cytochrome p450
FCTS_31996	-1.10479	0.00274813	Unknown
FCTS_13073	-1.10434	0.00239475	Unknown
FCTS_9264	-1.10407	0.0353613	Unknown
FCTS_11247	-1.10337	0.0346088	Unknown
FCTS_25148	-1.10323	0.00893652	Unknown
FCTS_15723	-1.10318	0.016201	carboxypeptidase b-like
FCTS_11748	-1.10314	0.00163786	GH19700 [Drosophila grimshawi]
FCTS_24495	-1.10293	0.00457588	Unknown
FCTS_7647	-1.10237	0.0219527	glutathione s-transferase
FCTS_15697	-1.10205	0.0455777	muscle-specific protein 300 cg33715-pd
FCTS_6443	-1.10189	0.00714683	glutamate ionotropic kainate 3 ( glur7)
FCTS_7092	-1.10168	0.00481745	conserved domain protein
FCTS_21004	-1.10154	0.048177	voltage-gated sodium channel alpha subunit
FCTS_27381	-1.10086	0.00968924	Unknown
FCTS_11402	-1.10053	0.00900843	Unknown
FCTS_33184	-1.10016	0.0490331	Unknown
FCTS_2725	-1.09997	0.00334171	isoform m
FCTS_2649	-1.09948	0.00323816	aminopeptidase n-like
FCTS_13942	-1.0993	0.00715166	Unknown
FCTS_23495	-1.0991	0.00284445	Unknown
FCTS_26735	-1.09826	0.00347032	Unknown
FCTS_16629	-1.09804	0.0143939	Unknown
FCTS_29604	-1.09794	0.0436647	anion bicarbonate porter family member (abts-1)
FCTS_7332	-1.09789	0.0413856	Unknown
FCTS_8340	-1.09787	0.00487352	Unknown
FCTS_28161	-1.09766	0.044038	aldehyde dehydrogenase
FCTS_10579	-1.09737	0.00757263	star protein
FCTS_11178	-1.0969	0.00163143	Unknown
FCTS_26527	-1.09682	0.0148601	juvenile hormone-inducible
FCTS_8433	-1.09618	0.0295135	Unknown
FCTS_12513	-1.09608	0.0129256	myosin
FCTS_20612	-1.09559	0.0210163	Unknown
FCTS_29256	-1.09505	0.0136815	Unknown
FCTS_18774	-1.09478	0.0134997	long-chain fatty acid transport protein 4-like
FCTS_3748	-1.0946	0.0218153	aldehyde dehydrogenase
FCTS_11923	-1.09451	0.0238102	Unknown
FCTS_13482	-1.09393	0.00729615	helicase conserved c-terminal domain containing protein
FCTS_23595	-1.09366	0.00566335	Unknown
FCTS_8235	-1.09314	0.0047882	serine threonine-protein kinase lmtk1
FCTS_34861	-1.09303	0.00871921	Unknown
FCTS_10001	-1.09261	0.0040563	venom carboxylesterase-6-like
FCTS_21472	-1.09204	0.0140242	protein kiaa0664 homolog
FCTS_20940	-1.09197	0.0429937	isoform j
FCTS_19635	-1.0919	0.0150635	Unknown
FCTS_9732	-1.09189	0.00539449	protein
FCTS_8712	-1.09174	0.00978213	protein with signal peptide plus thr possible mucin
FCTS_10429	-1.09129	0.0336876	diphenol oxidase
FCTS_15359	-1.09113	0.00884221	isoform b
FCTS_31059	-1.09032	0.00246288	ankyrin unc44
FCTS_22505	-1.09013	0.0238486	acid
FCTS_7795	-1.08983	0.0155431	peritrophic membrane chitin binding protein
FCTS_10629	-1.08976	0.0356297	potassium channel subfamily k member 18-like
FCTS_34657	-1.08965	0.0342627	isoform d
FCTS_288	-1.08946	0.00883874	isoform c
FCTS_3454	-1.08784	0.03347	Unknown
FCTS_24783	-1.08761	0.0174295	Unknown
FCTS_4658	-1.08748	0.0151585	isoform l
FCTS_4624	-1.08745	0.00600666	ankyrin unc44
FCTS_18593	-1.08724	0.00347037	Unknown
FCTS_11054	-1.0871	0.00853082	Unknown
FCTS_8854	-1.08695	0.00294362	iodide transporter-like protein
FCTS_11558	-1.08669	0.00453225	Unknown
FCTS_20529	-1.0865	0.0105372	Unknown
FCTS_10669	-1.08646	0.0153782	fucosyl transferase
FCTS_32744	-1.08644	0.00543763	Unknown
FCTS_18190	-1.08623	0.0452851	defensin-like protein 10
FCTS_10542	-1.08567	0.0269301	Unknown
FCTS_14641	-1.08549	0.00945822	Unknown
FCTS_14391	-1.08547	0.00423529	Unknown
FCTS_7218	-1.08522	0.0325066	hiv-1 tat interactive protein 30kda
FCTS_18026	-1.08374	0.0415449	hypothetical protein CAEBREN 19348 [Caenorhabditis brenneri]
FCTS_30301	-1.08331	0.00900843	Unknown
FCTS_13895	-1.08329	0.0186084	Unknown
FCTS_7278	-1.08315	0.0055257	Unknown
FCTS_31406	-1.08301	0.0353712	Unknown
FCTS_10910	-1.08294	0.00184978	Unknown
FCTS_28733	-1.08245	0.00300625	Unknown
FCTS_32133	-1.08206	0.0414951	Unknown
FCTS_10701	-1.08192	0.0366407	potassium voltage-gated channel protein shab
FCTS_22908	-1.08143	0.00944708	Unknown
FCTS_24389	-1.07982	0.00582197	Unknown
FCTS_23748	-1.07951	0.0154919	nadp transhydrogenase
FCTS_16781	-1.07949	0.0224719	Unknown
FCTS_6563	-1.07944	0.0329089	Unknown
FCTS_7833	-1.07944	0.0475705	long-chain fatty acid transport protein 4-like
FCTS_35008	-1.07889	0.00453396	Unknown
FCTS_6931	-1.0788	0.00940391	low density lipoprotein receptor adapter
FCTS_10672	-1.07829	0.00239475	Unknown
FCTS_15172	-1.07778	0.0121175	Unknown
FCTS_31062	-1.07777	0.00277912	Unknown
FCTS_17568	-1.07763	0.0184715	cytochrome p450 2j2-like
FCTS_1387	-1.07732	0.00922054	Unknown
FCTS_26274	-1.07723	0.00210672	Unknown
FCTS_9652	-1.07723	0.00889839	prophenol oxidase a1
FCTS_24859	-1.07719	0.00357069	cdc31p
FCTS_21892	-1.07715	0.0360604	Unknown
FCTS_18638	-1.07704	0.0459539	Unknown
FCTS_23515	-1.07651	0.0068451	Unknown
FCTS_9576	-1.07649	0.0188915	oxidoreductase htatip2-like
FCTS_31913	-1.07598	0.0468872	poly
FCTS_1119	-1.0754	0.0353231	Unknown
FCTS_13810	-1.07473	0.043519	na+ k+ atpase alpha subunit
FCTS_20754	-1.07461	0.0349225	Unknown
FCTS_2267	-1.07441	0.00750094	Unknown
FCTS_24090	-1.07436	0.0101422	Unknown
FCTS_8405	-1.07435	0.0231919	Unknown
FCTS_9738	-1.07433	0.00918023	inwardly rectifying k+
FCTS_1105	-1.07235	0.0263196	PREDICTED: hypothetical protein LOC100452533, partial [Pongo abelii]
FCTS_28017	-1.07222	0.0343746	Unknown
FCTS_21726	-1.07182	0.022271	Unknown
FCTS_893	-1.07173	0.0292439	peptidase d
FCTS_17203	-1.07146	0.0119555	sodium bicarbonate cotransporter
FCTS_24625	-1.07141	0.0498818	Unknown
FCTS_11378	-1.07139	0.0392994	chitinase
FCTS_3299	-1.07095	0.00675717	sodium bicarbonate cotransporter
FCTS_31516	-1.07072	0.00600251	Unknown
FCTS_8412	-1.07047	0.025015	Unknown
FCTS_2898	-1.07023	0.0350495	venom dipeptidyl peptidase 4-like
FCTS_20834	-1.06979	0.0196657	Unknown
FCTS_4730	-1.06973	0.0255516	PREDICTED: hypothetical protein LOC100573104 [Acyrthosiphon pisum]
FCTS_2849	-1.06962	0.00278411	atp-sensitive inward rectifier potassium channel 12-like
FCTS_7406	-1.06947	0.0128609	microtubule-associated protein futsch
FCTS_6945	-1.06914	0.0305077	voltage-gated ion channel
FCTS_18757	-1.06882	0.0370543	Unknown
FCTS_12234	-1.06869	0.0202634	heparan-alpha-glucosaminide n-acetyltransferase
FCTS_25549	-1.06865	0.0139713	myosin heavy chain variant b
FCTS_373	-1.06865	0.036007	Unknown
FCTS_12569	-1.06862	0.0118846	udp glucuronosyltransferase 2 polypeptide b17-like isoform 2
FCTS_21344	-1.06837	0.00383678	Unknown
FCTS_17727	-1.06815	0.0266136	glutamate-gated chloride channel subunit beta
FCTS_24649	-1.0679	0.00758434	Unknown
FCTS_25373	-1.06738	0.0266136	Unknown
FCTS_6803	-1.06668	0.0129617	Unknown
FCTS_8957	-1.06637	0.0191343	spectrin alpha
FCTS_23125	-1.06629	0.0402885	kda midgut protein
FCTS_31754	-1.06616	0.0213906	isoform m
FCTS_31974	-1.066	0.00637406	Unknown
FCTS_17786	-1.06592	0.00622428	Unknown
FCTS_665	-1.06508	0.00847953	isoform e
FCTS_10174	-1.06428	0.00657021	Unknown
FCTS_17277	-1.0641	0.0107738	supernatant protein factor
FCTS_18448	-1.06376	0.00523225	Unknown
FCTS_492	-1.06228	0.00205986	cg13759 cg13759-pa
FCTS_33696	-1.06195	0.0327354	Unknown
FCTS_32193	-1.06195	0.00294061	aminopeptidase n
FCTS_14186	-1.06172	0.0236433	Unknown
FCTS_5747	-1.06171	0.0427662	sodium-dependent nutrient amino acid transporter 1
FCTS_4720	-1.06161	0.0169011	Unknown
FCTS_32762	-1.06154	0.0155756	Unknown
FCTS_14461	-1.06093	0.00673457	ankyrin unc44
FCTS_11584	-1.06053	0.00500131	mech2 protein
FCTS_4156	-1.06044	0.0263659	glucosyl glucuronosyl transferases
FCTS_19939	-1.06038	0.00906685	Unknown
FCTS_19652	-1.06016	0.00522668	Unknown
FCTS_14686	-1.05929	0.0498262	zinc metalloproteinase nas-4
FCTS_10710	-1.05882	0.0476738	l-2-hydroxyglutarate mitochondrial isoform 2
FCTS_17999	-1.05854	0.0393523	alkaline phosphatase
FCTS_1336	-1.05832	0.0222239	poly (3-hydroxybutyrate) depolymerase
FCTS_6572	-1.05789	0.0115175	d-amino acid oxidase
FCTS_10766	-1.05716	0.00362148	Unknown
FCTS_19154	-1.05713	0.00298977	Unknown
FCTS_5300	-1.0569	0.00499676	groucho protein
FCTS_24638	-1.05682	0.0159597	Unknown
FCTS_8053	-1.05642	0.0061378	Unknown
FCTS_3953	-1.05612	0.0168729	Unknown
FCTS_16609	-1.0561	0.0430962	carboxyl choline esterase
FCTS_9407	-1.05583	0.0028935	Unknown
FCTS_18040	-1.05528	0.00610194	glycosaminoglycan xylosylkinase-like
FCTS_290	-1.05501	0.027033	macrophage-expressed gene 1 protein precursor
FCTS_20636	-1.05421	0.0107514	delta-5 fatty acid desaturase
FCTS_14096	-1.05415	0.00841312	Unknown
FCTS_16701	-1.05413	0.00652571	Unknown
FCTS_2597	-1.0534	0.0102114	Unknown
FCTS_3018	-1.05334	0.0168985	Unknown
FCTS_6719	-1.05277	0.0196005	aegerolysin domain-containing protein
FCTS_23787	-1.0526	0.0162154	carboxyl choline esterase cce016a
FCTS_23701	-1.05241	0.0188915	Unknown
FCTS_25526	-1.05235	0.0041128	Unknown
FCTS_19005	-1.0521	0.0395345	Unknown
FCTS_30896	-1.05071	0.018492	muscle-specific protein isoform b
FCTS_2391	-1.05038	0.0189217	carbonic anhydrase 1
FCTS_3842	-1.04944	0.0187345	low-density lipoprotein receptor
FCTS_6703	-1.04905	0.0341379	proclotting enzyme
FCTS_32652	-1.04905	0.00404827	Unknown
FCTS_32281	-1.04871	0.00380866	Unknown
FCTS_5649	-1.04844	0.00371853	gastric triacylglycerol lipase-like
FCTS_4001	-1.0484	0.0494026	plasma alpha-l-fucosidase
FCTS_5104	-1.04825	0.0058207	Unknown
FCTS_33259	-1.04818	0.0225928	Unknown
FCTS_23353	-1.04801	0.012055	Unknown
FCTS_2631	-1.048	0.00142018	paxillin-like isoform 2
FCTS_28804	-1.04795	0.0117512	Unknown
FCTS_28457	-1.04788	0.0468452	3-ketoacyl- mitochondrial
FCTS_13279	-1.04783	0.0157843	alpha-l-arabinofuranosidase b
FCTS_35167	-1.04766	0.0131823	Unknown
FCTS_34264	-1.04721	0.00222544	Unknown
FCTS_27099	-1.04684	0.0131027	Unknown
FCTS_10889	-1.04683	0.00994381	voltage-gated potassium channel
FCTS_34230	-1.04646	0.0129829	Unknown
FCTS_17519	-1.04558	0.00344326	Unknown
FCTS_17543	-1.04536	0.0484235	sec14-like protein 1
FCTS_19590	-1.0453	0.0282524	Unknown
FCTS_24168	-1.04524	0.00958009	Unknown
FCTS_17723	-1.04413	0.0288827	Unknown
FCTS_27025	-1.04358	0.028006	glutathione s-transferase
FCTS_19277	-1.04342	0.0293408	Unknown
FCTS_33630	-1.04325	0.0241503	Unknown
FCTS_29851	-1.04301	0.0114685	Unknown
FCTS_11651	-1.04271	0.027033	Unknown
FCTS_9123	-1.0424	0.00625209	nfx1-type zinc finger-containing protein 1-like
FCTS_4262	-1.04218	0.0198013	juvenile hormone diol kinase
FCTS_14791	-1.04201	0.0350314	Unknown
FCTS_8716	-1.04179	0.0099455	adipocyte plasma membrane-associated
FCTS_23251	-1.04156	0.0127983	5-oxoprolinase (atp-hydrolysing)
FCTS_27007	-1.0413	0.00646506	Unknown
FCTS_28104	-1.04051	0.00410842	Unknown
FCTS_6930	-1.03977	0.00720569	Unknown
FCTS_12002	-1.03946	0.0180318	epidermal growth factor receptor
FCTS_503	-1.03918	0.00292977	thiamin pyrophosphokinase 1
FCTS_6820	-1.03891	0.00548298	centromere protein v-like
FCTS_31386	-1.03829	0.00740435	24-dehydrocholesterol reductase
FCTS_27986	-1.03809	0.0133594	Unknown
FCTS_14789	-1.03803	0.00417191	Unknown
FCTS_805	-1.03612	0.0250072	carboxylesterase
FCTS_27603	-1.03605	0.00218977	Unknown
FCTS_6928	-1.03595	0.00341589	Unknown
FCTS_9813	-1.03594	0.00914239	Unknown
FCTS_5132	-1.03592	0.0324248	short-chain dehydrogenase reductase family 16c member 6-like
FCTS_5405	-1.03487	0.0193344	transmembrane protein 20
FCTS_30310	-1.03421	0.00957576	Unknown
FCTS_24091	-1.03359	0.0121751	ae007579 7 phoshohydrolase
FCTS_9221	-1.03311	0.00371482	Unknown
FCTS_9432	-1.0327	0.00348466	lim homeobox protein
FCTS_21262	-1.03215	0.00193894	Unknown
FCTS_21822	-1.03195	0.00239475	Unknown
FCTS_2753	-1.03192	0.0119026	Unknown
FCTS_21513	-1.0308	0.0242574	Unknown
FCTS_33724	-1.03064	0.0187416	Unknown
FCTS_26291	-1.03058	0.0206682	Unknown
FCTS_27239	-1.03017	0.0289647	Unknown
FCTS_13799	-1.02956	0.00732562	proline iminopeptidase
FCTS_13739	-1.02926	0.00196174	novel krab box and zinc c2h2 type domain containing protein
FCTS_34562	-1.02884	0.0234452	Unknown
FCTS_28216	-1.02863	0.00374358	Unknown
FCTS_17582	-1.02843	0.0033268	anti-dorsalizing morphogenetic protein-2
FCTS_89	-1.028	0.0210546	solute carrier family member 3
FCTS_12396	-1.02788	0.0141406	venom carboxylesterase-6-like
FCTS_3627	-1.02703	0.00402649	Unknown
FCTS_35012	-1.02669	0.00568058	Unknown
FCTS_30144	-1.02666	0.0281616	Unknown
FCTS_18185	-1.0265	0.0154415	Unknown
FCTS_35192	-1.02642	0.0353712	Unknown
FCTS_13173	-1.02634	0.0136105	Unknown
FCTS_16139	-1.0259	0.0254445	Unknown
FCTS_8814	-1.02582	0.0181568	fibroblast growth factor receptor
FCTS_10708	-1.02568	0.00727389	Unknown
FCTS_11150	-1.02556	0.0233975	Unknown
FCTS_4445	-1.02467	0.0188076	Unknown
FCTS_27586	-1.02447	0.0043566	Unknown
FCTS_17980	-1.0244	0.0298871	Unknown
FCTS_6279	-1.02435	0.00376819	tyrosine kinase
FCTS_6519	-1.02426	0.0140144	Unknown
FCTS_3286	-1.0236	0.0206586	transcriptional family protease
FCTS_17073	-1.02306	0.0421599	Unknown
FCTS_10651	-1.02304	0.0103977	epidermal retinol dehydrogenase 2-like
FCTS_14376	-1.023	0.00602137	Unknown
FCTS_27888	-1.02257	0.00543432	Unknown
FCTS_9842	-1.02204	0.00634412	diacylglycerol kinase theta
FCTS_17086	-1.02195	0.0214684	Unknown
FCTS_29210	-1.0218	0.0078346	Unknown
FCTS_29202	-1.02127	0.0225978	Unknown
FCTS_24337	-1.02096	0.00439535	Unknown
FCTS_5850	-1.02019	0.0175162	Unknown
FCTS_25962	-1.0199	0.0149533	Unknown
FCTS_27752	-1.01969	0.0180139	Unknown
FCTS_32264	-1.01887	0.00566687	Unknown
FCTS_4788	-1.01847	0.0451134	membrane protein
FCTS_29464	-1.01845	0.0205292	Unknown
FCTS_13909	-1.0182	0.00376819	Unknown
FCTS_23875	-1.01789	0.0157304	gamma-aminobutyric acid type b receptor subunit 2
FCTS_24829	-1.01758	0.0292075	hat family dimerization domain-containing protein
FCTS_17296	-1.01739	0.00769648	Unknown
FCTS_24131	-1.01733	0.01151	Unknown
FCTS_8877	-1.01729	0.0277589	Unknown
FCTS_13870	-1.01721	0.0366765	isoform c
FCTS_15537	-1.0171	0.0185245	Unknown
FCTS_33599	-1.01684	0.00737823	Unknown
FCTS_4819	-1.01547	0.00295548	conserved hypothetical protein [Culex quinquefasciatus]
FCTS_12559	-1.01501	0.0478523	Unknown
FCTS_23163	-1.01477	0.00220823	Unknown
FCTS_1084	-1.01458	0.00891727	Unknown
FCTS_174	-1.01422	0.0423853	dna repair and recombination protein
FCTS_11227	-1.01406	0.0486455	Unknown
FCTS_9134	-1.01393	0.0141473	gaba-gated chloride
FCTS_7709	-1.01335	0.00404858	Unknown
FCTS_30053	-1.01283	0.00581919	Unknown
FCTS_14829	-1.01279	0.0235388	Unknown
FCTS_7946	-1.01217	0.0249557	Unknown
FCTS_7718	-1.01149	0.0028935	ferritin subunit
FCTS_22477	-1.01124	0.00269276	Unknown
FCTS_23421	-1.01082	0.0197874	transient receptor potential channel pyrexia-like
FCTS_6745	-1.01064	0.00150391	Unknown
FCTS_12441	-1.01063	0.00588204	esterase
FCTS_30561	-1.00953	0.0143111	Unknown
FCTS_33029	-1.00927	0.0418953	Unknown
FCTS_25335	-1.00914	0.00326042	Unknown
FCTS_27652	-1.00864	0.00315102	Unknown
FCTS_29433	-1.00842	0.00452013	Unknown
FCTS_30403	-1.00795	0.00942721	Unknown
FCTS_13137	-1.00788	0.0279828	paxillin
FCTS_22216	-1.00782	0.00313859	transposase domain-containing protein
FCTS_25131	-1.00779	0.0081891	Unknown
FCTS_4500	-1.00753	0.0140247	sec14-like protein
FCTS_24191	-1.00747	0.0129149	maltase-glucoamylase (alpha-glucosidase)
FCTS_3825	-1.00696	0.00427554	pol protein
FCTS_814	-1.00669	0.00707784	Unknown
FCTS_26207	-1.00616	0.00395257	Unknown
FCTS_3912	-1.00615	0.0104497	Unknown
FCTS_2399	-1.00584	0.00529666	phosphoethanolamine n-methyltransferase 3
FCTS_1557	-1.00564	0.0061378	Unknown
FCTS_23350	-1.00562	0.0251163	lipase member
FCTS_13690	-1.00521	0.0327705	Unknown
FCTS_7321	-1.00473	0.0129889	hypothetical protein [Monosiga brevicollis MX1]
FCTS_23925	-1.00463	0.00329537	transposase domain-containing protein
FCTS_1982	-1.00407	0.02843	isocitrate dehydrogenase
FCTS_33835	-1.00396	0.0143482	Unknown
FCTS_12489	-1.0038	0.00955675	protocadherin fat 1 precursor
FCTS_21395	-1.00304	0.0019446	Unknown
FCTS_28283	-1.00279	0.0182512	Unknown
FCTS_22231	-1.00262	0.025345	rcc1 and btb domain-containing protein 1
FCTS_2734	-1.00237	0.0112239	Unknown
FCTS_6402	-1.00186	0.00131	diphosphoinositol polyphosphate phosphohydrolase 1
FCTS_24332	-1.00144	0.0395937	Unknown
FCTS_786	-1.00132	0.0176077	Unknown
FCTS_6014	-1.00109	0.0120495	Unknown
FCTS_2047	-1.00101	0.0385364	Unknown
FCTS_2317	-1.00067	0.00422506	fumarate hydratase
FCTS_4456	-1.00047	0.0328011	cytochrome family subfamily polypeptide 7
FCTS_9501	-1.00023	0.0192773	Unknown
FCTS_2041	-1.00006	0.00591523	Unknown
FCTS_29178	-0.999775	0.0111348	mkiaa0956 partial
FCTS_21605	-0.999527	0.0227125	Unknown
FCTS_20380	-0.999501	0.00729772	Unknown
FCTS_16102	-0.999414	0.0187416	Unknown
FCTS_24414	-0.999395	0.0188254	Unknown
FCTS_18164	-0.999318	0.01096	Unknown
FCTS_2284	-0.997868	0.027214	Unknown
FCTS_19029	-0.997367	0.0293692	like polyketide cyclase
FCTS_6876	-0.997314	0.0289395	alcohol dehydrogenase
FCTS_15031	-0.997015	0.0135492	gdp-fucose protein o-fucosyltransferase 2
FCTS_1619	-0.996714	0.0441999	Unknown
FCTS_25910	-0.996675	0.0262737	Unknown
FCTS_12711	-0.99648	0.0123233	Unknown
FCTS_23708	-0.996279	0.00907957	Unknown
FCTS_12345	-0.996221	0.0243674	cysteine dioxygenase
FCTS_31131	-0.996167	0.0238245	Unknown
FCTS_14873	-0.996028	0.00801063	abc transporter g family member 20
FCTS_29856	-0.995669	0.0224813	Unknown
FCTS_21845	-0.99451	0.0182593	probable cytochrome p450 305a1-like
FCTS_21230	-0.99443	0.0185379	parallel beta-helix
FCTS_33606	-0.994407	0.0142233	Unknown
FCTS_1900	-0.994257	0.00889839	prostamide prostaglandin f synthase
FCTS_28422	-0.99339	0.00378693	Unknown
FCTS_19769	-0.992379	0.0333618	chymotrypsin-like proteinase 6e precursor
FCTS_14431	-0.992379	0.012004	Unknown
FCTS_9204	-0.992334	0.0117382	Unknown
FCTS_31521	-0.992256	0.0173591	Unknown
FCTS_12357	-0.992024	0.0399093	sodium calcium exchanger 3
FCTS_29371	-0.991477	0.0325088	Unknown
FCTS_23486	-0.991199	0.00610194	Unknown
FCTS_22943	-0.991054	0.0084476	Unknown
FCTS_11175	-0.990968	0.034242	Unknown
FCTS_685	-0.990865	0.0176228	Unknown
FCTS_25783	-0.990861	0.00956105	Unknown
FCTS_13277	-0.990638	0.0103988	Unknown
FCTS_23500	-0.98968	0.00698659	cystathionine gamma-synthase
FCTS_8365	-0.989291	0.0387794	Unknown
FCTS_24903	-0.989256	0.00602137	Unknown
FCTS_21915	-0.988867	0.00366362	Unknown
FCTS_5815	-0.988702	0.0459712	Unknown
FCTS_17982	-0.988384	0.0338907	Unknown
FCTS_29193	-0.988297	0.0182254	Unknown
FCTS_367	-0.988204	0.00273572	probable dimethyladenosine transferase
FCTS_23900	-0.987973	0.0468261	zinc finger protein
FCTS_18502	-0.98797	0.0184701	Unknown
FCTS_8012	-0.987931	0.0234923	krotzkopf isoform d
FCTS_30040	-0.987361	0.0315953	Unknown
FCTS_31005	-0.98728	0.0195751	Unknown
FCTS_21070	-0.987172	0.0173591	Unknown
FCTS_33096	-0.987123	0.0220883	Unknown
FCTS_15314	-0.986445	0.0233688	Unknown
FCTS_33870	-0.986374	0.0443763	sucrase- intestinal
FCTS_8637	-0.985957	0.0464936	4-hydroxyphenylpyruvate dioxygenase
FCTS_1826	-0.985952	0.00576497	liver tocopherol-associated protein
FCTS_6717	-0.985544	0.00373664	esterase 10
FCTS_24279	-0.984991	0.00985855	Unknown
FCTS_17266	-0.98491	0.0121578	Unknown
FCTS_16750	-0.984709	0.0175945	Unknown
FCTS_20916	-0.98379	0.0190443	Unknown
FCTS_12949	-0.983443	0.00476509	oxidase peroxidase
FCTS_17351	-0.982479	0.0103157	Unknown
FCTS_18115	-0.982368	0.00763063	Unknown
FCTS_5545	-0.982214	0.010343	Unknown
FCTS_26947	-0.981963	0.00278891	Unknown
FCTS_29858	-0.981947	0.0318345	glutathione s-transferase-like
FCTS_20814	-0.981689	0.0041971	Unknown
FCTS_4848	-0.981	0.00448832	Unknown
FCTS_29645	-0.98085	0.0438276	laminin a
FCTS_9026	-0.980728	0.0187416	Unknown
FCTS_3002	-0.980525	0.00161021	Unknown
FCTS_18870	-0.980491	0.0492642	Unknown
FCTS_32024	-0.980473	0.0257589	Unknown
FCTS_26380	-0.980012	0.0133614	Unknown
FCTS_9244	-0.979919	0.00586773	collagen alpha-1
FCTS_6336	-0.979893	0.0235388	cyclopropane-fatty-acyl-phospholipid synthase
FCTS_33252	-0.979832	0.00881381	Unknown
FCTS_17235	-0.979779	0.0227125	Unknown
FCTS_32016	-0.979723	0.0192794	hemocyanin subunit 6
FCTS_28046	-0.978768	0.0161592	Unknown
FCTS_5245	-0.978002	0.0085619	protein
FCTS_8066	-0.977999	0.048717	high affinity copper uptake protein 1-like
FCTS_11300	-0.977176	0.00881381	retinal-binding protein
FCTS_184	-0.97666	0.0185292	excitatory amino acid transporter 1-like
FCTS_16547	-0.976433	0.0323032	Unknown
FCTS_13269	-0.976403	0.0417909	Unknown
FCTS_17286	-0.976333	0.0407843	Unknown
FCTS_4986	-0.975848	0.0130973	Unknown
FCTS_2850	-0.975183	0.0380245	integrin alpha-ps1
FCTS_17152	-0.974762	0.0127069	Unknown
FCTS_7294	-0.974591	0.0239405	ubiquitin-conjugating enzyme e2
FCTS_15002	-0.974451	0.0318641	Unknown
FCTS_3164	-0.97411	0.019711	atp dependent helicase
FCTS_24533	-0.973897	0.00887455	Unknown
FCTS_12521	-0.97379	0.00775547	Unknown
FCTS_29838	-0.972868	0.0482214	Unknown
FCTS_17760	-0.972824	0.00193894	Unknown
FCTS_17477	-0.972773	0.0200941	Unknown
FCTS_26679	-0.972482	0.0423661	spectrin beta
FCTS_23765	-0.972306	0.0184711	Unknown
FCTS_10309	-0.9721	0.0376031	Unknown
FCTS_18604	-0.971981	0.00996388	Unknown
FCTS_16338	-0.971794	0.00225835	Unknown
FCTS_15329	-0.971567	0.00444592	24-dehydrocholesterol reductase
FCTS_9298	-0.971441	0.00648335	non-specific lipid-transfer protein
FCTS_34493	-0.971068	0.0150384	Unknown
FCTS_23957	-0.970926	0.00548525	Unknown
FCTS_21252	-0.970534	0.0431532	regulator of nonsense
FCTS_8702	-0.970506	0.0124686	Unknown
FCTS_312	-0.970242	0.0377321	Unknown
FCTS_18930	-0.970175	0.0231649	1-phosphatidylinositol- -bisphosphate phosphodiesterase gamma-1
FCTS_21831	-0.970126	0.0162995	Unknown
FCTS_10794	-0.970027	0.00510637	Unknown
FCTS_31729	-0.969821	0.0245962	poly
FCTS_16030	-0.969415	0.0307567	serine protease
FCTS_22076	-0.968558	0.00901472	Unknown
FCTS_8727	-0.96808	0.00748308	Unknown
FCTS_11709	-0.967863	0.0350426	sodium-driven chloride bicarbonate exchanger
FCTS_5888	-0.96663	0.0475756	Unknown
FCTS_31635	-0.966485	0.0109725	Unknown
FCTS_19572	-0.966294	0.003189	Unknown
FCTS_9190	-0.965193	0.0266235	cytochrome p450
FCTS_30201	-0.964035	0.0129986	Unknown
FCTS_8724	-0.963196	0.00938245	cgmp-inhibited 3 -cyclic phosphodiesterase b
FCTS_21052	-0.963137	0.0204658	Unknown
FCTS_14490	-0.963104	0.00978296	Unknown
FCTS_6582	-0.962799	0.0392133	sodium solute
FCTS_30346	-0.962747	0.0405878	Unknown
FCTS_22894	-0.96272	0.0388551	Unknown
FCTS_26962	-0.962384	0.0108304	Unknown
FCTS_6732	-0.962284	0.00784635	Unknown
FCTS_25518	-0.961479	0.00259029	Unknown
FCTS_4092	-0.960141	0.00495386	isoform b
FCTS_18844	-0.959955	0.032871	tetratricopeptide repeat protein 38-like
FCTS_13087	-0.959355	0.0345639	Unknown
FCTS_14374	-0.959045	0.0277589	glycoprotein 3-alpha-l-fucosyltransferase a-like
FCTS_23395	-0.959026	0.00958147	xanthine dehydrogenase oxidase
FCTS_31335	-0.958935	0.00844249	Unknown
FCTS_29019	-0.958834	0.00138557	Unknown
FCTS_6861	-0.95874	0.0338388	Unknown
FCTS_9788	-0.958272	0.0166969	laminin a
FCTS_14582	-0.957959	0.00358442	Unknown
FCTS_5455	-0.957124	0.0192966	hypothetical protein EAI 02279 [Harpegnathos saltator]
FCTS_21444	-0.957057	0.0259845	Unknown
FCTS_7931	-0.957051	0.0480683	potassium channel subfamily k member 18
FCTS_9327	-0.956982	0.0190429	protein takeout-like
FCTS_8773	-0.956233	0.0218107	Unknown
FCTS_16933	-0.956065	0.0199131	pancreatic alpha-amylase-like
FCTS_11975	-0.955185	0.0314335	kinetochore protein nuf2
FCTS_25665	-0.954981	0.0285679	Unknown
FCTS_26790	-0.95465	0.00657021	uridine phosphorylase 1-like
FCTS_17177	-0.954462	0.0105748	Unknown
FCTS_27865	-0.954456	0.00587896	Unknown
FCTS_14792	-0.954261	0.0361247	Unknown
FCTS_22738	-0.954093	0.0279348	Unknown
FCTS_24945	-0.953908	0.0333397	alkaline phosphatase
FCTS_31631	-0.953325	0.0236594	Unknown
FCTS_21559	-0.952913	0.0250072	Unknown
FCTS_18273	-0.952458	0.0326707	Unknown
FCTS_12982	-0.952378	0.0116794	Unknown
FCTS_5309	-0.951942	0.0245056	Unknown
FCTS_14019	-0.951792	0.00828113	Unknown
FCTS_31610	-0.951652	0.0123606	Unknown
FCTS_33361	-0.951464	0.00838216	Unknown
FCTS_2280	-0.95125	0.0266311	Unknown
FCTS_16958	-0.951123	0.0317468	bullous pemphigoid antigen isoforms 6 9 10
FCTS_26379	-0.950825	0.0266889	Unknown
FCTS_23398	-0.950609	0.0469661	Unknown
FCTS_18619	-0.95033	0.00781591	Unknown
FCTS_10621	-0.950273	0.0366407	Unknown
FCTS_3769	-0.950231	0.0469314	lipase 1 precursor
FCTS_21691	-0.950158	0.0384186	myosin i beta
FCTS_7148	-0.949752	0.00284949	Unknown
FCTS_17464	-0.949717	0.0415211	Unknown
FCTS_9229	-0.949546	0.00561339	Unknown
FCTS_10113	-0.948963	0.0397784	Unknown
FCTS_14552	-0.948902	0.00268277	Unknown
FCTS_34253	-0.948497	0.0387908	Unknown
FCTS_26756	-0.948442	0.0432355	Unknown
FCTS_5680	-0.947248	0.00193894	polyketide synthase
FCTS_8952	-0.946964	0.00881381	selenocysteine lyase
FCTS_12929	-0.946667	0.0183977	glyoxylate reductase hydroxypyruvate reductase
FCTS_14515	-0.946654	0.00643075	Unknown
FCTS_1796	-0.946177	0.00974927	Unknown
FCTS_34213	-0.945995	0.044198	Unknown
FCTS_21529	-0.945624	0.0124516	Unknown
FCTS_1408	-0.945604	0.00418333	probable 2-oxoglutarate dehydrogenase e1 component mitochondrial
FCTS_10749	-0.945369	0.00994845	Unknown
FCTS_21599	-0.945305	0.0338146	cytochrome b5-related protein
FCTS_1911	-0.945281	0.00631256	protocadherin fat 1 precursor
FCTS_9300	-0.944604	0.0232457	Unknown
FCTS_12042	-0.94431	0.0454854	Unknown
FCTS_10291	-0.94392	0.0301639	dbh-like 1
FCTS_6405	-0.943169	0.0255108	2og-fe oxygenase
FCTS_18439	-0.942258	0.0135714	delta-5 fatty acid desaturase
FCTS_23587	-0.941818	0.028618	Unknown
FCTS_20285	-0.941674	0.00611803	gaba receptor
FCTS_5506	-0.941433	0.00599728	Unknown
FCTS_7085	-0.941172	0.0207769	alcohol dehydrogenase
FCTS_356	-0.941137	0.0290669	succinyl- synthetase small
FCTS_31430	-0.940393	0.008742	Unknown
FCTS_24990	-0.940214	0.00159522	apical endosomal glycoprotein
FCTS_4858	-0.939506	0.0295135	hypothetical protein CLOST 2077 [Clostridium sticklandii DSM 519]
FCTS_8731	-0.93909	0.0323032	malate mitochondrial-like
FCTS_12460	-0.93901	0.0371109	Unknown
FCTS_12835	-0.938752	0.00714526	dna-binding protein d-ets-4
FCTS_23893	-0.93864	0.0216856	Unknown
FCTS_14696	-0.9386	0.00595209	Unknown
FCTS_1852	-0.937634	0.0208183	Unknown
FCTS_22852	-0.937608	0.0402302	hypothetical protein DAPPUDRAFT 61311 [Daphnia pulex]
FCTS_7809	-0.93592	0.00355946	sec14-like 4 ( cerevisiae)
FCTS_31380	-0.935791	0.00973829	Unknown
FCTS_13211	-0.935255	0.0392959	Unknown
FCTS_19016	-0.934495	0.0124925	latrophilin receptor family member (lat-1)
FCTS_19135	-0.93432	0.0033268	Unknown
FCTS_16313	-0.933827	0.0292154	Unknown
FCTS_13523	-0.933603	0.0397975	isoform k
FCTS_24285	-0.933512	0.0225314	Unknown
FCTS_13714	-0.933158	0.00714526	glutamate ionotropic kainate 2
FCTS_21791	-0.932861	0.0155503	si:ch211- protein
FCTS_7637	-0.932838	0.0169933	Unknown
FCTS_15985	-0.932783	0.023932	Unknown
FCTS_15269	-0.932761	0.00474134	Unknown
FCTS_21341	-0.932512	0.00859483	myosin-viia
FCTS_23241	-0.932433	0.00741039	Unknown
FCTS_30027	-0.932127	0.0335393	Unknown
FCTS_28291	-0.931452	0.0077244	Unknown
FCTS_12203	-0.931338	0.0367851	Unknown
FCTS_10594	-0.931239	0.0278818	heat shock protein
FCTS_9295	-0.930635	0.0356297	atp-dependent dna helicase pif1- partial
FCTS_25889	-0.930538	0.00281701	Unknown
FCTS_3962	-0.930517	0.0308939	Unknown
FCTS_947	-0.930446	0.027676	sodium-dependent phosphate transporter
FCTS_19109	-0.930416	0.0046105	Unknown
FCTS_15521	-0.929898	0.00512767	innexin 2
FCTS_6753	-0.929892	0.0132484	Unknown
FCTS_30398	-0.929449	0.0418244	Unknown
FCTS_19491	-0.929071	0.0126288	Unknown
FCTS_12405	-0.928881	0.0160895	cytochrome c
FCTS_3830	-0.928815	0.00418333	isoform e
FCTS_32768	-0.928317	0.0427662	Unknown
FCTS_22333	-0.928208	0.0121281	Unknown
FCTS_19218	-0.927991	0.0156352	Unknown
FCTS_23524	-0.927982	0.0221257	Unknown
FCTS_28045	-0.927374	0.0165016	p2x purinoceptor 4
FCTS_20567	-0.926503	0.0129097	Unknown
FCTS_26065	-0.926188	0.0044997	endothelin-converting enzyme 1-like
FCTS_16340	-0.925765	0.020366	enoyl- delta isomerase mitochondrial-like
FCTS_21352	-0.925043	0.0143183	Unknown
FCTS_8567	-0.925039	0.00683179	splicing factor 4
FCTS_8271	-0.925032	0.030831	PREDICTED: baldspot-like [Saccoglossus kowalevskii]
FCTS_21273	-0.924833	0.0190778	cd36 antigen (collagen type i thrombospondin receptor) isoform cra a
FCTS_8514	-0.924749	0.0265063	Unknown
FCTS_28416	-0.924493	0.0225978	Unknown
FCTS_23899	-0.924329	0.00539449	Unknown
FCTS_33004	-0.924214	0.00401608	Unknown
FCTS_20704	-0.9239	0.0101914	Unknown
FCTS_29226	-0.923854	0.021669	Unknown
FCTS_1239	-0.923709	0.0293758	Unknown
FCTS_24640	-0.922968	0.0161592	Unknown
FCTS_21450	-0.922475	0.00273879	Unknown
FCTS_13808	-0.922381	0.042769	lipase 3
FCTS_29223	-0.921892	0.010343	Unknown
FCTS_11585	-0.921849	0.00598579	protein anon-
FCTS_9862	-0.921651	0.00581738	Unknown
FCTS_35137	-0.921045	0.00581738	Unknown
FCTS_26506	-0.920989	0.00465145	galactose-specific c-type
FCTS_6235	-0.920714	0.0218153	trunk
FCTS_33305	-0.920569	0.0371837	Unknown
FCTS_18338	-0.920304	0.00605825	tbc1 domain family member 9
FCTS_21814	-0.919989	0.00810023	Unknown
FCTS_3577	-0.919404	0.00750037	glycine n-methyltransferase
FCTS_7305	-0.919283	0.0121209	Unknown
FCTS_33681	-0.91855	0.00441634	hypothetical protein CaO19.2585 [Candida albicans SC5314]
FCTS_11471	-0.918459	0.00657021	nicotinic acetylcholine receptor subunit beta 1
FCTS_10104	-0.918172	0.0430279	squalene synthase
FCTS_19952	-0.918164	0.0336963	Unknown
FCTS_12247	-0.917801	0.0154818	isochorismatase hydrolase
FCTS_241	-0.91749	0.0105967	long-chain fatty acid transport protein 4-like
FCTS_2736	-0.91724	0.0118548	Unknown
FCTS_8469	-0.917152	0.0253415	abc subfamily abch
FCTS_8109	-0.917134	0.0462537	Unknown
FCTS_19595	-0.916809	0.00705934	Unknown
FCTS_12136	-0.916516	0.00235509	Unknown
FCTS_29412	-0.916364	0.0067088	Unknown
FCTS_15014	-0.916236	0.013132	Unknown
FCTS_8236	-0.915457	0.0150847	sec14-like protein 2
FCTS_28353	-0.915448	0.00493096	Unknown
FCTS_8617	-0.915326	0.0123604	maguk p55 subfamily member 6-like
FCTS_27461	-0.915003	0.00848456	Unknown
FCTS_6153	-0.914933	0.00324106	laminin alpha- 2 chain
FCTS_26743	-0.914632	0.037099	udp-n-acetylglucosamine:a- -d-mannoside beta- -n-acetylglucosaminyltransferase iv-like protein
FCTS_12763	-0.914597	0.0175303	nuclear receptor
FCTS_13802	-0.914326	0.00536108	nucleoside transporter
FCTS_33815	-0.913984	0.0226999	Unknown
FCTS_28103	-0.913956	0.0498334	Unknown
FCTS_1317	-0.912573	0.0113734	neurochondrin homolog
FCTS_22906	-0.912517	0.00380262	set and mynd domain-containing
FCTS_25352	-0.912424	0.0174117	Unknown
FCTS_14909	-0.912362	0.0172124	Unknown
FCTS_11060	-0.911689	0.0128318	diacylglycerol o-acyltransferase
FCTS_17461	-0.911683	0.0457817	solute carrier family 22 member 20
FCTS_24134	-0.91128	0.0229315	Unknown
FCTS_25377	-0.910764	0.00987629	Unknown
FCTS_18959	-0.910762	0.0129149	myosin heavy muscle
FCTS_31711	-0.910293	0.017151	Unknown
FCTS_12493	-0.909962	0.0111491	Unknown
FCTS_30819	-0.909904	0.0262095	aldehyde dehydrogenase family 3 member b1-like isoform 1
FCTS_4670	-0.90968	0.0169897	double stranded rna-dependent protein kinase
FCTS_33136	-0.909463	0.00465957	Unknown
FCTS_4880	-0.909235	0.0086732	long-chain-fatty-acid-- ligase 3-like
FCTS_30787	-0.908778	0.0440112	Unknown
FCTS_6293	-0.908704	0.00209679	Unknown
FCTS_14074	-0.907902	0.0159361	Unknown
FCTS_21271	-0.907874	0.00360426	Unknown
FCTS_7713	-0.907851	0.0432832	cytochrome p450 307a1
FCTS_2931	-0.907336	0.010258	glutamate ionotropic kainate 2
FCTS_5547	-0.907198	0.00948238	Unknown
FCTS_25771	-0.907108	0.0221981	Unknown
FCTS_11539	-0.907098	0.0348807	unknown [Zea mays]
FCTS_2581	-0.906985	0.0107709	dihydropyrimidine dehydrogenase
FCTS_5516	-0.906425	0.0449325	protein
FCTS_30096	-0.906125	0.00482511	Unknown
FCTS_31171	-0.906108	0.0488844	Unknown
[truncated: 1,632 more rows]
