# Supplementary material for: The ecotoxicogenomic assessment of soil toxicity associated with the production chain of 2,5-furandicarboxylic acid (FDCA), a candidate bio-based green chemical building block
Source: Royal Society of Chemistry journal article supplement (doi:10.1039/c6gc00430j), 2016-01-01
Supplement: c6gc00430j3.xlsx [file c6gc00430j3.xlsx]

## Sheet: TableS2
Ecotoxicogenomic assessment of 2, 5-furandicarboxylic acid (FDCA), a candidate bio-based green chemical building block, in soil ecosystem
Guangquan Chen,Nico M. van Straalen and Dick Roelofs
Table S2: Significant GO terms found in Folsomia candida for EC50 HMF soil treatment compared to control after Gene Ontology Enrichment Analysis.
significantly up- and down-regulated genes were subjected to GO enrichment analysis separately. List of the total number of genes present in this GO
term, the number of genes found for this GO term in the significant gene list and p value calculated by the weighted Fisher’s Exact Test.
This file contains:
Table S2_1 : Significantly affected GO terms of the up-regulated gene group by exposure of Folsomia candida to EC50 of HMF
Table S2_2: Significantly affected GO terms of the down-regulated gene group by exposure of Folsomia candida to EC50 of HMF
GO term		Name of the gene Ontology terms derived from Blast2GO
Description (Biological Process)		Biological process description derived from Blast2GO
Annotated		The total number of genes present in this GO term
Significant		The number of genes found for this GO term in the significant gene list
p vaule		The p value calculated by the weighted Fisher’s Exact Test

## Sheet: Table S2_1
Table S2_1 : Significantly affected GO terms of the up-regulated gene group by exposure of Folsomia candida to EC50 of HMF
GO term	Description (Biological Process)	Annotated	Significant	p value
GO:0006351	transcription, DNA-templated	738	218	5.4e-25
GO:0051253	negative regulation of RNA metabolic process	201	68	1.9e-11
GO:0044260	cellular macromolecule metabolic process	2927	686	1.2e-10
GO:0090304	nucleic acid metabolic process	1499	420	2.2e-09
GO:0010467	gene expression	1421	376	1.1e-08
GO:0015031	protein transport	343	83	7e-06
GO:0006448	regulation of translational elongation	28	14	7.1e-06
GO:1903047	mitotic cell cycle process	247	64	1.9e-05
GO:0007049	cell cycle	579	142	7.1e-05
GO:0006974	cellular response to DNA damage stimulus	270	67	0.00013
GO:0006505	GPI anchor metabolic process	17	9	0.00019
GO:0043966	histone H3 acetylation	15	8	0.00041
GO:0051568	histone H3-K4 methylation	15	8	0.00041
GO:0006511	ubiquitin-dependent protein catabolic process	169	41	0.00041
GO:0022008	neurogenesis	635	120	0.00053
GO:0007349	cellularization	36	13	0.00085
GO:0032508	DNA duplex unwinding	20	9	0.00087
GO:0008285	negative regulation of cell proliferation	80	24	0.00089
GO:0044843	cell cycle G1/S phase transition	46	14	0.00093
GO:0009069	serine family amino acid metabolic process	274	58	0.00151
GO:0048149	behavioral response to ethanol	11	6	0.00197
GO:0051177	meiotic sister chromatid cohesion	3	3	0.00285
GO:0016570	histone modification	167	52	0.00344
GO:0051101	regulation of DNA binding	24	9	0.00398
GO:0006913	nucleocytoplasmic transport	118	31	0.00421
GO:0051301	cell division	312	70	0.00543
GO:0007480	imaginal disc-derived leg morphogenesis	21	8	0.00587
GO:0006184	GTP catabolic process	214	44	0.00599
GO:0016568	chromatin modification	219	66	0.00635
GO:0016183	synaptic vesicle coating	10	5	0.00773
GO:0043982	histone H4-K8 acetylation	10	5	0.00773
GO:0008347	glial cell migration	18	7	0.00867
GO:0046331	lateral inhibition	66	17	0.00912
GO:0032259	methylation	112	33	0.00949
GO:0016310	phosphorylation	770	138	0.0098
GO:0000084	mitotic S phase	32	10	0.01061
GO:0051298	centrosome duplication	21	8	0.01205
GO:0016567	protein ubiquitination	184	41	0.01226
GO:0090100	positive regulation of transmembrane receptor protein	15	6	0.01284
GO:0010212	response to ionizing radiation	24	8	0.01436
GO:0042254	ribosome biogenesis	111	27	0.01503
GO:0006334	nucleosome assembly	29	9	0.01577
GO:0019991	septate junction assembly	29	9	0.01577
GO:0007596	blood coagulation	68	17	0.01727
GO:0000724	double-strand break repair via homologous recombination	8	4	0.01755
GO:0001701	in utero embryonic development	62	17	0.01796
GO:0002067	glandular epithelial cell differentiation	8	4	0.02009
GO:0019322	pentose biosynthetic process	2	2	0.02012
GO:0019348	dolichol metabolic process	2	2	0.02012
GO:0021631	optic nerve morphogenesis	2	2	0.02012
GO:0032958	inositol phosphate biosynthetic process	2	2	0.02012
GO:0042481	regulation of odontogenesis	2	2	0.02012
GO:0045616	regulation of keratinocyte differentiation	2	2	0.02012
GO:0048536	spleen development	2	2	0.02012
GO:0060343	trabecula formation	2	2	0.02012
GO:0061312	BMP signaling pathway involved in heart development	2	2	0.02012
GO:0006904	vesicle docking involved in exocytosis	21	7	0.0216
GO:0007095	mitotic G2 DNA damage checkpoint	21	7	0.0216
GO:0007264	small monomeric GTPase relays one or more of the signals	212	42	0.02184
GO:0000915	actomyosin contractile ring assembly	5	3	0.0228
GO:0008348	negative regulation of antimicrobial humoral response	5	3	0.0228
GO:0003333	amino acid transmembrane transport	26	8	0.02355
GO:0043065	positive regulation of apoptotic process	41	11	0.02436
GO:0016055	Wnt signaling pathway	109	25	0.02497
GO:0010608	posttranscriptional regulation of gene expression	178	45	0.02677
GO:0045879	negative regulation of smoothened signaling pathway	13	5	0.02737
GO:0048190	wing disc dorsal/ventral pattern formation namespace	13	5	0.02737
GO:0007254	JNK cascade	51	13	0.02786
GO:0030308	negative regulation of cell growth	22	7	0.0279
GO:0009452	7-methylguanosine RNA capping	9	4	0.02809
GO:0010388	cullin deneddylation	9	4	0.02809
GO:0043984	histone H4-K16 acetylation	9	4	0.02809
GO:0010498	proteasomal protein catabolic process	77	17	0.02969
GO:0035162	embryonic hemopoiesis	32	9	0.02987
GO:0042967	acyl-carrier-protein biosynthetic process	86	19	0.03048
GO:0016358	dendrite development	81	18	0.03131
GO:0006888	ER to Golgi vesicle-mediated transport	23	7	0.03534
GO:0019497	hexachlorocyclohexane metabolic process	14	5	0.03772
GO:0045475	locomotor rhythm	14	5	0.03772
GO:0006488	dolichyl diphosphate biosynthetic process	6	3	0.04083
GO:0006607	NLS-bearing protein import into nucleus	6	3	0.04083
GO:0048148	behavioral response to cocaine	6	3	0.04083
GO:0060395	SMAD protein signal transduction	6	3	0.04083
GO:0001522	pseudouridine synthesis	10	4	0.04167
GO:0006614	SRP-dependent cotranslational protein targeting to membrane	10	4	0.04167
GO:0007474	imaginal disc-derived wing vein specification	19	6	0.04229
GO:0008049	male courtship behavior	19	6	0.04229
GO:0043066	negative regulation of apoptotic process	86	19	0.04511

## Sheet: Table S2_2
Table S2_2: Significantly affected GO terms of the down-regulated gene group by exposure of Folsomia candida to EC50 of HMF
GO term	Description (Biological Process)	Annotated	Significant	p value
GO:0055114	oxidation-reduction process	831	154	4.2e-21
GO:0045214	sarcomere organization	42	19	1.9e-10
GO:0006695	cholesterol biosynthetic process	23	8	0.00036
GO:0070588	calcium ion transmembrane transport	24	8	0.0005
GO:0043154	negative regulation of cysteine-type endopeptidase activity	14	6	0.00056
GO:0060538	skeletal muscle organ development	67	15	0.00065
GO:0008586	imaginal disc-derived wing vein morphogenesis	31	9	0.00071
GO:0007498	mesoderm development	80	16	0.0008
GO:0015672	monovalent inorganic cation transport	179	28	0.00091
GO:0007300	ovarian nurse cell to oocyte transport	37	10	0.00198
GO:0005975	carbohydrate metabolic process	472	57	0.00209
GO:0003012	muscle system process	67	13	0.00273
GO:0035159	regulation of tube size, open tracheal system is-a regulation of tube length	31	8	0.00317
GO:0030241	skeletal muscle myosin thick filament assembly	14	5	0.00423
GO:0035072	ecdysone-mediated induction of salivary gland cell autophagic cell death	14	5	0.00423
GO:0035235	ionotropic glutamate receptor signaling pathway	9	4	0.00432
GO:0042987	amyloid precursor protein catabolic process	5	3	0.0051
GO:0060061	Spemann organizer formation	2	2	0.00696
GO:0060206	estrous cycle phase	2	2	0.00696
GO:0051289	protein homotetramerization	22	6	0.00774
GO:0031639	plasminogen activation	6	3	0.00956
GO:0055085	transmembrane transport	485	61	0.00998
GO:0046664	dorsal closure, amnioserosa morphology change	17	5	0.0106
GO:0006099	tricarboxylic acid cycle	38	8	0.0117
GO:0045200	establishment of neuroblast polarity	12	4	0.01385
GO:0006629	lipid metabolic process	688	85	0.01554
GO:0006979	response to oxidative stress	101	16	0.01587
GO:0006566	threonine metabolic process	40	8	0.01588
GO:0007443	Malpighian tubule morphogenesis	33	7	0.01722
GO:0007427	epithelial cell migration, open tracheal system	19	5	0.01733
GO:0007076	mitotic chromosome condensation	13	4	0.0187
GO:0007395	dorsal closure, spreading of leading edge cells	13	4	0.0187
GO:0046663	dorsal closure, leading edge cell differentiation	13	4	0.0187
GO:0005985	sucrose metabolic process	34	7	0.02017
GO:0043627	response to estrogen	27	6	0.0215
GO:0018874	benzoate metabolic process	14	4	0.02449
GO:0035017	cuticle pattern formation	21	5	0.02641
GO:0006821	chloride transport	52	9	0.02669
GO:0006563	L-serine metabolic process	44	8	0.0273
GO:0006030	chitin metabolic process	88	13	0.03013
GO:0006544	glycine metabolic process	45	8	0.03086
GO:0007613	memory	37	7	0.03109
GO:0007015	actin filament organization	106	14	0.03234
GO:0010884	positive regulation of lipid storage	9	3	0.03322
GO:0042178	xenobiotic catabolic process	9	3	0.03322
GO:0003281	ventricular septum development	6	3	0.03719
GO:0044341	sodium-dependent phosphate transport	4	2	0.03726
GO:0006631	fatty acid metabolic process	156	24	0.0376
GO:0009072	aromatic amino acid family metabolic process	114	16	0.04017
GO:0007016	A cytoskeleton organization process that directly or indirectly links cytoskeletal filaments to the plasma membrane	10	3	0.04458
GO:0007608	sensory perception of smell	10	3	0.04458
GO:0016081	synaptic vesicle docking involved in exocytosis	10	3	0.04458
GO:0042572	retinol metabolic process	10	3	0.04458
GO:0000022	mitotic spindle elongation	24	5	0.04488
GO:0009612	response to mechanical stimulus	32	6	0.04625
