# Supplementary material for: The ecotoxicogenomic assessment of soil toxicity associated with the production chain of 2,5-furandicarboxylic acid (FDCA), a candidate bio-based green chemical building block
Source: Royal Society of Chemistry journal article supplement (doi:10.1039/c6gc00430j), 2016-01-01
Supplement: c6gc00430j4.xlsx [file c6gc00430j4.xlsx]

## Sheet: Table S3
Ecotoxicogenomic assessment of 2, 5-furandicarboxylic acid (FDCA), a candidate bio-based green chemical building block, in soil ecosystem
Guangquan Chen,Nico M. van Straalen and Dick Roelofs
Table S3: Representative GO terms found in Folsomia candida for EC50 HMF soil treatment compared to control after summarizing by REVIGO Analysis.
significantly up- and down-regulated genes were subjected to REVIGO analysis separately.
This file contains:
Table S3_1 : Representative GO terms of the up-regulated gene group by exposure of Folsomia candida to EC50 of HMF
Table S3_2: Representative GO terms of the down-regulated gene group by exposure of Folsomia candida to EC50 of HMF
GO term		Name of the gene Ontology terms derived from Blast2GO
Description (Biological Process)		Biological process description derived from Blast2GO
Log10 p value		The log10 of the p value calculated by the weighted Fisher’s Exact Test
Dispensability		Semantic similarity
Representative GO term		The most representative GO term for the subset

## Sheet: Table S3_1
Table S3_1: Representative GO terms of the up-regulated gene group by exposure of Folsomia candida to EC50 of HMF
GO term	Description (Biological Process)	Log10pvalue	Dispensability	Representative GO term
GO:0000084	mitotic S phase	-1.9743	0	mitotic S phase
GO:0015031	protein transport	-5.1549	0	protein transport
GO:0016183	synaptic vesicle coating	-2.1118	0.397	protein transport
GO:0006913	nucleocytoplasmic transport	-2.3757	0.277	protein transport
GO:0051253	negative regulation of RNA metabolic process	-10.7212	0	negative regulation of RNA metabolism
GO:0010608	posttranscriptional regulation of gene expression	-1.5724	0.399	negative regulation of RNA metabolism
GO:0032508	DNA duplex unwinding	-3.0605	0.237	negative regulation of RNA metabolism
GO:0006184	GTP catabolic process	-2.2226	0.41	negative regulation of RNA metabolism
GO:0001522	pseudouridine synthesis	-1.3802	0.451	negative regulation of RNA metabolism
GO:0010467	gene expression	-7.9586	0.493	negative regulation of RNA metabolism
GO:0006448	regulation of translational elongation	-5.1487	0.377	negative regulation of RNA metabolism
GO:0042967	acyl-carrier-protein biosynthetic process	-1.516	0.332	negative regulation of RNA metabolism
GO:0042254	ribosome biogenesis	-1.823	0.371	negative regulation of RNA metabolism
GO:0051101	regulation of DNA binding	-2.4001	0.212	negative regulation of RNA metabolism
GO:0051568	histone H3-K4 methylation	-3.3872	0.114	negative regulation of RNA metabolism
GO:0019991	septate junction assembly	-1.8022	0.25	negative regulation of RNA metabolism
GO:0016567	protein ubiquitination	-1.9115	0.402	negative regulation of RNA metabolism
GO:0044260	cellular macromolecule metabolic process	-9.9208	0.228	negative regulation of RNA metabolism
GO:0009452	7-methylguanosine RNA capping	-1.5514	0.293	negative regulation of RNA metabolism
GO:0006511	ubiquitin-dependent protein catabolic process	-3.3872	0.26	negative regulation of RNA metabolism
GO:0006351	transcription, DNA-templated	-24.2676	0.443	negative regulation of RNA metabolism
GO:0009069	serine family amino acid metabolic process	-2.821	0.112	negative regulation of RNA metabolism
GO:0008348	negative regulation of antimicrobial humoral response	-1.6421	0.4	negative regulation of RNA metabolism
GO:0032259	methylation	-2.0227	0.008	methylation
GO:1903047	mitotic cell cycle process	-4.7212	0.023	mitotic cell cycle process
GO:0006974	cellular response to DNA damage stimulus	-3.8861	0.031	cellular response to DNA damage stimulus
GO:0090100	positive regulation of transmembrane receptor protein serine/threonine kinase signaling pathway	-1.8914	0.376	cellular response to DNA damage stimulus
GO:0010212	response to ionizing radiation	-1.8428	0.338	cellular response to DNA damage stimulus
GO:0019497	hexachlorocyclohexane metabolic process	-1.4234	0.253	cellular response to DNA damage stimulus
GO:0019322	pentose biosynthetic process	-1.6964	0.034	pentose biosynthesis
GO:0006505	GPI anchor metabolic process	-3.7212	0.066	GPI anchor metabolism
GO:0016310	phosphorylation	-2.0088	0.275	GPI anchor metabolism
GO:0019348	dolichol metabolic process	-1.6964	0.356	GPI anchor metabolism
GO:0032958	inositol phosphate biosynthetic process	-1.6964	0.458	GPI anchor metabolism
GO:0006488	dolichol-linked oligosaccharide biosynthetic process	-1.389	0.188	GPI anchor metabolism
GO:0007049	cell cycle	-4.1487	0.088	cell cycle
GO:0051301	cell division	-2.2652	0.118	cell cycle
GO:0022008	neurogenesis	-3.2757	0.089	neurogenesis

## Sheet: Table S3_2
Table S3_2: Representative GO terms of the down-regulated gene group by exposure of Folsomia candida to EC50 of HMF
GO term	Description (Biological Process)	Log10pvalue	Dispensability	Representative GO term
GO:0045214	sarcomere organization	-9.7212	0	sarcomere organization
GO:0007498	mesoderm development	-3.0969	0.436	sarcomere organization
GO:0003012	muscle system process	-2.5638	0.451	sarcomere organization
GO:0035017	cuticle pattern formation	-1.5782	0.401	sarcomere organization
GO:0035159	regulation of tube length, open tracheal system	-2.4989	0.42	sarcomere organization
GO:0051289	protein homotetramerization	-2.1113	0.401	sarcomere organization
GO:0008586	imaginal disc-derived wing vein morphogenesis	-3.1487	0.388	sarcomere organization
GO:0060206	estrous cycle phase	-2.1574	0	estrous cycle phase
GO:0006695	cholesterol biosynthetic process	-3.4437	0.027	cholesterol biosynthesis
GO:0006030	chitin metabolic process	-1.521	0.189	cholesterol biosynthesis
GO:0006566	threonine metabolic process	-1.7991	0.143	cholesterol biosynthesis
GO:0006563	L-serine metabolic process	-1.5638	0.496	cholesterol biosynthesis
GO:0042572	retinol metabolic process	-1.3509	0.457	cholesterol biosynthesis
GO:0006631	fatty acid metabolic process	-1.4248	0.498	cholesterol biosynthesis
GO:0009072	aromatic amino acid family metabolic process	-1.3961	0.457	cholesterol biosynthesis
GO:0018874	benzoate metabolic process	-1.611	0.269	cholesterol biosynthesis
GO:0070588	calcium ion transmembrane transport	-3.301	0.055	calcium ion transmembrane transport
GO:0006821	chloride transport	-1.5737	0.347	calcium ion transmembrane transport
GO:0043154	negative regulation of cysteine-type endopeptidase activity involved in apoptotic process	-3.2518	0.056	negative regulation of cysteine-type endopeptidase activity involved in apoptotic process
GO:0031639	plasminogen activation	-2.0195	0.19	negative regulation of cysteine-type endopeptidase activity involved in apoptotic process
GO:0035235	ionotropic glutamate receptor signaling pathway	-2.3645	0.18	negative regulation of cysteine-type endopeptidase activity involved in apoptotic process
GO:0043627	response to estrogen	-1.6676	0.235	negative regulation of cysteine-type endopeptidase activity involved in apoptotic process
GO:0042987	amyloid precursor protein catabolic process	-2.2924	0.17	negative regulation of cysteine-type endopeptidase activity involved in apoptotic process
GO:0009612	response to mechanical stimulus	-1.3349	0.24	negative regulation of cysteine-type endopeptidase activity involved in apoptotic process
GO:0006979	response to oxidative stress	-1.7994	0.309	negative regulation of cysteine-type endopeptidase activity involved in apoptotic process
GO:0042178	xenobiotic catabolic process	-1.4786	0.476	negative regulation of cysteine-type endopeptidase activity involved in apoptotic process
GO:0010884	positive regulation of lipid storage	-1.4786	0.154	negative regulation of cysteine-type endopeptidase activity involved in apoptotic process
GO:0006099	tricarboxylic acid cycle	-1.9318	0.076	tricarboxylic acid cycle
GO:0006629	lipid metabolic process	-1.8085	0.128	tricarboxylic acid cycle
GO:0055114	oxidation-reduction process	-20.3768	0.21	tricarboxylic acid cycle
GO:0005975	carbohydrate metabolic process	-2.6799	0.077	carbohydrate metabolism
GO:0005985	sucrose metabolic process	-1.6953	0.077	sucrose metabolism
